# Supplementary material for: Correcting the impact of the isotope composition on the mixing ratio dependency of water vapour isotope measurements with cavity ring-down spectrometers
Source: Copernicus journal article supplement (doi:10.5194/amt-13-3167-2020), 2020-06-16
Supplement: Supplementary file 1 [file mixing_ratio_dependency_Weng_et_al_data.xlsx]

## Sheet: exp1_GSM1_raw
Line	Time Code	d(18_16)Mean	d(D_H)Mean	H2O_Mean	d(18_16)_SD	d(D_H)_SD	H2O_SD	Method	d(18_16)_avg	d(D_H)_avg	H2O_avg	d(18_16)_SDM	d(D_H)_SDM	H2O_SDM	d(18_16)_SD_rms	d(D_H)_SD_rms	H2O_SD_rms
13	2017/02/22 21:40:06	-30.847	-278.38	18590	0.074	0.407	49.561	vol2.00
14	2017/02/22 21:49:15	-30.84	-278.353	18214	0.075	0.453	43.587	vol2.00
15	2017/02/22 21:58:24	-30.847	-278.4	18678	0.067	0.424	45.748	vol2.00
16	2017/02/22 22:07:33	-30.849	-278.428	18329	0.076	0.453	47.847	vol2.00	-30.8453	-278.394	18407	0.00472582	0.037899	241.634	0.0727782	0.443544	45.7604	0.0892571	0.360856	-0.3532	0.0535319
21	2017/02/22 22:54:58	-30.728	-258.543	803	0.342	2.696	12.438	vol0.10
22	2017/02/22 23:04:02	-30.806	-263.001	675	0.445	2.92	11.295	vol0.10
23	2017/02/22 23:13:05	-30.771	-264.382	632	0.384	3.582	10.87	vol0.10
24	2017/02/22 23:22:09	-30.78	-266.366	738	0.355	2.655	10.962	vol0.10	-30.7857	-264.583	681.667	0.0181751	1.69148	53.3135	0.396445	3.07713	11.0438	0.148924	14.1715	12.9801	1.69772
25	2017/02/22 23:31:13	-30.598	-269.704	1296	0.249	1.464	12.58	vol0.15
26	2017/02/22 23:40:16	-30.652	-271.06	1344	0.216	1.419	12.287	vol0.15
27	2017/02/22 23:49:20	-30.674	-271.729	1327	0.236	1.591	11.925	vol0.15
28	2017/02/22 23:58:24	-30.686	-271.971	1260	0.264	1.5	11.78	vol0.15	-30.6707	-271.587	1310.33	0.0172434	0.471884	44.411	0.239477	1.50497	11.9992	0.263924	7.16786	5.05647	0.491634
29	2017/02/23 00:07:28	-30.621	-272.925	1674	0.194	1.472	12.838	vol0.20
30	2017/02/23 00:16:32	-30.616	-273.263	1778	0.182	1.215	12.688	vol0.20
31	2017/02/23 00:25:36	-30.591	-273.525	1746	0.187	1.327	12.407	vol0.20
32	2017/02/23 00:34:40	-30.626	-273.731	1807	0.177	1.225	12.569	vol0.20	-30.611	-273.506	1777	0.0180278	0.234558	30.5123	0.182046	1.25669	12.5552	0.32359	5.24819	2.65947	0.275349
33	2017/02/23 00:43:45	-30.584	-274.115	2183	0.167	1.013	13.635	vol0.25
34	2017/02/23 00:52:49	-30.565	-274.657	2242	0.14	0.891	13.713	vol0.25
35	2017/02/23 01:01:52	-30.596	-274.75	2237	0.163	1.011	13.505	vol0.25
36	2017/02/23 01:10:56	-30.596	-274.754	2226	0.14	0.95	13.824	vol0.25	-30.5857	-274.72	2235	0.0178979	0.0548847	8.18535	0.148064	0.951928	13.6813	0.348924	4.03419	1.2428	0.153342
37	2017/02/23 01:20:00	-30.565	-275.275	2668	0.137	0.699	14.499	vol0.30
38	2017/02/23 01:29:04	-30.558	-275.394	2736	0.139	0.828	14.805	vol0.30
39	2017/02/23 01:38:09	-30.571	-275.468	2627	0.135	0.911	14.118	vol0.30
40	2017/02/23 01:47:13	-30.587	-275.564	2711	0.134	0.807	14.457	vol0.30	-30.572	-275.475	2691.33	0.0145258	0.0852369	57.0993	0.136017	0.849854	14.4627	0.36259	3.27919	0.378466	0.144116
41	2017/02/23 01:56:17	-30.551	-275.912	3075	0.104	0.658	14.579	vol0.35
42	2017/02/23 02:05:21	-30.59	-275.997	3221	0.134	0.719	15.033	vol0.35
43	2017/02/23 02:14:25	-30.523	-275.666	3196	0.102	0.828	14.989	vol0.35
44	2017/02/23 02:23:30	-30.594	-276.191	3224	0.13	0.718	15.409	vol0.35	-30.569	-275.951	3213.67	0.0398873	0.265462	15.3731	0.122828	0.756763	15.1448	0.36559	2.80319	-0.121534	0.415084
45	2017/02/23 02:32:34	-30.578	-276.345	3487	0.112	0.712	15.786	vol0.40
46	2017/02/23 02:41:38	-30.544	-276.445	3806	0.111	0.596	16.816	vol0.40
47	2017/02/23 02:50:43	-30.567	-276.433	3817	0.109	0.642	16.364	vol0.40
48	2017/02/23 02:59:48	-30.56	-276.477	3851	0.115	0.633	16.142	vol0.40	-30.557	-276.452	3824.67	0.0117898	0.022745	23.4592	0.111695	0.623984	16.4431	0.37759	2.30286	-0.717867	0.0970223
49	2017/02/23 03:08:52	-30.566	-276.665	4068	0.107	0.605	17.481	vol0.45
50	2017/02/23 03:17:58	-30.579	-276.7	4088	0.104	0.599	17.335	vol0.45
51	2017/02/23 03:27:02	-30.576	-276.732	4055	0.105	0.641	16.981	vol0.45
52	2017/02/23 03:36:07	-30.57	-276.756	4224	0.099	0.569	17.002	vol0.45	-30.575	-276.729	4122.33	0.00458258	0.0280951	89.5786	0.1027	0.603723	17.1068	0.35959	2.02519	-0.851534	0.046188
1	2017/02/23 09:53:17	-30.446	-272.01	4755	0.098	0.554	16.263	vol0.50
2	2017/02/23 10:02:22	-30.55	-275.32	4989	0.09	0.573	15.632	vol0.50
3	2017/02/23 10:11:27	-30.573	-276.139	4966	0.094	0.595	17.43	vol0.50
4	2017/02/23 10:20:31	-30.546	-276.329	4890	0.111	0.515	17.204	vol0.50	-30.5563	-275.929	4948.33	0.0145717	0.536181	51.8106	0.0987539	0.562014	16.7744	0.378257	2.82519	-0.200867	0.548707
5	2017/02/23 10:29:37	-30.535	-276.66	5290	0.089	0.533	17.098	vol0.55
6	2017/02/23 10:38:41	-30.555	-276.863	5248	0.095	0.517	17.376	vol0.55
7	2017/02/23 10:47:46	-30.56	-277.036	5498	0.086	0.53	18.854	vol0.55
8	2017/02/23 10:56:51	-30.573	-277.058	5310	0.094	0.497	18.644	vol0.55	-30.5627	-276.986	5352	0.00929157	0.1068	130.184	0.0917551	0.514846	18.303	0.371924	1.76886	-1.20653	0.130122
9	2017/02/23 11:05:56	-30.577	-277.28	5751	0.093	0.463	18.82	vol0.60
10	2017/02/23 11:15:01	-30.603	-277.389	5841	0.086	0.475	19.709	vol0.60
11	2017/02/23 11:24:06	-30.567	-277.365	5694	0.092	0.461	18.449	vol0.60
12	2017/02/23 11:33:11	-30.549	-277.192	5657	0.084	0.485	19.725	vol0.60	-30.573	-277.315	5730.67	0.0274955	0.107482	97.3259	0.0873995	0.473769	19.3036	0.36159	1.43919	-1.45353	0.244819
13	2017/02/23 11:42:16	-30.589	-277.543	6333	0.083	0.453	20.939	vol0.65
14	2017/02/23 11:51:21	-30.607	-277.583	6146	0.086	0.471	21.496	vol0.65
15	2017/02/23 12:00:26	-30.573	-277.462	6207	0.092	0.442	20.752	vol0.65
16	2017/02/23 12:09:31	-30.572	-277.593	6382	0.091	0.453	20.017	vol0.65	-30.584	-277.546	6245	0.0199249	0.0729178	122.503	0.0897051	0.45549	20.7638	0.35059	1.20852	-1.5962	0.175285
17	2017/02/23 12:18:36	-30.561	-277.484	6456	0.083	0.408	20.677	vol0.70
18	2017/02/23 12:27:41	-30.608	-277.715	6520	0.093	0.464	21.151	vol0.70
19	2017/02/23 12:36:46	-30.585	-277.568	6567	0.09	0.422	20.95	vol0.70
20	2017/02/23 12:45:52	-30.619	-277.784	6792	0.086	0.437	21.946	vol0.70	-30.604	-277.689	6626.33	0.0173494	0.110322	145.383	0.0897125	0.441342	21.3533	0.33059	1.06552	-1.5792	0.177299
21	2017/02/23 12:54:57	-30.615	-277.832	7272	0.079	0.462	23.596	vol0.75
22	2017/02/23 13:04:02	-30.622	-277.656	6893	0.075	0.383	21.865	vol0.75
23	2017/02/23 13:13:07	-30.623	-277.871	6795	0.087	0.464	22.066	vol0.75
24	2017/02/23 13:22:12	-30.645	-277.927	6888	0.084	0.436	21.268	vol0.75	-30.63	-277.818	6858.67	0.013	0.143063	55.1936	0.0821584	0.428984	21.7356	0.30459	0.936523	-1.5002	0.17687
25	2017/02/23 13:31:18	-30.644	-277.97	7497	0.072	0.442	21.669	vol0.80
26	2017/02/23 13:40:23	-30.611	-277.848	7408	0.082	0.402	23.619	vol0.80
27	2017/02/23 13:49:29	-30.653	-278.122	7780	0.083	0.447	24.245	vol0.80
28	2017/02/23 13:58:35	-30.613	-277.843	7312	0.072	0.454	22.205	vol0.80	-30.6257	-277.938	7500	0.0236925	0.159657	247.192	0.079156	0.434944	23.3719	0.308924	0.816856	-1.65453	0.247822
29	2017/02/23 14:07:41	-30.63	-278.053	8019	0.075	0.395	23.63	vol0.85
30	2017/02/23 14:16:46	-30.627	-277.912	7944	0.076	0.439	24.36	vol0.85
31	2017/02/23 14:25:52	-30.662	-278.179	8134	0.081	0.41	24.12	vol0.85
32	2017/02/23 14:34:57	-30.626	-277.997	7919	0.08	0.369	23.609	vol0.85	-30.6383	-278.029	7999	0.020502	0.136405	117.58	0.0790295	0.407014	24.0317	0.296257	0.725189	-1.64487	0.213325
33	2017/02/23 14:44:04	-30.572	-277.876	8069	0.072	0.416	22.838	vol0.90
34	2017/02/23 14:53:10	-30.647	-278.027	8132	0.077	0.359	23.361	vol0.90
35	2017/02/23 15:02:16	-30.621	-278.061	8325	0.08	0.377	24.801	vol0.90
36	2017/02/23 15:11:22	-30.68	-278.358	8452	0.081	0.413	26.174	vol0.90	-30.6493	-278.149	8303	0.0295691	0.182083	161.13	0.0793515	0.383657	24.8053	0.285257	0.605856	-1.6762	0.298516
37	2017/02/23 15:20:28	-30.65	-278.198	9052	0.073	0.425	26.625	vol0.95
38	2017/02/23 15:29:34	-30.681	-278.231	9146	0.073	0.417	26.206	vol0.95
39	2017/02/23 15:38:40	-30.689	-278.31	8734	0.076	0.432	26.633	vol0.95
40	2017/02/23 15:47:46	-30.652	-278.099	8767	0.071	0.386	26.472	vol0.95	-30.674	-278.213	8882.33	0.0194679	0.106604	228.937	0.0733621	0.412112	26.4376	0.26059	0.541189	-1.54353	0.188733
41	2017/02/23 16:51:33	-30.614	-277.664	9608	0.074	0.406	23.55	vol1.00
42	2017/02/23 17:00:39	-30.653	-278.12	8662	0.072	0.506	25.358	vol1.00
43	2017/02/23 17:09:45	-30.638	-278.03	9082	0.074	0.371	24.789	vol1.00
44	2017/02/23 17:18:51	-30.657	-278.069	8775	0.083	0.385	24.701	vol1.00	-30.6493	-278.073	8839.67	0.0100167	0.0451331	217.339	0.0764831	0.425011	24.951	0.285257	0.681523	-1.60053	0.0919692
45	2017/02/23 17:27:58	-30.57	-278.052	9741	0.079	0.4	26.812	vol1.05
46	2017/02/23 17:37:04	-30.577	-278.111	9983	0.073	0.394	28.091	vol1.05
47	2017/02/23 17:46:10	-30.645	-278.266	9667	0.08	0.372	29.295	vol1.05
48	2017/02/23 17:55:17	-30.655	-278.285	9840	0.072	0.407	27.553	vol1.05	-30.6257	-278.221	9830	0.0424421	0.0954481	158.237	0.0750844	0.391267	28.3224	0.308924	0.533856	-1.93753	0.352698
49	2017/02/23 18:04:24	-30.672	-278.382	9931	0.069	0.406	28.03	vol1.10
50	2017/02/23 18:13:31	-30.649	-278.342	10321	0.076	0.405	28.631	vol1.10
51	2017/02/23 18:22:37	-30.652	-278.41	10041	0.072	0.443	28.298	vol1.10
52	2017/02/23 18:31:44	-30.607	-278.196	10188	0.081	0.334	28.944	vol1.10	-30.636	-278.316	10183.3	0.0251595	0.109343	140.058	0.0764221	0.396581	28.6255	0.29859	0.438523	-1.9502	0.229059
53	2017/02/23 18:40:51	-30.681	-278.572	10770	0.072	0.391	29.291	vol1.15
54	2017/02/23 18:49:58	-30.661	-278.495	10983	0.084	0.44	30.197	vol1.15
55	2017/02/23 18:59:04	-30.669	-278.357	10600	0.072	0.434	29.895	vol1.15
56	2017/02/23 19:08:11	-30.686	-278.653	10986	0.07	0.431	30.781	vol1.15	-30.672	-278.502	10856.3	0.0127671	0.148113	221.996	0.0755866	0.435016	30.2932	0.26259	0.252856	-1.84787	0.179915
57	2017/02/23 19:17:18	-30.7	-278.585	11209	0.075	0.419	30.096	vol1.20
58	2017/02/23 19:26:25	-30.654	-278.405	10921	0.074	0.415	29.214	vol1.20
59	2017/02/23 19:35:32	-30.696	-278.632	11494	0.071	0.376	31.479	vol1.20
60	2017/02/23 19:44:40	-30.7	-278.598	10877	0.066	0.43	31.777	vol1.20	-30.6833	-278.545	11097.3	0.025482	0.12243	344.227	0.0704107	0.407636	30.8446	0.251257	0.209523	-1.80053	0.237795
61	2017/02/23 19:53:47	-30.692	-278.552	11306	0.076	0.458	30.378	vol1.25
62	2017/02/23 20:02:54	-30.681	-278.502	11242	0.074	0.374	29.661	vol1.25
63	2017/02/23 20:12:01	-30.72	-278.749	11742	0.067	0.348	31.371	vol1.25
64	2017/02/23 20:21:07	-30.657	-278.508	11351	0.076	0.398	33.237	vol1.25	-30.686	-278.586	11445	0.0317962	0.140905	262.92	0.0724362	0.373891	31.4569	0.24859	0.168189	-1.82053	0.290789
65	2017/02/23 20:30:15	-30.743	-278.848	11837	0.078	0.388	30.349	vol1.30
66	2017/02/23 20:39:22	-30.725	-278.73	12067	0.072	0.384	32.347	vol1.30
67	2017/02/23 20:48:29	-30.711	-278.745	11923	0.07	0.385	32.259	vol1.30
68	2017/02/23 20:57:36	-30.69	-278.611	11691	0.065	0.431	31.5	vol1.30	-30.7087	-278.695	11893.7	0.0176163	0.0734189	189.709	0.0690628	0.4006	32.0376	0.225924	0.0591892	-1.7482	0.158908
69	2017/02/23 21:06:44	-30.734	-278.737	12262	0.067	0.339	32.726	vol1.35
70	2017/02/23 21:15:51	-30.734	-278.729	12344	0.075	0.422	31.32	vol1.35
71	2017/02/23 21:24:58	-30.715	-278.709	12279	0.072	0.375	34.287	vol1.35
72	2017/02/23 21:34:05	-30.69	-278.633	12278	0.066	0.369	32.602	vol1.35	-30.713	-278.69	12300.3	0.0220681	0.0506491	37.8197	0.0710985	0.389388	32.7589	0.22159	0.0641892	-1.70853	0.183666
73	2017/02/23 21:43:12	-30.727	-278.763	12851	0.087	0.405	33.994	vol1.40
74	2017/02/23 21:52:20	-30.723	-278.724	12844	0.071	0.375	36.42	vol1.40
75	2017/02/23 22:01:27	-30.717	-278.823	12947	0.077	0.43	35.103	vol1.40
76	2017/02/23 22:10:34	-30.712	-278.788	12380	0.073	0.404	36.347	vol1.40	-30.7173	-278.778	12723.7	0.00550757	0.0502029	302.047	0.0737089	0.403626	35.9617	0.217257	-0.0238108	-1.76187	0.0667957
77	2017/02/23 22:19:42	-30.722	-278.646	13061	0.07	0.37	35.974	vol1.45
78	2017/02/23 22:28:50	-30.772	-278.812	13177	0.073	0.427	35.128	vol1.45
79	2017/02/23 22:37:57	-30.745	-278.907	12974	0.071	0.426	35.345	vol1.45
80	2017/02/23 22:47:04	-30.736	-278.872	13221	0.078	0.389	35.912	vol1.45	-30.751	-278.864	13124	0.018735	0.0480451	131.754	0.0740585	0.414377	35.4632	0.18359	-0.109144	-1.57787	0.157392
81	2017/02/23 23:16:19	-31.567	-271.567	418	0.609	4.413	9.908	vol1.50
82	2017/02/23 23:25:27	-30.681	-278.49	13133	0.074	0.43	30.295	vol1.50
83	2017/02/23 23:34:35	-30.74	-278.864	13394	0.081	0.365	33.495	vol1.50
84	2017/02/23 23:43:42	-30.735	-278.818	13040	0.074	0.377	33.168	vol1.50	-30.7187	-278.724	13189	0.0327159	0.203951	183.524	0.0764046	0.391686	32.3513	0.215924	0.0305226	-1.69687	0.331809
85	2017/02/23 23:52:50	-30.697	-278.732	14333	0.073	0.394	37.308	vol1.55
86	2017/02/24 00:01:58	-30.681	-278.671	13344	0.076	0.358	36.228	vol1.55
87	2017/02/24 00:11:06	-30.664	-278.689	13825	0.077	0.362	35.867	vol1.55
88	2017/02/24 00:20:14	-30.734	-278.859	13461	0.08	0.37	35.017	vol1.55	-30.693	-278.74	13543.3	0.0365103	0.103737	250.847	0.0776853	0.363368	35.7076	0.24159	0.0148559	-1.91787	0.309957
89	2017/02/24 00:29:22	-30.72	-278.748	14338	0.077	0.428	37.833	vol1.60
90	2017/02/24 00:38:30	-30.783	-279.047	14396	0.079	0.373	38.978	vol1.60
91	2017/02/24 00:47:37	-30.76	-278.907	14490	0.068	0.379	35.824	vol1.60
92	2017/02/24 00:56:45	-30.76	-278.929	14235	0.082	0.39	38.921	vol1.60	-30.7677	-278.961	14373.7	0.0132791	0.0752861	128.959	0.0765702	0.380732	37.9363	0.166924	-0.206477	-1.54187	0.130205
93	2017/02/24 01:05:53	-30.79	-279.07	14743	0.076	0.396	39.024	vol1.65
94	2017/02/24 01:15:01	-30.786	-279	14799	0.075	0.422	38.318	vol1.65
95	2017/02/24 01:24:09	-30.787	-278.997	14716	0.073	0.428	39.413	vol1.65
96	2017/02/24 01:33:17	-30.775	-279.07	14623	0.074	0.41	37.499	vol1.65	-30.7827	-279.022	14712.7	0.00665833	0.0413078	88.0473	0.0740045	0.420067	38.418	0.151924	-0.267811	-1.4832	0.0674067
97	2017/02/24 01:42:26	-30.814	-279.11	15140	0.067	0.407	37.791	vol1.70
98	2017/02/24 01:51:34	-30.772	-279.038	14707	0.074	0.358	40.715	vol1.70
99	2017/02/24 02:00:42	-30.79	-279.056	14640	0.072	0.406	38.062	vol1.70
100	2017/02/24 02:09:50	-30.786	-279.019	15057	0.075	0.439	40.939	vol1.70	-30.7827	-279.038	14801.3	0.00945163	0.0185023	223.934	0.0736772	0.402377	39.9267	0.151924	-0.283144	-1.49853	0.0778439
101	2017/02/24 02:18:59	-30.783	-279.065	15036	0.069	0.399	40.076	vol1.75
102	2017/02/24 02:28:08	-30.799	-279.176	15099	0.073	0.379	40.34	vol1.75
103	2017/02/24 02:37:16	-30.789	-279.085	15081	0.074	0.399	38.91	vol1.75
104	2017/02/24 02:46:25	-30.794	-279.091	15115	0.076	0.389	40.575	vol1.75	-30.794	-279.117	15098.3	0.005	0.0508953	17.0098	0.0743438	0.389086	39.9484	0.14059	-0.362811	-1.48753	0.0647328
105	2017/02/24 02:55:33	-30.824	-279.292	15367	0.071	0.44	40.106	vol1.80
106	2017/02/24 03:04:42	-30.8	-279.126	15333	0.076	0.462	41.192	vol1.80
107	2017/02/24 03:13:50	-30.81	-279.092	15464	0.064	0.368	37.254	vol1.80
108	2017/02/24 03:22:59	-30.805	-279.129	15787	0.074	0.423	41.982	vol1.80	-30.805	-279.116	15528	0.005	0.0205508	233.669	0.0715262	0.419443	40.1959	0.12959	-0.361144	-1.39787	0.0449704
109	2017/02/24 03:32:07	-30.839	-279.246	15978	0.074	0.392	40.916	vol1.85
110	2017/02/24 03:41:16	-30.822	-279.168	15902	0.073	0.354	43.514	vol1.85
111	2017/02/24 03:50:24	-30.819	-279.097	15819	0.074	0.478	42.266	vol1.85
112	2017/02/24 03:59:33	-30.813	-279.034	15936	0.075	0.423	42.894	vol1.85	-30.818	-279.1	15885.7	0.00458258	0.0670398	60.1858	0.0740045	0.421398	42.8944	0.11659	-0.345144	-1.27787	0.076409
113	2017/02/24 04:08:42	-30.842	-279.266	16192	0.075	0.423	44.082	vol1.90
114	2017/02/24 04:17:51	-30.844	-279.206	16458	0.071	0.445	44.138	vol1.90
115	2017/02/24 04:27:00	-30.857	-279.224	16622	0.07	0.384	44.259	vol1.90
116	2017/02/24 04:36:09	-30.834	-279.205	16157	0.084	0.415	41.053	vol1.90	-30.845	-279.212	16412.3	0.0115326	0.0106927	235.84	0.0752706	0.415414	43.1755	0.0895904	-0.457144	-1.17387	0.0928781
117	2017/02/24 04:45:18	-30.829	-279.111	17040	0.066	0.39	44.747	vol1.95
118	2017/02/24 04:54:27	-30.871	-279.295	16838	0.065	0.421	42.899	vol1.95
119	2017/02/24 05:03:36	-30.843	-279.252	17083	0.068	0.392	44.779	vol1.95
120	2017/02/24 05:12:45	-30.841	-279.172	16739	0.067	0.415	44.888	vol1.95	-30.8517	-279.24	16886.7	0.016773	0.0624206	177.088	0.0666783	0.409524	44.1981	0.0829237	-0.485144	-1.14853	0.147992
121	2017/02/24 08:00:57	-30.769	-278.203	17175	0.083	0.427	42.432	vol2.00
122	2017/02/24 08:10:06	-30.775	-278.806	18375	0.074	0.419	42.625	vol2.00
123	2017/02/24 08:19:17	-30.828	-279.053	18541	0.072	0.497	44.099	vol2.00
124	2017/02/24 08:28:26	-30.872	-279.192	18715	0.075	0.432	42.155	vol2.00	-30.825	-279.017	18543.7	0.0485695	0.195502	170.016	0.0736772	0.450627	42.9676	0.10959	-0.262477	-1.1392	0.434968
125	2017/02/24 08:37:36	-30.897	-279.304	19033	0.077	0.429	45.397	vol2.05
126	2017/02/24 08:46:46	-30.903	-279.395	18953	0.071	0.395	44.823	vol2.05
127	2017/02/24 08:55:56	-30.882	-279.398	19025	0.069	0.419	47.11	vol2.05
128	2017/02/24 09:05:05	-30.904	-279.401	18985	0.078	0.476	48.787	vol2.05	-30.8963	-279.398	18987.7	0.0124231	0.003	36.074	0.072769	0.43134	46.9348	0.0382571	-0.643477	-0.949534	0.09943
129	2017/02/24 09:14:15	-30.886	-279.28	19508	0.072	0.453	48.841	vol2.10
130	2017/02/24 09:23:24	-30.912	-279.398	19654	0.07	0.427	49.261	vol2.10
131	2017/02/24 09:32:34	-30.88	-279.357	19337	0.072	0.404	48.24	vol2.10
132	2017/02/24 09:41:44	-30.909	-279.336	19512	0.077	0.399	49.684	vol2.10	-30.9003	-279.364	19501	0.017673	0.0315331	158.786	0.0730593	0.410181	49.0654	0.0342571	-0.609144	-0.8832	0.144857
133	2017/02/24 09:50:54	-30.908	-279.408	19631	0.077	0.475	52.288	vol2.15
134	2017/02/24 10:00:04	-30.902	-279.358	19847	0.073	0.437	49.626	vol2.15
135	2017/02/24 10:09:14	-30.9	-279.433	19832	0.068	0.411	52.122	vol2.15
136	2017/02/24 10:18:23	-30.938	-279.512	20008	0.075	0.471	51.913	vol2.15	-30.9133	-279.434	19895.7	0.0213854	0.0770087	97.5722	0.0720602	0.440353	51.2328	0.0212571	-0.679811	-0.849867	0.187616
137	2017/02/24 10:27:33	-30.919	-279.484	20275	0.078	0.443	49.133	vol2.20
138	2017/02/24 10:36:43	-30.92	-279.408	20284	0.074	0.464	50.907	vol2.20
139	2017/02/24 10:45:53	-30.906	-279.381	19745	0.074	0.456	51.735	vol2.20
140	2017/02/24 10:55:02	-30.927	-279.488	20545	0.08	0.485	52.927	vol2.20	-30.9177	-279.426	20191.3	0.0106927	0.0556447	407.971	0.0760526	0.468493	51.863	0.0169237	-0.671144	-0.806534	0.102047
141	2017/02/24 11:05:10	-30.934	-279.48	20802	0.073	0.447	50.855	vol2.25
142	2017/02/24 11:15:16	-30.923	-279.445	20586	0.071	0.463	55.263	vol2.25
143	2017/02/24 11:25:23	-30.944	-279.426	20878	0.088	0.445	50.782	vol2.25
144	2017/02/24 11:35:29	-30.921	-279.427	20484	0.074	0.425	50.013	vol2.25	-30.9293	-279.433	20649.3	0.012741	0.0106927	204.493	0.0780192	0.444604	52.0708	0.00525705	-0.678144	-0.7202	0.102487
145	2017/02/24 11:44:39	-30.954	-279.518	21048	0.076	0.418	52.119	vol2.30
146	2017/02/24 11:53:50	-30.949	-279.504	20878	0.073	0.447	53.637	vol2.30
147	2017/02/24 12:03:00	-30.939	-279.51	21115	0.064	0.413	52.305	vol2.30
148	2017/02/24 12:12:10	-30.942	-279.512	21138	0.068	0.424	53.461	vol2.30	-30.9433	-279.509	21043.7	0.0051316	0.00416333	143.932	0.0684324	0.428234	53.1376	-0.00874295	-0.754144	-0.6842	0.0412634
149	2017/02/24 12:22:17	-30.953	-279.541	21544	0.077	0.459	57.602	vol2.35
150	2017/02/24 12:32:23	-30.941	-279.47	20918	0.076	0.429	52.566	vol2.35
151	2017/02/24 12:42:30	-30.962	-279.612	21495	0.078	0.483	58.847	vol2.35
152	2017/02/24 12:52:36	-30.968	-279.469	21235	0.075	0.464	55.035	vol2.35	-30.957	-279.517	21216	0.0141774	0.0822739	288.969	0.0763435	0.459212	55.5428	-0.0224096	-0.762477	-0.5832	0.140118
153	2017/02/24 13:01:47	-30.987	-279.538	21850	0.073	0.474	56.103	vol2.40
154	2017/02/24 13:10:58	-30.99	-279.599	21863	0.069	0.42	54.088	vol2.40
155	2017/02/24 13:20:09	-30.975	-279.562	21723	0.076	0.427	57.032	vol2.40
156	2017/02/24 13:29:19	-30.937	-279.443	21337	0.081	0.43	52.833	vol2.40	-30.9673	-279.535	21641	0.0273191	0.0815128	272.419	0.0754939	0.425687	54.6793	-0.0327429	-0.780144	-0.5182	0.233259
157	2017/02/24 13:39:27	-30.99	-279.563	22723	0.07	0.471	54.765	vol2.50
158	2017/02/24 13:49:34	-30.964	-279.585	22668	0.074	0.468	51.652	vol2.50
159	2017/02/24 13:59:42	-30.977	-279.585	22717	0.077	0.427	58.153	vol2.50
160	2017/02/24 14:09:49	-30.97	-279.604	22762	0.075	0.513	61.962	vol2.50	-30.9703	-279.591	22715.7	0.00650641	0.0109697	47.0142	0.0753437	0.470646	57.4137	-0.0357429	-0.836811	-0.550867	0.0531946
																	reference_20000_ppmv	-30.9346	-278.755

## Sheet: exp1_MIX_raw
Line	Time Code	d(18_16)Mean	d(D_H)Mean	H2O_Mean	d(18_16)_SD	d(D_H)_SD	H2O_SD	Method	d(18_16)_avg	d(D_H)_avg	H2O_avg	d(18_16)_SDM	d(D_H)_SDM	H2O_SDM	d(18_16)_SD_rms	d(D_H)_SD_rms	H2O_SD_rms
13	2017/03/12 01:38:12	-22.883	-202.039	18619	0.073	0.488	47.356	vol2.00
14	2017/03/12 01:47:21	-22.87	-202.005	18658	0.078	0.463	49.25	vol2.00
15	2017/03/12 01:56:30	-22.887	-202.257	18512	0.077	0.454	47.445	vol2.00
16	2017/03/12 02:05:40	-22.845	-202.006	18666	0.069	0.507	47.926	vol2.00	-22.8673	-202.089	18612	0.0211266	0.145204	86.6949	0.0747752	0.475231	48.213
17	2017/03/12 02:14:44	-23.746	-195.745	576	0.487	3.864	19.837	vol0.05
18	2017/03/12 02:23:47	-23.469	-194.889	515	0.533	3.648	15.061	vol0.05
19	2017/03/12 02:32:51	-23.325	-195.392	475	0.521	4.214	12.855	vol0.05
20	2017/03/12 02:41:54	-23.454	-194.468	473	0.516	4.033	11.523	vol0.05	-23.416	-194.916	487.667	0.0791644	0.462606	23.6925	0.523382	3.97202	13.227
21	2017/03/12 02:50:58	-22.919	-197.458	932	0.335	2.025	12.952	vol0.10
22	2017/03/12 03:00:02	-22.883	-197.461	920	0.332	2.402	12.251	vol0.10
23	2017/03/12 03:09:06	-22.908	-198.157	906	0.309	2.115	11.833	vol0.10
24	2017/03/12 03:18:10	-22.917	-197.956	902	0.326	2.528	11.702	vol0.10	-22.9027	-197.858	909.333	0.0176163	0.3582	9.45163	0.32248	2.35468	11.931
25	2017/03/12 03:27:15	-22.752	-198.819	1331	0.239	1.563	12.625	vol0.15
26	2017/03/12 03:36:19	-22.756	-199.323	1345	0.194	1.452	12.848	vol0.15
27	2017/03/12 03:45:23	-22.771	-199.172	1348	0.22	1.605	12.135	vol0.15
28	2017/03/12 03:54:26	-22.724	-199.161	1344	0.226	1.462	11.944	vol0.15	-22.7503	-199.219	1345.67	0.0240069	0.0905226	2.08167	0.213785	1.50795	12.3151
29	2017/03/12 04:03:31	-22.691	-199.984	1833	0.201	1.17	13.217	vol0.20
30	2017/03/12 04:12:35	-22.709	-199.926	1844	0.17	1.096	13.276	vol0.20
31	2017/03/12 04:21:39	-22.706	-200.272	1851	0.194	1.091	13.33	vol0.20
32	2017/03/12 04:30:43	-22.734	-200.175	1869	0.167	1	13.397	vol0.20	-22.7163	-200.124	1854.67	0.0153731	0.178478	12.897	0.177412	1.06325	13.3344
33	2017/03/12 04:39:48	-22.689	-200.493	2271	0.161	1.006	14.386	vol0.25
34	2017/03/12 04:48:52	-22.68	-200.529	2236	0.16	1.018	13.669	vol0.25
35	2017/03/12 04:57:57	-22.678	-200.496	2237	0.137	0.955	14.121	vol0.25
36	2017/03/12 05:07:02	-22.69	-200.568	2237	0.139	0.941	14.184	vol0.25	-22.6827	-200.531	2236.67	0.0064291	0.0360416	0.57735	0.145705	0.97191	13.9932
37	2017/03/12 05:16:06	-22.658	-200.737	2725	0.125	0.852	14.437	vol0.30
38	2017/03/12 05:25:11	-22.642	-200.969	2768	0.116	0.811	14.929	vol0.30
39	2017/03/12 05:34:15	-22.637	-200.961	2773	0.138	0.801	15.234	vol0.30
40	2017/03/12 05:43:19	-22.666	-201.037	2727	0.145	0.766	14.706	vol0.30	-22.6483	-200.989	2756	0.0155027	0.0417612	25.2389	0.133573	0.792901	14.9579
41	2017/03/12 05:52:23	-22.641	-200.963	3239	0.12	0.754	15.877	vol0.35
42	2017/03/12 06:01:28	-22.652	-201.197	3306	0.122	0.741	16.366	vol0.35
43	2017/03/12 06:10:33	-22.636	-200.998	3292	0.126	0.663	15.823	vol0.35
44	2017/03/12 06:19:38	-22.63	-201.141	3210	0.117	0.691	16.26	vol0.35	-22.6393	-201.112	3269.33	0.0113725	0.102621	51.8588	0.121722	0.699078	16.1514
45	2017/03/12 06:28:42	-22.647	-201.429	3754	0.118	0.643	17.263	vol0.40
46	2017/03/12 06:37:47	-22.63	-201.387	3845	0.108	0.597	17.394	vol0.40
47	2017/03/12 06:46:52	-22.641	-201.373	3853	0.117	0.66	17.579	vol0.40
48	2017/03/12 06:55:57	-22.666	-201.466	3938	0.106	0.632	17.386	vol0.40	-22.6457	-201.409	3878.67	0.0184481	0.0501431	51.5396	0.110437	0.630194	17.4532
49	2017/03/12 07:05:02	-22.629	-201.547	4136	0.113	0.567	17.194	vol0.45
50	2017/03/12 07:14:07	-22.63	-201.502	4241	0.108	0.569	18.851	vol0.45
51	2017/03/12 07:23:13	-22.63	-201.489	4298	0.096	0.612	18.674	vol0.45
52	2017/03/12 07:32:18	-22.64	-201.598	4355	0.102	0.614	18.63	vol0.45	-22.6333	-201.53	4298	0.0057735	0.0595343	57	0.102118	0.598693	18.7186
53	2017/03/12 10:15:27	-22.433	-198.275	5037	0.097	0.45	17.458	vol0.50
54	2017/03/12 10:24:34	-22.58	-200.614	4853	0.1	0.537	17.518	vol0.50
55	2017/03/12 10:33:40	-22.596	-201.09	4872	0.093	0.544	18.985	vol0.50
56	2017/03/12 10:42:45	-22.591	-201.259	4830	0.095	0.52	18.022	vol0.50	-22.589	-200.988	4851.67	0.00818535	0.334455	21.0317	0.0960451	0.533762	18.1852
57	2017/03/12 10:51:50	-22.611	-201.337	5361	0.096	0.46	20.648	vol0.55
58	2017/03/12 11:00:56	-22.6	-201.52	5343	0.095	0.508	19.429	vol0.55
59	2017/03/12 11:10:01	-22.615	-201.684	5342	0.098	0.496	20.922	vol0.55
60	2017/03/12 11:19:07	-22.594	-201.514	5436	0.083	0.536	19.384	vol0.55	-22.603	-201.573	5373.67	0.0108167	0.0964642	53.9846	0.092228	0.513607	19.9245
61	2017/03/12 11:28:12	-22.639	-201.806	5830	0.099	0.457	21.244	vol0.60
62	2017/03/12 11:37:18	-22.605	-201.682	5846	0.091	0.507	21.959	vol0.60
63	2017/03/12 11:46:24	-22.62	-201.855	5829	0.083	0.481	21.512	vol0.60
64	2017/03/12 11:55:29	-22.641	-201.827	5868	0.089	0.475	22.359	vol0.60	-22.622	-201.788	5847.67	0.0180831	0.0928601	19.5533	0.0877325	0.487864	21.9461
65	2017/03/12 12:04:35	-22.601	-201.855	6302	0.081	0.445	22.178	vol0.65
66	2017/03/12 12:13:40	-22.62	-201.94	6302	0.081	0.386	21.378	vol0.65
67	2017/03/12 12:22:45	-22.602	-201.893	6316	0.087	0.425	22.118	vol0.65
68	2017/03/12 12:31:51	-22.617	-201.85	6300	0.077	0.473	22.422	vol0.65	-22.613	-201.894	6306	0.00964365	0.0450148	8.7178	0.08177	0.429476	21.977
69	2017/03/12 12:40:56	-22.598	-201.919	6637	0.089	0.42	22.259	vol0.70
70	2017/03/12 12:50:03	-22.627	-201.979	6638	0.084	0.455	23.332	vol0.70
71	2017/03/12 12:59:08	-22.612	-202.003	6631	0.087	0.453	22.63	vol0.70
72	2017/03/12 13:08:14	-22.632	-202.034	6622	0.075	0.449	22.595	vol0.70	-22.6237	-202.005	6630.33	0.0104083	0.0275741	8.02081	0.0821584	0.45234	22.8549
73	2017/03/12 13:17:20	-22.63	-201.982	7192	0.086	0.437	24.939	vol0.75
74	2017/03/12 13:26:26	-22.648	-201.972	6878	0.076	0.459	23.298	vol0.75
75	2017/03/12 13:35:31	-22.612	-201.983	7038	0.075	0.462	24.369	vol0.75
76	2017/03/12 13:44:37	-22.625	-202.066	7051	0.083	0.45	22.674	vol0.75	-22.6283	-202.007	6989	0.01823	0.0513907	96.3483	0.0780812	0.457028	23.4574
77	2017/03/12 13:53:43	-22.637	-202.175	7516	0.078	0.425	24.031	vol0.80
78	2017/03/12 14:02:50	-22.638	-202.104	7533	0.078	0.429	26.575	vol0.80
79	2017/03/12 14:11:56	-22.658	-202.138	7511	0.087	0.412	24.628	vol0.80
80	2017/03/12 14:21:02	-22.643	-202.127	7533	0.082	0.437	25.186	vol0.80	-22.6463	-202.123	7525.67	0.0104083	0.0173494	12.7017	0.0824156	0.426128	25.4762
81	2017/03/12 14:30:08	-22.65	-202.248	7980	0.068	0.407	23.612	vol0.85
82	2017/03/12 14:39:14	-22.656	-202.184	8322	0.073	0.399	25.709	vol0.85
83	2017/03/12 14:48:20	-22.653	-202.17	7711	0.071	0.404	25.334	vol0.85
84	2017/03/12 14:57:27	-22.626	-202.092	7998	0.076	0.418	24.918	vol0.85	-22.645	-202.149	8010.33	0.0165227	0.0495715	305.687	0.0733621	0.407079	25.3224
85	2017/03/12 15:06:33	-22.628	-202.158	8473	0.083	0.419	26.769	vol0.90
86	2017/03/12 15:15:40	-22.663	-202.255	8441	0.084	0.409	27.165	vol0.90
87	2017/03/12 15:24:46	-22.658	-202.2	8261	0.082	0.428	27.646	vol0.90
88	2017/03/12 15:33:52	-22.644	-202.281	8479	0.088	0.415	26.858	vol0.90	-22.655	-202.245	8393.67	0.00984886	0.0413562	116.453	0.0847034	0.417409	27.2249
89	2017/03/12 15:42:59	-22.664	-202.271	8986	0.089	0.433	27.375	vol0.95
90	2017/03/12 15:52:06	-22.673	-202.368	9016	0.084	0.395	27.122	vol0.95
91	2017/03/12 16:01:12	-22.65	-202.25	8999	0.079	0.404	28.738	vol0.95
92	2017/03/12 16:10:19	-22.658	-202.244	8983	0.08	0.369	28.164	vol0.95	-22.6603	-202.287	8999.33	0.0116762	0.0699238	16.5025	0.0810288	0.389616	28.016
93	2017/03/12 16:43:09	-22.637	-202.014	9575	0.075	0.42	28.05	vol1.00
94	2017/03/12 16:52:16	-22.659	-202.279	9266	0.081	0.443	28.046	vol1.00
95	2017/03/12 17:01:22	-22.628	-202.161	9531	0.078	0.388	25.57	vol1.00
96	2017/03/12 17:10:28	-22.669	-202.329	9533	0.077	0.397	29.448	vol1.00	-22.652	-202.256	9443.33	0.0213776	0.0862632	153.578	0.078685	0.410041	27.7344
97	2017/03/12 17:19:35	-22.667	-202.181	10010	0.073	0.421	30.653	vol1.05
98	2017/03/12 17:28:42	-22.657	-202.306	9928	0.068	0.38	30.947	vol1.05
99	2017/03/12 17:37:48	-22.639	-202.227	9686	0.083	0.439	30.494	vol1.05
100	2017/03/12 17:46:54	-22.671	-202.259	9927	0.074	0.407	31.173	vol1.05	-22.6557	-202.264	9847	0.0160416	0.0397366	139.431	0.0752529	0.409378	30.8726
101	2017/03/12 17:56:01	-22.671	-202.339	10402	0.076	0.403	29.014	vol1.10
102	2017/03/12 18:05:08	-22.678	-202.471	10418	0.079	0.394	29.96	vol1.10
103	2017/03/12 18:14:15	-22.675	-202.333	10615	0.089	0.398	30.792	vol1.10
104	2017/03/12 18:23:22	-22.693	-202.415	10143	0.081	0.456	31.48	vol1.10	-22.682	-202.406	10392	0.00964365	0.069407	237.072	0.0831124	0.416964	30.7503
105	2017/03/12 18:32:29	-22.696	-202.448	10873	0.082	0.438	32.485	vol1.15
106	2017/03/12 18:41:36	-22.702	-202.446	11054	0.073	0.403	32.298	vol1.15
107	2017/03/12 18:50:43	-22.684	-202.528	10944	0.071	0.409	30.732	vol1.15
108	2017/03/12 18:59:50	-22.668	-202.451	10825	0.072	0.408	31.484	vol1.15	-22.6847	-202.475	10941	0.0170098	0.0459674	114.529	0.0720046	0.406675	31.5112
109	2017/03/12 19:08:57	-22.73	-202.488	11292	0.076	0.417	32.944	vol1.20
110	2017/03/12 19:18:03	-22.7	-202.469	11072	0.07	0.407	32.857	vol1.20
111	2017/03/12 19:27:11	-22.7	-202.391	11342	0.072	0.422	33.508	vol1.20
112	2017/03/12 19:36:18	-22.731	-202.521	11279	0.081	0.448	33.158	vol1.20	-22.7103	-202.46	11231	0.0178979	0.0654319	141.255	0.0744871	0.426004	33.1754
113	2017/03/12 19:45:26	-22.715	-202.476	11973	0.075	0.399	32.359	vol1.25
114	2017/03/12 19:54:33	-22.715	-202.462	11692	0.069	0.391	34.054	vol1.25
115	2017/03/12 20:03:41	-22.734	-202.596	11742	0.072	0.378	35.029	vol1.25
116	2017/03/12 20:12:49	-22.73	-202.535	11510	0.07	0.416	31.753	vol1.25	-22.7263	-202.531	11648	0.0100167	0.0670895	122.098	0.0703444	0.395315	33.64
117	2017/03/12 20:21:56	-22.738	-202.446	12344	0.069	0.416	34.875	vol1.30
118	2017/03/12 20:31:04	-22.722	-202.552	11998	0.069	0.431	35.333	vol1.30
119	2017/03/12 20:40:12	-22.742	-202.494	12387	0.076	0.396	34.918	vol1.30
120	2017/03/12 20:49:19	-22.739	-202.515	12270	0.074	0.361	33.751	vol1.30	-22.7343	-202.52	12218.3	0.0107858	0.0293655	199.58	0.0730593	0.39703	34.6738
121	2017/03/12 20:58:27	-22.759	-202.633	12480	0.066	0.411	33.6	vol1.35
122	2017/03/12 21:07:35	-22.738	-202.616	12755	0.073	0.439	37.132	vol1.35
123	2017/03/12 21:16:42	-22.74	-202.617	12464	0.073	0.413	34.974	vol1.35
124	2017/03/12 21:25:50	-22.752	-202.641	12635	0.069	0.421	34.475	vol1.35	-22.7433	-202.625	12618	0.00757188	0.0141539	146.243	0.0716915	0.424473	35.5457
125	2017/03/12 21:34:58	-22.762	-202.69	12936	0.075	0.417	34.289	vol1.40
126	2017/03/12 21:44:06	-22.77	-202.695	13161	0.074	0.394	37.761	vol1.40
127	2017/03/12 21:53:14	-22.773	-202.682	13110	0.068	0.389	37.705	vol1.40
128	2017/03/12 22:02:22	-22.811	-202.86	13262	0.066	0.425	35.487	vol1.40	-22.7847	-202.746	13177.7	0.0228546	0.0992287	77.3585	0.0694166	0.402981	36.9995
129	2017/03/12 22:11:29	-22.768	-202.724	13362	0.068	0.377	38.789	vol1.45
130	2017/03/12 22:20:37	-22.767	-202.701	13585	0.07	0.385	37.265	vol1.45
131	2017/03/12 22:29:46	-22.761	-202.707	13668	0.073	0.383	36.678	vol1.45
132	2017/03/12 22:38:54	-22.801	-202.782	13392	0.065	0.377	37.324	vol1.45	-22.7763	-202.73	13548.3	0.0215716	0.0451331	141.606	0.0694118	0.381682	37.0901
133	2017/03/12 23:24:04	-22.749	-202.485	14216	0.072	0.363	35.815	vol1.50
134	2017/03/12 23:33:12	-22.775	-202.634	13946	0.073	0.458	36.321	vol1.50
135	2017/03/12 23:42:20	-22.766	-202.779	14090	0.068	0.368	37.149	vol1.50
136	2017/03/12 23:51:28	-22.764	-202.67	14255	0.074	0.384	37.998	vol1.50	-22.7683	-202.694	14097	0.00585947	0.0755006	154.619	0.0717147	0.405234	37.1623
137	2017/03/13 00:00:36	-22.791	-202.724	14313	0.081	0.41	35.937	vol1.55
138	2017/03/13 00:09:44	-22.807	-202.783	14551	0.078	0.42	38.193	vol1.55
139	2017/03/13 00:18:53	-22.801	-202.74	14390	0.078	0.39	37.916	vol1.55
140	2017/03/13 00:28:02	-22.793	-202.715	14647	0.068	0.389	40.1	vol1.55	-22.8003	-202.746	14529.3	0.00702377	0.0343948	129.863	0.0748153	0.399925	38.7485
141	2017/03/13 00:37:10	-22.814	-202.849	14928	0.074	0.4	39.522	vol1.60
142	2017/03/13 00:46:19	-22.796	-202.675	14974	0.07	0.394	39.203	vol1.60
143	2017/03/13 00:55:28	-22.788	-202.74	14802	0.07	0.416	40.634	vol1.60
144	2017/03/13 01:04:37	-22.79	-202.745	14991	0.07	0.382	38.468	vol1.60	-22.7913	-202.72	14922.3	0.00416333	0.0390512	104.558	0.07	0.397583	39.4453
145	2017/03/13 01:13:45	-22.805	-202.756	15611	0.066	0.417	40.654	vol1.65
146	2017/03/13 01:22:54	-22.798	-202.742	15445	0.077	0.423	43.023	vol1.65
147	2017/03/13 01:32:02	-22.824	-202.794	15451	0.069	0.36	41.146	vol1.65
148	2017/03/13 01:41:11	-22.81	-202.727	15514	0.077	0.373	43.977	vol1.65	-22.8107	-202.754	15470	0.0130128	0.0351615	38.223	0.0744289	0.386289	42.7315
149	2017/03/13 01:50:20	-22.815	-202.721	15837	0.068	0.383	40.454	vol1.70
150	2017/03/13 01:59:29	-22.759	-202.66	15718	0.067	0.404	40.98	vol1.70
151	2017/03/13 02:08:39	-22.814	-202.728	15931	0.075	0.386	42.651	vol1.70
152	2017/03/13 02:17:47	-22.813	-202.812	16096	0.074	0.397	41.838	vol1.70	-22.7953	-202.733	15915	0.0314696	0.0761402	189.507	0.0720879	0.395736	41.8286
153	2017/03/13 02:26:56	-22.82	-202.788	16122	0.073	0.416	42.534	vol1.75
154	2017/03/13 02:36:05	-22.829	-202.703	16321	0.072	0.4	41.048	vol1.75
155	2017/03/13 02:45:14	-22.858	-202.789	16515	0.073	0.441	44.103	vol1.75
156	2017/03/13 02:54:23	-22.856	-202.819	16263	0.076	0.357	42.759	vol1.75	-22.8477	-202.77	16366.3	0.0161967	0.0602107	131.975	0.0736863	0.400803	42.655
157	2017/03/13 03:03:31	-22.853	-202.757	16665	0.072	0.462	43.65	vol1.80
158	2017/03/13 03:12:41	-22.862	-202.831	16737	0.067	0.417	42.985	vol1.80
159	2017/03/13 03:21:49	-22.864	-202.817	16941	0.074	0.453	45.362	vol1.80
160	2017/03/13 03:30:58	-22.844	-202.856	16498	0.082	0.387	46.67	vol1.80	-22.8567	-202.835	16725.3	0.0110151	0.0197569	221.73	0.0745855	0.419868	45.0315
161	2017/03/13 03:40:07	-22.871	-202.856	17367	0.079	0.447	44.389	vol1.85
162	2017/03/13 03:49:16	-22.854	-202.85	17214	0.08	0.379	45.017	vol1.85
163	2017/03/13 03:58:25	-22.858	-202.774	17059	0.077	0.417	44.525	vol1.85
164	2017/03/13 04:07:33	-22.868	-202.846	17346	0.07	0.429	48.391	vol1.85	-22.86	-202.823	17206.3	0.0072111	0.0427707	143.654	0.0757826	0.408889	46.0098
165	2017/03/13 04:16:43	-22.861	-202.895	17477	0.074	0.376	43.428	vol1.90
166	2017/03/13 04:25:52	-22.874	-202.89	17656	0.072	0.351	45.026	vol1.90
167	2017/03/13 04:35:01	-22.911	-203.048	17743	0.071	0.413	45.218	vol1.90
168	2017/03/13 04:44:10	-22.901	-202.974	17526	0.076	0.405	45.067	vol1.90	-22.8953	-202.971	17641.7	0.0191398	0.0790527	109.208	0.073032	0.390638	45.1037
169	2017/03/13 04:53:20	-22.906	-203	18180	0.078	0.407	48.072	vol1.95
170	2017/03/13 05:02:30	-22.867	-202.817	17954	0.076	0.444	49.061	vol1.95
171	2017/03/13 05:11:40	-22.903	-202.888	18146	0.081	0.438	48.61	vol1.95
172	2017/03/13 05:20:49	-22.874	-202.857	17891	0.071	0.394	46.857	vol1.95	-22.8813	-202.854	17997	0.0190875	0.0355949	132.827	0.0761096	0.425917	48.1854
173	2017/03/13 07:57:47	-22.85	-202.081	18849	0.068	0.444	39.157	vol2.00
174	2017/03/13 08:06:57	-22.89	-202.744	18419	0.079	0.445	42.292	vol2.00
175	2017/03/13 08:16:06	-22.869	-202.739	18265	0.076	0.426	41.691	vol2.00
176	2017/03/13 08:25:16	-22.894	-202.913	18608	0.068	0.414	43.114	vol2.00	-22.8843	-202.799	18430.7	0.0134288	0.0990471	171.797	0.0744782	0.428523	42.3697
177	2017/03/13 08:34:26	-22.898	-202.848	18864	0.069	0.391	45.593	vol2.05
178	2017/03/13 08:43:36	-22.868	-202.803	18703	0.066	0.404	48.37	vol2.05
179	2017/03/13 08:52:45	-22.895	-202.833	19390	0.068	0.419	49.036	vol2.05
180	2017/03/13 09:01:55	-22.907	-202.844	19098	0.071	0.453	44.283	vol2.05	-22.89	-202.827	19063.7	0.019975	0.0212211	344.784	0.0683642	0.425827	47.2764
181	2017/03/13 09:11:06	-22.926	-202.945	19517	0.073	0.439	48.577	vol2.10
182	2017/03/13 09:20:16	-22.884	-202.777	19439	0.074	0.396	46.49	vol2.10
183	2017/03/13 09:29:26	-22.91	-202.9	19558	0.073	0.442	49.006	vol2.10
184	2017/03/13 09:38:36	-22.896	-202.827	19376	0.075	0.418	47.118	vol2.10	-22.8967	-202.835	19457.7	0.0130128	0.0618574	92.4247	0.0740045	0.419088	47.55
185	2017/03/13 09:47:46	-22.935	-202.897	19955	0.08	0.47	47.535	vol2.15
186	2017/03/13 09:56:57	-22.923	-202.835	20055	0.081	0.47	52.056	vol2.15
187	2017/03/13 10:06:07	-22.912	-202.783	19992	0.075	0.387	50.497	vol2.15
188	2017/03/13 10:15:17	-22.913	-202.766	19754	0.07	0.402	51.236	vol2.15	-22.916	-202.795	19933.7	0.00608276	0.035949	158.752	0.0754674	0.421218	51.267
189	2017/03/13 10:24:27	-22.932	-202.887	20360	0.074	0.442	54.088	vol2.20
190	2017/03/13 10:33:37	-22.919	-202.882	20381	0.077	0.463	53.303	vol2.20
191	2017/03/13 10:42:48	-22.933	-202.918	20271	0.064	0.45	53.166	vol2.20
192	2017/03/13 10:51:59	-22.947	-203.005	20274	0.073	0.457	54.814	vol2.20	-22.933	-202.935	20308.7	0.014	0.0632376	62.6605	0.0715402	0.456698	53.7662
193	2017/03/13 11:01:09	-22.959	-202.846	20688	0.078	0.498	54.597	vol2.25
194	2017/03/13 11:10:20	-22.934	-202.912	20812	0.083	0.431	55.233	vol2.25
195	2017/03/13 11:19:31	-22.957	-202.882	20720	0.072	0.434	52.345	vol2.25
196	2017/03/13 11:28:42	-22.968	-202.969	20880	0.073	0.466	54.03	vol2.25	-22.953	-202.921	20804	0.0173494	0.0441928	80.2994	0.0761621	0.443949	53.8824
197	2017/03/13 11:37:52	-22.959	-202.948	21301	0.071	0.475	52.554	vol2.30
198	2017/03/13 11:47:04	-22.962	-202.965	21307	0.076	0.439	54.349	vol2.30
199	2017/03/13 11:56:14	-22.962	-202.901	21346	0.067	0.439	56.362	vol2.30
200	2017/03/13 12:05:25	-22.977	-202.924	21254	0.078	0.462	57.55	vol2.30	-22.967	-202.93	21302.3	0.00866025	0.0324191	46.1772	0.0738219	0.446798	56.1026
201	2017/03/13 12:14:36	-22.959	-202.919	22130	0.079	0.411	58.186	vol2.40
202	2017/03/13 12:23:47	-23.005	-203.027	22257	0.074	0.426	55.751	vol2.40
203	2017/03/13 12:32:57	-22.988	-202.98	22208	0.082	0.464	54.499	vol2.40
204	2017/03/13 12:42:08	-22.963	-202.849	22070	0.084	0.473	59.065	vol2.40	-22.9853	-202.952	22178.3	0.0211266	0.0922442	96.9656	0.0801166	0.45479	56.4712
205	2017/03/13 12:51:19	-22.998	-202.936	23094	0.078	0.496	57.352	vol2.50
206	2017/03/13 13:00:30	-22.997	-203.001	23059	0.078	0.477	60.502	vol2.50
207	2017/03/13 13:09:41	-23.026	-202.961	23185	0.076	0.438	59.457	vol2.50
208	2017/03/13 13:18:52	-23.007	-203.022	22965	0.078	0.497	59.511	vol2.50	-23.01	-202.995	23069.7	0.0147309	0.0309892	110.387	0.0773391	0.471304	59.8253
209	2017/03/13 13:28:02	-22.931	-203.001	18851	0.07	0.437	51.266	vol2.00
210	2017/03/13 13:37:11	-22.905	-202.885	18484	0.078	0.413	49.669	vol2.00
211	2017/03/13 13:46:21	-22.904	-202.923	18465	0.066	0.387	51.609	vol2.00
212	2017/03/13 13:55:31	-22.907	-202.96	18709	0.076	0.421	51.623	vol2.00	-22.9053	-202.923	18552.7	0.00152753	0.0375011	135.722	0.073521	0.407259	50.9753

## Sheet: exp1_VATS_raw
Line	Time Code	d(18_16)Mean	d(D_H)Mean	H2O_Mean	d(18_16)_SD	d(D_H)_SD	H2O_SD	Method	d(18_16)_avg	d(D_H)_avg	H2O_avg	d(18_16)_SDM	d(D_H)_SDM	H2O_SDM	d(18_16)_SD_rms	d(D_H)_SD_rms	H2O_SD_rms
13	2017/03/13 16:12:56	-15.939	-131.49	18699	0.079	0.431	49.117	vol2.00
14	2017/03/13 16:22:05	-15.956	-131.563	18518	0.078	0.422	49.001	vol2.00
15	2017/03/13 16:31:15	-15.954	-131.604	18539	0.081	0.389	48.504	vol2.00
16	2017/03/13 16:40:25	-15.944	-131.525	18255	0.066	0.39	49.375	vol2.00	-15.9513	-131.564	18437.3	0.0064291	0.0395095	158.254	0.0752795	0.400627	48.9613
21	2017/03/13 17:26:49	-16.708	-134.563	934	0.343	2.364	13.476	vol0.10
22	2017/03/13 17:35:52	-16.502	-134.489	935	0.323	1.936	12.991	vol0.10
23	2017/03/13 17:44:56	-16.504	-134.22	936	0.312	2.229	12.654	vol0.10
24	2017/03/13 17:54:01	-16.577	-134.33	937	0.305	2.103	12.358	vol0.10	-16.5277	-134.346	936	0.0427356	0.135242	1	0.313421	2.09278	12.6703
25	2017/03/13 18:03:05	-16.211	-133.463	1352	0.238	1.449	13.157	vol0.15
26	2017/03/13 18:12:09	-16.188	-133.488	1360	0.236	1.439	13.163	vol0.15
27	2017/03/13 18:21:13	-16.125	-133.321	1360	0.233	1.644	12.916	vol0.15
28	2017/03/13 18:30:17	-16.115	-133.236	1338	0.218	1.317	12.841	vol0.15	-16.1427	-133.348	1352.67	0.0395769	0.128204	12.7017	0.229135	1.47286	12.9741
29	2017/03/13 18:39:21	-16.004	-132.88	1827	0.167	1.121	13.738	vol0.20
30	2017/03/13 18:48:26	-15.977	-133.028	1879	0.161	1.194	14.135	vol0.20
31	2017/03/13 18:57:30	-15.994	-132.838	1880	0.162	1.128	13.682	vol0.20
32	2017/03/13 19:06:35	-15.968	-132.772	1876	0.193	0.916	13.786	vol0.20	-15.9797	-132.879	1878.33	0.0132035	0.132911	2.08167	0.17264	1.08583	13.869
33	2017/03/13 19:15:40	-15.883	-132.595	2284	0.149	0.842	14.149	vol0.25
34	2017/03/13 19:24:45	-15.905	-132.765	2282	0.154	0.834	14.698	vol0.25
35	2017/03/13 19:33:49	-15.923	-132.6	2287	0.148	0.881	14.557	vol0.25
36	2017/03/13 19:42:54	-15.883	-132.629	2281	0.155	0.89	14.362	vol0.25	-15.9037	-132.665	2283.33	0.0200333	0.0880928	3.21455	0.152365	0.86868	14.5397
37	2017/03/13 19:51:58	-15.871	-132.543	2810	0.129	0.751	16.064	vol0.30
38	2017/03/13 20:01:03	-15.863	-132.46	2816	0.139	0.785	15.449	vol0.30
39	2017/03/13 20:10:08	-15.869	-132.532	2768	0.132	0.795	15.427	vol0.30
40	2017/03/13 20:19:13	-15.843	-132.392	2828	0.131	0.744	16.043	vol0.30	-15.8583	-132.461	2804	0.0136137	0.0700095	31.749	0.134047	0.774981	15.6423
41	2017/03/13 20:28:18	-15.788	-132.281	3313	0.117	0.637	16.654	vol0.35
42	2017/03/13 20:37:23	-15.79	-132.325	3326	0.105	0.624	16.986	vol0.35
43	2017/03/13 20:46:28	-15.81	-132.267	3259	0.119	0.683	17.069	vol0.35
44	2017/03/13 20:55:33	-15.811	-132.104	3330	0.114	0.642	16.837	vol0.35	-15.8037	-132.232	3305	0.0118462	0.114582	39.8873	0.112815	0.650136	16.9643
45	2017/03/13 21:04:38	-15.807	-132.21	3674	0.112	0.613	16.896	vol0.40
46	2017/03/13 21:13:43	-15.765	-132.132	3802	0.113	0.599	18.131	vol0.40
47	2017/03/13 21:22:48	-15.757	-132.06	3763	0.118	0.618	17.616	vol0.40
48	2017/03/13 21:31:54	-15.77	-132.078	3878	0.097	0.543	18.168	vol0.40	-15.764	-132.09	3814.33	0.00655744	0.03747	58.4836	0.1097	0.58753	17.9734
49	2017/03/13 21:40:59	-15.751	-132.002	4132	0.106	0.542	18.925	vol0.45
50	2017/03/13 21:50:04	-15.744	-132.05	4191	0.104	0.529	18.459	vol0.45
51	2017/03/13 21:59:10	-15.754	-132.039	4318	0.105	0.537	18.669	vol0.45
52	2017/03/13 22:08:15	-15.748	-131.991	4353	0.108	0.495	19.296	vol0.45	-15.7487	-132.027	4287.33	0.00503322	0.0313741	85.2428	0.10568	0.520652	18.8114
53	2017/03/13 22:25:44	-15.751	-131.963	4897	0.104	0.484	19.97	vol0.50
54	2017/03/13 22:34:50	-15.705	-131.708	4794	0.091	0.497	19.273	vol0.50
55	2017/03/13 22:43:54	-15.717	-131.87	4820	0.1	0.533	19.442	vol0.50
56	2017/03/13 22:53:00	-15.695	-131.611	4887	0.104	0.51	19.691	vol0.50	-15.7057	-131.73	4833.67	0.0110151	0.130852	47.9826	0.0984835	0.513549	19.4694
57	2017/03/13 23:02:05	-15.695	-131.562	5406	0.09	0.486	20.833	vol0.55
58	2017/03/13 23:11:10	-15.73	-131.777	5370	0.087	0.475	20.974	vol0.55
59	2017/03/13 23:20:16	-15.712	-131.709	5372	0.097	0.498	20.807	vol0.55
60	2017/03/13 23:29:21	-15.715	-131.872	5394	0.092	0.477	21.349	vol0.55	-15.719	-131.786	5378.67	0.00964365	0.0818719	13.3167	0.0920905	0.483445	21.0446
61	2017/03/13 23:38:26	-15.71	-131.808	5726	0.084	0.454	22.114	vol0.60
62	2017/03/13 23:47:32	-15.71	-131.729	5871	0.096	0.455	22.127	vol0.60
63	2017/03/13 23:56:38	-15.705	-131.715	5873	0.082	0.464	22.86	vol0.60
64	2017/03/14 00:05:44	-15.714	-131.727	5872	0.093	0.405	21.572	vol0.60	-15.7097	-131.724	5872	0.00450925	0.00757188	1	0.0905336	0.442096	22.1926
65	2017/03/14 00:14:49	-15.692	-131.633	6322	0.088	0.441	23.316	vol0.65
66	2017/03/14 00:23:54	-15.707	-131.713	6345	0.094	0.43	22.655	vol0.65
67	2017/03/14 00:33:00	-15.722	-131.697	6351	0.076	0.456	23.635	vol0.65
68	2017/03/14 00:42:06	-15.728	-131.756	6221	0.085	0.477	22.896	vol0.65	-15.719	-131.722	6305.67	0.0108167	0.0305123	73.3848	0.0853171	0.45474	23.0658
69	2017/03/14 00:51:11	-15.723	-131.639	6721	0.088	0.388	23.629	vol0.70
70	2017/03/14 01:00:17	-15.727	-131.702	6712	0.084	0.44	24.822	vol0.70
71	2017/03/14 01:09:23	-15.715	-131.73	6588	0.079	0.443	23.296	vol0.70
72	2017/03/14 01:18:29	-15.733	-131.72	6725	0.089	0.398	24.134	vol0.70	-15.725	-131.717	6675	0.00916515	0.0141892	75.6241	0.0840991	0.427494	24.0921
73	2017/03/14 01:27:35	-15.706	-131.694	7012	0.08	0.396	23.919	vol0.75
74	2017/03/14 01:36:41	-15.719	-131.568	7084	0.087	0.432	24.837	vol0.75
75	2017/03/14 01:45:47	-15.749	-131.636	7091	0.076	0.389	24.416	vol0.75
76	2017/03/14 01:54:53	-15.723	-131.548	7222	0.077	0.415	25.613	vol0.75	-15.7303	-131.584	7132.33	0.0162891	0.0461303	77.7324	0.080154	0.412379	24.9603
77	2017/03/14 02:03:59	-15.707	-131.617	7433	0.088	0.397	25.795	vol0.80
78	2017/03/14 02:13:05	-15.737	-131.66	7537	0.083	0.403	24.854	vol0.80
79	2017/03/14 02:22:11	-15.71	-131.423	7579	0.09	0.401	26.861	vol0.80
80	2017/03/14 02:31:17	-15.74	-131.603	7539	0.081	0.37	26.171	vol0.80	-15.729	-131.562	7551.67	0.0165227	0.123705	23.6925	0.0847545	0.391625	25.9753
81	2017/03/14 02:40:24	-15.735	-131.648	7991	0.072	0.383	26.024	vol0.85
82	2017/03/14 02:49:30	-15.736	-131.618	7989	0.075	0.362	27.072	vol0.85
83	2017/03/14 02:58:36	-15.717	-131.492	7980	0.079	0.391	27.22	vol0.85
84	2017/03/14 03:07:43	-15.735	-131.481	7954	0.086	0.44	26.076	vol0.85	-15.7293	-131.53	7974.33	0.0106927	0.0761205	18.1751	0.0801291	0.398967	26.7941
85	2017/03/14 03:16:50	-15.734	-131.468	8363	0.077	0.398	27.48	vol0.90
86	2017/03/14 03:25:57	-15.741	-131.527	8308	0.076	0.377	27.891	vol0.90
87	2017/03/14 03:35:03	-15.725	-131.581	8218	0.079	0.435	27.987	vol0.90
88	2017/03/14 03:44:09	-15.74	-131.582	8192	0.086	0.335	28.104	vol0.90	-15.7353	-131.563	8239.33	0.00896289	0.0314696	60.8714	0.0804425	0.384525	27.9941
89	2017/03/14 03:53:16	-15.72	-131.507	8656	0.077	0.38	28.132	vol0.95
90	2017/03/14 04:02:22	-15.698	-131.415	8791	0.078	0.37	27.414	vol0.95
91	2017/03/14 04:11:28	-15.734	-131.555	8526	0.067	0.358	27.007	vol0.95
92	2017/03/14 04:20:35	-15.709	-131.557	8645	0.086	0.394	29.262	vol0.95	-15.7137	-131.509	8654	0.0184481	0.0814125	132.729	0.0773929	0.374299	27.9116
93	2017/03/14 09:56:49	-15.974	-131.813	9565	0.082	0.349	27.902	vol1.00
94	2017/03/14 10:05:56	-15.75	-131.46	8924	0.08	0.406	24.443	vol1.00
95	2017/03/14 10:15:03	-15.752	-131.51	9029	0.081	0.425	25.508	vol1.00
96	2017/03/14 10:24:10	-15.737	-131.485	8623	0.076	0.421	26.556	vol1.00	-15.7463	-131.485	8858.67	0.00814453	0.025	210.738	0.0790295	0.417413	25.5169
97	2017/03/14 10:33:16	-15.738	-131.534	9106	0.072	0.392	26.632	vol1.05
98	2017/03/14 10:42:23	-15.742	-131.386	9184	0.072	0.381	28.347	vol1.05
99	2017/03/14 10:51:30	-15.726	-131.434	8910	0.082	0.338	26.288	vol1.05
100	2017/03/14 11:00:37	-15.718	-131.51	8829	0.081	0.381	28.901	vol1.05	-15.7287	-131.443	8974.33	0.0122202	0.0625247	186.039	0.0784623	0.367227	27.868
101	2017/03/14 11:09:44	-15.727	-131.415	9130	0.079	0.44	27.823	vol1.10
102	2017/03/14 11:18:52	-15.732	-131.487	9290	0.073	0.386	28.173	vol1.10
103	2017/03/14 11:27:59	-15.74	-131.491	9625	0.07	0.375	28.899	vol1.10
104	2017/03/14 11:37:06	-15.725	-131.435	9272	0.079	0.342	28.524	vol1.10	-15.7323	-131.471	9395.67	0.00750555	0.031241	198.812	0.0740945	0.368142	28.5335
105	2017/03/14 11:46:15	-15.751	-131.484	9958	0.082	0.339	29.38	vol1.15
106	2017/03/14 11:55:22	-15.767	-131.43	10031	0.076	0.398	30.966	vol1.15
107	2017/03/14 12:04:29	-15.803	-131.576	9944	0.067	0.396	31.926	vol1.15
108	2017/03/14 12:13:37	-15.769	-131.457	10152	0.078	0.353	32.308	vol1.15	-15.7797	-131.488	10042.3	0.020232	0.077681	104.462	0.0738219	0.382896	31.7384
109	2017/03/14 12:22:44	-15.761	-131.47	10806	0.07	0.375	31.34	vol1.20
110	2017/03/14 12:31:51	-15.771	-131.466	11127	0.071	0.33	31.299	vol1.20
111	2017/03/14 12:40:59	-15.793	-131.52	11258	0.07	0.364	33.117	vol1.20
112	2017/03/14 12:50:07	-15.787	-131.492	11115	0.075	0.377	32.274	vol1.20	-15.7837	-131.493	11166.7	0.0113725	0.0270062	79.3242	0.0720324	0.35755	32.2386
113	2017/03/14 12:59:14	-15.768	-131.447	11975	0.077	0.428	32.676	vol1.25
114	2017/03/14 13:08:22	-15.8	-131.562	11656	0.082	0.366	34.737	vol1.25
115	2017/03/14 13:17:30	-15.781	-131.417	12038	0.067	0.376	35.865	vol1.25
116	2017/03/14 13:26:37	-15.772	-131.47	11702	0.074	0.347	32.633	vol1.25	-15.7843	-131.483	11798.7	0.0142945	0.0733689	208.541	0.0745855	0.363199	34.4377
117	2017/03/14 13:35:45	-15.805	-131.549	12451	0.077	0.404	34.322	vol1.30
118	2017/03/14 13:44:52	-15.784	-131.405	12342	0.071	0.385	35.087	vol1.30
119	2017/03/14 13:54:00	-15.822	-131.695	11903	0.067	0.391	34.421	vol1.30
120	2017/03/14 14:03:08	-15.761	-131.25	12460	0.072	0.424	33.375	vol1.30	-15.789	-131.45	12235	0.0308058	0.225887	293.511	0.0700333	0.400367	34.3016
121	2017/03/14 14:12:16	-15.793	-131.375	12780	0.068	0.405	36.967	vol1.35
122	2017/03/14 14:21:23	-15.795	-131.418	12760	0.079	0.389	36.252	vol1.35
123	2017/03/14 14:30:31	-15.802	-131.447	12618	0.072	0.392	35.401	vol1.35
124	2017/03/14 14:39:38	-15.808	-131.405	12907	0.068	0.361	35.513	vol1.35	-15.8017	-131.423	12761.7	0.00650641	0.0215019	144.507	0.0731414	0.380923	35.724
125	2017/03/14 14:48:46	-15.811	-131.388	13345	0.069	0.38	36.15	vol1.40
126	2017/03/14 14:57:54	-15.812	-131.469	13234	0.078	0.438	37.439	vol1.40
127	2017/03/14 15:07:02	-15.784	-131.244	13480	0.072	0.408	37.569	vol1.40
128	2017/03/14 15:16:10	-15.826	-131.534	13111	0.074	0.378	37.668	vol1.40	-15.8073	-131.416	13275	0.0213854	0.152179	187.886	0.0747083	0.408735	37.5588
129	2017/03/14 15:25:18	-15.816	-131.415	13907	0.077	0.363	40.517	vol1.45
130	2017/03/14 15:34:26	-15.838	-131.375	13757	0.076	0.389	39.562	vol1.45
131	2017/03/14 15:43:34	-15.861	-131.636	13714	0.072	0.424	37.997	vol1.45
132	2017/03/14 15:52:42	-15.807	-131.165	13867	0.072	0.38	37.267	vol1.45	-15.8353	-131.392	13779.3	0.0270986	0.23596	78.9071	0.0733576	0.398119	38.2873
133	2017/03/14 16:11:58	-15.843	-131.479	14314	0.078	0.399	41.661	vol1.50
134	2017/03/14 16:21:06	-15.827	-131.319	14285	0.072	0.394	38.794	vol1.50
135	2017/03/14 16:30:14	-15.825	-131.361	14284	0.073	0.384	37.186	vol1.50
136	2017/03/14 16:39:23	-15.831	-131.394	14346	0.073	0.429	39.852	vol1.50	-15.8277	-131.358	14305	0.00305505	0.0375899	35.5106	0.0726682	0.402796	38.6262
137	2017/03/14 16:48:31	-15.875	-131.506	14589	0.071	0.45	39.077	vol1.55
138	2017/03/14 16:57:40	-15.856	-131.491	14599	0.073	0.358	36.449	vol1.55
139	2017/03/14 17:06:48	-15.831	-131.285	14909	0.074	0.373	42.644	vol1.55
140	2017/03/14 17:15:57	-15.828	-131.301	14620	0.072	0.437	40.778	vol1.55	-15.8383	-131.359	14709.3	0.0153731	0.114595	173.235	0.0730046	0.390838	40.0412
141	2017/03/14 17:25:05	-15.854	-131.236	15305	0.069	0.337	39.578	vol1.60
142	2017/03/14 17:34:14	-15.838	-131.327	15224	0.07	0.405	40.635	vol1.60
143	2017/03/14 17:43:23	-15.871	-131.367	15112	0.072	0.392	41.946	vol1.60
144	2017/03/14 17:52:31	-15.86	-131.373	15152	0.084	0.434	41.066	vol1.60	-15.8563	-131.356	15162.7	0.0168028	0.0250067	56.7568	0.0755866	0.410709	41.2193
145	2017/03/14 18:01:40	-15.859	-131.316	15825	0.076	0.389	42.617	vol1.65
146	2017/03/14 18:10:49	-15.858	-131.338	15735	0.072	0.438	41.744	vol1.65
147	2017/03/14 18:19:58	-15.839	-131.253	15603	0.069	0.416	43.613	vol1.65
148	2017/03/14 18:29:07	-15.863	-131.315	15672	0.079	0.438	42.89	vol1.65	-15.8533	-131.302	15670	0.0126623	0.0439659	66.0227	0.0734529	0.430792	42.7559
149	2017/03/14 18:38:15	-15.859	-131.245	16097	0.081	0.429	44.254	vol1.70
150	2017/03/14 18:47:24	-15.848	-131.298	16244	0.07	0.366	41.276	vol1.70
151	2017/03/14 18:56:33	-15.869	-131.377	16199	0.071	0.4	43.67	vol1.70
152	2017/03/14 19:05:42	-15.853	-131.214	16146	0.074	0.444	43.064	vol1.70	-15.8567	-131.296	16196.3	0.0109697	0.0815128	49.0544	0.0716868	0.404595	42.6821
153	2017/03/14 19:14:51	-15.897	-131.393	16734	0.077	0.367	42.926	vol1.75
154	2017/03/14 19:24:00	-15.858	-131.175	16532	0.08	0.435	45.211	vol1.75
155	2017/03/14 19:33:10	-15.86	-131.237	16832	0.079	0.415	45.499	vol1.75
156	2017/03/14 19:42:19	-15.866	-131.249	16436	0.068	0.421	43.611	vol1.75	-15.8613	-131.22	16600	0.00416333	0.0397157	206.572	0.0758617	0.42375	44.7814
157	2017/03/14 19:51:28	-15.9	-131.285	16907	0.07	0.417	47.517	vol1.80
158	2017/03/14 20:00:37	-15.891	-131.263	17086	0.071	0.366	43.115	vol1.80
159	2017/03/14 20:09:46	-15.879	-131.316	17027	0.078	0.38	42.847	vol1.80
160	2017/03/14 20:18:55	-15.857	-131.237	16963	0.063	0.402	43.019	vol1.80	-15.8757	-131.272	17025.3	0.0172434	0.0402616	61.5169	0.0709319	0.382953	42.9938
161	2017/03/14 20:28:05	-15.889	-131.198	17772	0.083	0.387	44.118	vol1.85
162	2017/03/14 20:37:14	-15.905	-131.359	17437	0.072	0.429	46.318	vol1.85
163	2017/03/14 20:46:23	-15.891	-131.192	17763	0.076	0.378	49.618	vol1.85
164	2017/03/14 20:55:33	-15.892	-131.208	17475	0.07	0.432	48.219	vol1.85	-15.896	-131.253	17558.3	0.00781025	0.0921466	178.262	0.0727095	0.413743	48.0707
165	2017/03/14 21:04:42	-15.863	-131.131	17722	0.073	0.419	42.403	vol1.90
166	2017/03/14 21:13:52	-15.896	-131.339	17993	0.076	0.401	47.405	vol1.90
167	2017/03/14 21:23:02	-15.932	-131.201	18107	0.069	0.389	47.268	vol1.90
168	2017/03/14 21:32:11	-15.884	-131.176	18181	0.075	0.449	47.173	vol1.90	-15.904	-131.239	18093.7	0.02498	0.0877857	94.7066	0.0733985	0.413813	47.2821
169	2017/03/14 21:41:21	-15.889	-131.114	18443	0.067	0.423	47.145	vol1.95
170	2017/03/14 21:50:31	-15.911	-131.216	18075	0.073	0.449	48.419	vol1.95
171	2017/03/14 21:59:41	-15.917	-131.252	18506	0.08	0.427	47.113	vol1.95
172	2017/03/14 22:08:51	-15.919	-131.262	18621	0.07	0.415	50.206	vol1.95	-15.9157	-131.243	18400.7	0.00416333	0.0241937	287.837	0.0744513	0.430564	48.5959
173	2017/03/14 22:33:13	-15.901	-131.158	18957	0.076	0.424	47.729	vol2.00
174	2017/03/14 22:42:23	-15.898	-131.253	18501	0.069	0.449	47.275	vol2.00
175	2017/03/14 22:51:33	-15.907	-131.202	18972	0.074	0.408	46.42	vol2.00
176	2017/03/14 23:00:43	-15.939	-131.177	18969	0.072	0.376	47.929	vol2.00	-15.9147	-131.211	18814	0.0215484	0.0387341	271.07	0.0716961	0.412085	47.212
177	2017/03/14 23:09:53	-15.957	-131.238	19596	0.078	0.399	47.903	vol2.05
178	2017/03/14 23:19:04	-15.928	-131.199	19402	0.06	0.416	50.631	vol2.05
179	2017/03/14 23:28:14	-15.943	-131.183	19509	0.078	0.463	53.6	vol2.05
180	2017/03/14 23:37:24	-15.95	-131.236	19595	0.079	0.432	48.623	vol2.05	-15.9403	-131.206	19502	0.0112398	0.0271846	96.6902	0.0728583	0.437435	50.9923
181	2017/03/14 23:46:34	-15.936	-131.046	19959	0.074	0.468	51.084	vol2.10
182	2017/03/14 23:55:44	-15.928	-131.168	19851	0.073	0.42	51.232	vol2.10
183	2017/03/15 00:04:55	-15.906	-131.083	19869	0.069	0.45	52.498	vol2.10
184	2017/03/15 00:14:05	-15.93	-131.168	20015	0.078	0.455	52.753	vol2.10	-15.9213	-131.14	19911.7	0.0133167	0.0490748	89.9407	0.0734257	0.441937	52.1652
185	2017/03/15 00:23:16	-15.938	-131.151	20317	0.072	0.454	53.1	vol2.15
186	2017/03/15 00:32:27	-15.949	-131.216	20344	0.08	0.468	53.587	vol2.15
187	2017/03/15 00:41:37	-15.936	-131.104	20527	0.07	0.438	51.265	vol2.15
188	2017/03/15 00:50:47	-15.949	-131.184	20473	0.083	0.449	49.312	vol2.15	-15.9447	-131.168	20448	0.00750555	0.0576888	94.0266	0.0778653	0.451837	51.4177
189	2017/03/15 00:59:58	-15.962	-131.099	20848	0.075	0.418	54.282	vol2.20
190	2017/03/15 01:09:08	-15.968	-131.153	20731	0.073	0.417	54.867	vol2.20
191	2017/03/15 01:18:19	-15.966	-131.173	20498	0.072	0.479	51.984	vol2.20
192	2017/03/15 01:27:29	-15.97	-131.119	20975	0.069	0.404	55.633	vol2.20	-15.968	-131.148	20734.7	0.002	0.0273008	238.521	0.0713536	0.434567	54.1841
193	2017/03/15 01:36:39	-15.963	-131.081	20828	0.073	0.476	53.885	vol2.25
194	2017/03/15 01:45:50	-15.961	-131.108	21418	0.069	0.402	53.915	vol2.25
195	2017/03/15 01:55:00	-15.981	-131.096	21313	0.075	0.38	55.755	vol2.25
196	2017/03/15 02:04:11	-15.968	-131.006	21428	0.073	0.427	57.481	vol2.25	-15.97	-131.07	21386.3	0.0101489	0.0557494	63.705	0.0723763	0.403457	55.736
197	2017/03/15 02:13:22	-15.973	-131.101	21675	0.075	0.445	52.626	vol2.30
198	2017/03/15 02:22:33	-15.995	-131.196	21796	0.077	0.458	54.122	vol2.30
199	2017/03/15 02:31:43	-15.958	-130.907	21662	0.077	0.423	58.303	vol2.30
200	2017/03/15 02:40:54	-15.967	-130.962	21927	0.076	0.441	58.093	vol2.30	-15.9733	-131.022	21795	0.0192959	0.153461	132.503	0.0766681	0.440898	56.8719
201	2017/03/15 02:50:05	-15.996	-131.004	22576	0.079	0.448	53.885	vol2.40
202	2017/03/15 02:59:16	-15.985	-131.041	22716	0.071	0.42	55.276	vol2.40
203	2017/03/15 03:08:26	-15.996	-130.949	22666	0.076	0.447	60.582	vol2.40
204	2017/03/15 03:17:37	-15.976	-131.06	21948	0.073	0.435	56.681	vol2.40	-15.9857	-131.017	22443.3	0.0100167	0.0593661	429.699	0.0733621	0.434141	57.5568
205	2017/03/15 03:26:48	-16.013	-130.938	23622	0.078	0.472	59.519	vol2.50
206	2017/03/15 03:36:00	-16.007	-131.037	23668	0.071	0.523	56.069	vol2.50
207	2017/03/15 03:45:11	-16.008	-131.017	22976	0.077	0.5	61.307	vol2.50
208	2017/03/15 03:54:22	-16	-131.022	23520	0.076	0.468	61.138	vol2.50	-16.005	-131.025	23388	0.0043589	0.0104083	364.395	0.0747128	0.497511	59.5543
209	2017/03/15 04:03:32	-15.938	-131.198	18958	0.079	0.422	53.084	vol2.00
210	2017/03/15 04:12:41	-15.894	-131.059	18883	0.073	0.4	52.823	vol2.00
211	2017/03/15 04:21:51	-15.921	-131.161	19027	0.077	0.456	52.863	vol2.00
212	2017/03/15 04:31:01	-15.908	-131.078	18873	0.065	0.403	52.648	vol2.00	-15.9077	-131.099	18927.7	0.0135031	0.0542433	86.1704	0.0718401	0.420454	52.7781

## Sheet: exp1_DI_raw
Line	Time Code	d(18_16)Mean	d(D_H)Mean	H2O_Mean	d(18_16)_SD	d(D_H)_SD	H2O_SD	Method	d(18_16)_avg	d(D_H)_avg	H2O_avg	d(18_16)_SDM	d(D_H)_SDM	H2O_SDM	d(18_16)_SD_rms	d(D_H)_SD_rms	H2O_SD_rms
1	2017/03/15 08:01:26	-8.432	-52.428	18698	0.074	0.394	39.715	vol2.00
2	2017/03/15 08:10:36	-8.267	-49.193	18746	0.071	0.445	39.904	vol2.00
3	2017/03/15 08:19:46	-8.258	-48.487	18981	0.084	0.439	42.5	vol2.00
4	2017/03/15 08:28:55	-8.223	-48.166	18670	0.067	0.446	46.251	vol2.00	-8.24933	-48.6153	18799	0.0232451	0.52539	162.133	0.074355	0.443344	42.9641
5	2017/03/15 08:38:05	-8.205	-47.99	18449	0.071	0.45	45.553	vol2.00
6	2017/03/15 08:47:15	-8.213	-47.818	18934	0.083	0.372	42.34	vol2.00
7	2017/03/15 08:56:25	-8.21	-47.671	18701	0.074	0.428	48.025	vol2.00
8	2017/03/15 09:05:34	-8.19	-47.547	18857	0.077	0.403	46.872	vol2.00	-8.20433	-47.6787	18830.7	0.0125033	0.135663	118.711	0.0780897	0.401654	45.8114
9	2017/03/15 09:14:44	-8.196	-47.333	18661	0.07	0.425	49.452	vol2.00
10	2017/03/15 09:23:54	-8.194	-47.507	18334	0.067	0.398	47.935	vol2.00
11	2017/03/15 09:33:04	-8.158	-47.2	18755	0.073	0.385	50.427	vol2.00
12	2017/03/15 09:42:14	-8.16	-47.35	18228	0.076	0.391	47.216	vol2.00	-8.17067	-47.3523	18439	0.020232	0.153513	278.749	0.0720972	0.391369	48.5455
13	2017/03/15 09:51:25	-8.176	-47.283	18269	0.081	0.422	48.951	vol2.00
14	2017/03/15 10:00:34	-8.181	-47.109	18667	0.079	0.414	46.281	vol2.00
15	2017/03/15 10:09:44	-8.17	-47.292	18257	0.078	0.422	45.723	vol2.00
16	2017/03/15 10:18:53	-8.159	-47.127	18191	0.077	0.45	46.408	vol2.00	-8.17	-47.176	18371.7	0.011	0.100861	257.886	0.0780043	0.428944	46.1383
17	2017/03/15 10:27:58	-11.357	-57.858	417	0.729	4.113	17.088	vol0.05
18	2017/03/15 10:37:03	-10.178	-56.074	499	0.578	3.665	14.607	vol0.05
19	2017/03/15 10:46:07	-10.136	-56.894	475	0.626	4.006	12.338	vol0.05
20	2017/03/15 10:55:11	-10.117	-56.927	453	0.566	4.326	11.176	vol0.05	-10.1437	-56.6317	475.667	0.0312143	0.483235	23.0072	0.590569	4.0081	12.7866
21	2017/03/15 11:04:16	-8.944	-53.287	929	0.327	2.128	12.674	vol0.10
22	2017/03/15 11:13:20	-8.896	-53.093	938	0.325	1.965	12.404	vol0.10
23	2017/03/15 11:22:26	-8.916	-53.067	917	0.315	2.191	11.989	vol0.10
24	2017/03/15 11:31:30	-8.876	-53.06	941	0.331	1.914	11.712	vol0.10	-8.896	-53.0733	932	0.02	0.0173877	13.0767	0.323734	2.02691	12.0384
25	2017/03/15 11:40:34	-8.562	-51.824	1358	0.246	1.495	12.665	vol0.15
26	2017/03/15 11:49:38	-8.553	-51.411	1333	0.236	1.521	12.221	vol0.15
27	2017/03/15 11:58:43	-8.514	-51.473	1329	0.209	1.449	12.044	vol0.15
28	2017/03/15 12:07:48	-8.527	-51.681	1352	0.239	1.434	11.758	vol0.15	-8.53133	-51.5217	1338	0.0198578	0.141426	12.2882	0.228399	1.46849	12.0092
29	2017/03/15 12:16:52	-8.364	-50.963	1762	0.193	1.152	12.921	vol0.20
30	2017/03/15 12:25:57	-8.339	-50.602	1802	0.181	1.086	13.347	vol0.20
31	2017/03/15 12:35:02	-8.344	-50.478	1843	0.173	1.153	13.254	vol0.20
32	2017/03/15 12:44:07	-8.3	-50.919	1765	0.181	1.176	12.455	vol0.20	-8.32767	-50.6663	1803.33	0.0240901	0.22743	39.0171	0.178373	1.13897	13.0248
33	2017/03/15 12:53:11	-8.205	-50.182	2235	0.167	0.855	13.819	vol0.25
34	2017/03/15 13:02:16	-8.219	-50.05	2189	0.162	1.003	13.864	vol0.25
35	2017/03/15 13:11:20	-8.243	-50.21	2143	0.155	0.995	13.803	vol0.25
36	2017/03/15 13:20:25	-8.203	-50.041	2227	0.156	0.838	13.646	vol0.25	-8.22167	-50.1003	2186.33	0.0201329	0.0950807	42.0634	0.157697	0.948381	13.7713
37	2017/03/15 13:29:29	-8.123	-49.791	2744	0.127	0.691	14.477	vol0.30
38	2017/03/15 13:38:34	-8.1	-49.709	2760	0.127	0.749	14.519	vol0.30
39	2017/03/15 13:47:40	-8.14	-49.606	2707	0.126	0.681	15.219	vol0.30
40	2017/03/15 13:56:45	-8.107	-49.712	2763	0.135	0.79	14.877	vol0.30	-8.11567	-49.6757	2743.33	0.021362	0.0603517	31.5013	0.129396	0.741364	14.8744
41	2017/03/15 14:05:49	-8.078	-49.389	3257	0.107	0.791	15.469	vol0.35
42	2017/03/15 14:14:54	-8.078	-49.38	3203	0.127	0.673	15.598	vol0.35
43	2017/03/15 14:23:59	-8.081	-49.319	3267	0.118	0.698	16.221	vol0.35
44	2017/03/15 14:33:04	-8.056	-49.242	3283	0.122	0.727	16.484	vol0.35	-8.07167	-49.3137	3251	0.0136504	0.0691544	42.332	0.122389	0.699681	16.1053
45	2017/03/15 14:42:09	-8.04	-49.235	3710	0.117	0.544	17.006	vol0.40
46	2017/03/15 14:51:14	-8.067	-49.237	3629	0.112	0.613	17.188	vol0.40
47	2017/03/15 15:00:19	-8.051	-49.169	3702	0.111	0.614	17.025	vol0.40
48	2017/03/15 15:09:23	-8.066	-49.07	3624	0.115	0.654	16.684	vol0.40	-8.06133	-49.1587	3651.67	0.00896289	0.0839782	43.6616	0.112679	0.627291	16.967
49	2017/03/15 15:18:29	-8.056	-49.141	4018	0.102	0.554	17.795	vol0.45
50	2017/03/15 15:27:35	-8	-48.856	4182	0.103	0.599	18.22	vol0.45
51	2017/03/15 15:36:40	-8.002	-48.756	4238	0.103	0.542	18.273	vol0.45
52	2017/03/15 15:45:45	-8.002	-48.846	4269	0.103	0.496	18.312	vol0.45	-8.00133	-48.8193	4229.67	0.0011547	0.0550757	44.0946	0.103	0.547291	18.2684
53	2017/03/15 16:14:24	-8.061	-49.3	4547	0.095	0.562	18.897	vol0.50
54	2017/03/15 16:23:29	-7.994	-48.707	4814	0.097	0.522	18.778	vol0.50
55	2017/03/15 16:32:35	-7.975	-48.479	4887	0.089	0.529	18.749	vol0.50
56	2017/03/15 16:41:40	-7.981	-48.54	4873	0.097	0.477	19.91	vol0.50	-7.98333	-48.5753	4858	0.00971253	0.118035	38.7427	0.0944087	0.509854	19.1533
57	2017/03/15 16:50:46	-7.953	-48.405	5313	0.095	0.486	20.523	vol0.55
58	2017/03/15 16:59:51	-7.979	-48.475	5170	0.093	0.498	20.543	vol0.55
59	2017/03/15 17:08:57	-7.971	-48.508	5260	0.098	0.468	19.667	vol0.55
60	2017/03/15 17:18:02	-7.971	-48.423	5268	0.094	0.371	20.792	vol0.55	-7.97367	-48.4687	5232.67	0.0046188	0.0428525	54.4181	0.0950246	0.44895	20.3397
61	2017/03/15 17:27:08	-7.963	-48.37	5598	0.093	0.467	20.288	vol0.60
62	2017/03/15 17:36:13	-7.956	-48.342	5578	0.096	0.447	20.271	vol0.60
63	2017/03/15 17:45:19	-7.985	-48.367	5737	0.089	0.46	21.084	vol0.60
64	2017/03/15 17:54:25	-7.974	-48.37	5577	0.085	0.494	20.557	vol0.60	-7.97167	-48.3597	5630.67	0.0146401	0.0153731	92.0887	0.0901147	0.46742	20.6401
65	2017/03/15 18:03:30	-7.963	-48.287	6118	0.085	0.437	21.963	vol0.65
66	2017/03/15 18:12:36	-7.956	-48.21	5990	0.078	0.448	21.469	vol0.65
67	2017/03/15 18:21:42	-7.96	-48.255	5962	0.077	0.386	22.214	vol0.65
68	2017/03/15 18:30:48	-7.947	-48.239	5949	0.094	0.394	22.073	vol0.65	-7.95433	-48.2347	5967	0.00665833	0.0228108	20.9523	0.0833647	0.410258	21.921
69	2017/03/15 18:39:54	-7.958	-48.253	6300	0.085	0.406	21.819	vol0.70
70	2017/03/15 18:49:00	-7.957	-48.114	6450	0.082	0.459	24.124	vol0.70
71	2017/03/15 18:58:06	-7.96	-48.198	6421	0.091	0.371	22.873	vol0.70
72	2017/03/15 19:07:11	-7.954	-48.145	6406	0.085	0.415	23.023	vol0.70	-7.957	-48.1523	6425.67	0.003	0.0424774	22.3681	0.0860814	0.416552	23.3467
73	2017/03/15 19:16:17	-7.956	-48.12	6724	0.086	0.413	23.302	vol0.75
74	2017/03/15 19:25:23	-7.941	-48.008	6737	0.091	0.409	22.855	vol0.75
75	2017/03/15 19:34:29	-7.961	-48.117	6738	0.089	0.477	24.268	vol0.75
76	2017/03/15 19:43:35	-7.964	-48.098	6733	0.082	0.445	24.913	vol0.75	-7.95533	-48.0743	6736	0.0125033	0.0582266	2.64575	0.0874185	0.444535	24.0274
77	2017/03/15 19:52:41	-7.938	-48.035	6753	0.084	0.421	24.049	vol0.80
78	2017/03/15 20:01:47	-7.953	-48.069	6831	0.088	0.41	22.998	vol0.80
79	2017/03/15 20:10:53	-7.945	-48.102	6841	0.075	0.452	24.312	vol0.80
80	2017/03/15 20:20:00	-7.944	-47.983	6683	0.085	0.406	23.198	vol0.80	-7.94733	-48.0513	6785	0.00493288	0.0614356	88.476	0.0828533	0.423178	23.5098
81	2017/03/15 20:29:06	-7.965	-48.002	7185	0.088	0.415	24.747	vol0.85
82	2017/03/15 20:38:12	-7.99	-48.121	7037	0.094	0.39	24.558	vol0.85
83	2017/03/15 20:47:18	-7.945	-47.935	7266	0.084	0.479	24.539	vol0.85
84	2017/03/15 20:56:25	-7.936	-47.963	6943	0.073	0.408	23.919	vol0.85	-7.957	-48.0063	7082	0.028931	0.100286	166.135	0.0841051	0.427397	24.3405
85	2017/03/15 21:05:32	-7.949	-47.968	7378	0.076	0.382	24.69	vol0.90
86	2017/03/15 21:14:38	-7.945	-47.843	7397	0.083	0.455	24.664	vol0.90
87	2017/03/15 21:23:45	-7.941	-47.814	7646	0.071	0.448	25.531	vol0.90
88	2017/03/15 21:32:51	-7.937	-47.802	7562	0.079	0.46	25.371	vol0.90	-7.941	-47.8197	7535	0.004	0.0210792	126.677	0.0778267	0.45436	25.1915
89	2017/03/15 21:41:58	-7.958	-47.878	7776	0.082	0.411	25.075	vol0.95
90	2017/03/15 21:51:05	-7.948	-47.935	7751	0.084	0.405	24.815	vol0.95
91	2017/03/15 22:00:12	-7.94	-47.834	7850	0.08	0.425	25.172	vol0.95
92	2017/03/15 22:09:19	-7.921	-47.796	7580	0.085	0.385	26.578	vol0.95	-7.93633	-47.855	7727	0.0138684	0.0718401	136.591	0.0830281	0.405329	25.533
93	2017/03/15 22:24:56	-7.94	-47.82	8058	0.076	0.422	28.129	vol1.00
94	2017/03/15 22:34:03	-7.96	-47.651	9571	0.069	0.422	27.56	vol1.00
95	2017/03/15 22:43:10	-7.952	-47.508	9382	0.069	0.4	29.943	vol1.00
96	2017/03/15 22:52:17	-7.971	-47.747	9511	0.076	0.372	29.355	vol1.00	-7.961	-47.6353	9488	0.00953939	0.120268	96.5764	0.0714096	0.398526	28.9704
97	2017/03/15 23:01:24	-7.969	-47.656	9685	0.081	0.405	28.39	vol1.05
98	2017/03/15 23:10:31	-7.973	-47.698	9663	0.073	0.365	29.481	vol1.05
99	2017/03/15 23:19:38	-7.971	-47.603	9548	0.066	0.392	29.473	vol1.05
100	2017/03/15 23:28:46	-7.965	-47.609	9532	0.072	0.38	29.019	vol1.05	-7.96967	-47.6367	9581	0.00416333	0.0532009	71.4633	0.0704012	0.379161	29.3251
101	2017/03/15 23:37:55	-7.994	-47.7	9862	0.08	0.43	29	vol1.10
102	2017/03/15 23:47:02	-7.982	-47.602	9793	0.08	0.397	30.685	vol1.10
103	2017/03/15 23:56:10	-7.972	-47.619	9604	0.08	0.407	30.276	vol1.10
104	2017/03/16 00:05:18	-7.988	-47.658	9539	0.07	0.361	29.63	vol1.10	-7.98067	-47.6263	9645.33	0.0080829	0.0287112	131.948	0.0768115	0.388835	30.2001
105	2017/03/16 00:14:25	-7.968	-47.587	9905	0.074	0.393	30.592	vol1.15
106	2017/03/16 00:23:33	-7.988	-47.607	9936	0.075	0.343	31.652	vol1.15
107	2017/03/16 00:32:40	-7.985	-47.653	10036	0.077	0.394	30.2	vol1.15
108	2017/03/16 00:41:48	-7.978	-47.546	10000	0.079	0.379	31.212	vol1.15	-7.98367	-47.602	9990.67	0.0051316	0.0536749	50.6491	0.0770173	0.372615	31.0273
109	2017/03/16 00:50:56	-8.013	-47.626	10192	0.077	0.364	30.447	vol1.20
110	2017/03/16 01:00:03	-7.988	-47.567	10178	0.081	0.369	31.433	vol1.20
111	2017/03/16 01:09:11	-8.007	-47.715	10263	0.071	0.386	32.004	vol1.20
112	2017/03/16 01:18:19	-8.027	-47.567	10457	0.072	0.346	31.326	vol1.20	-8.00733	-47.6163	10299.3	0.0195021	0.0854478	143.005	0.074802	0.367366	31.5891
113	2017/03/16 01:27:26	-8.01	-47.512	10935	0.076	0.376	33.632	vol1.25
114	2017/03/16 01:36:34	-7.997	-47.502	10942	0.068	0.363	31.299	vol1.25
115	2017/03/16 01:45:41	-8.029	-47.532	11186	0.07	0.44	32.805	vol1.25
116	2017/03/16 01:54:50	-8.027	-47.444	11178	0.074	0.397	33.495	vol1.25	-8.01767	-47.4927	11102	0.0179258	0.0447363	138.622	0.0707107	0.401239	32.5459
117	2017/03/16 02:03:57	-8.024	-47.472	11811	0.07	0.381	33.523	vol1.30
118	2017/03/16 02:13:05	-8.016	-47.343	11860	0.073	0.344	33.731	vol1.30
119	2017/03/16 02:22:14	-8.029	-47.471	11680	0.074	0.385	35.125	vol1.30
120	2017/03/16 02:31:22	-7.997	-47.259	12010	0.076	0.399	34.505	vol1.30	-8.014	-47.3577	11850	0.0160935	0.106758	165.227	0.0743438	0.376724	34.4584
121	2017/03/16 02:40:29	-8.014	-47.295	12287	0.077	0.409	36.502	vol1.35
122	2017/03/16 02:49:37	-8.024	-47.333	12570	0.077	0.342	36.67	vol1.35
123	2017/03/16 02:58:46	-8.031	-47.342	12519	0.074	0.391	36.505	vol1.35
124	2017/03/16 03:07:54	-8.035	-47.345	12504	0.078	0.423	31.968	vol1.35	-8.03	-47.34	12531	0.00556776	0.006245	34.5977	0.0763523	0.38677	35.1153
125	2017/03/16 03:17:02	-8.032	-47.261	13092	0.075	0.398	35.383	vol1.40
126	2017/03/16 03:26:10	-8.032	-47.304	13042	0.077	0.366	38.109	vol1.40
127	2017/03/16 03:35:18	-8.02	-47.252	13118	0.08	0.401	34.792	vol1.40
128	2017/03/16 03:44:26	-8.038	-47.219	13128	0.071	0.431	37.596	vol1.40	-8.03	-47.2583	13096	0.00916515	0.0428525	47.0319	0.076092	0.400216	36.8612
129	2017/03/16 03:53:35	-8.038	-47.292	13380	0.082	0.36	37.358	vol1.45
130	2017/03/16 04:02:43	-8.05	-47.242	13556	0.077	0.39	37.742	vol1.45
131	2017/03/16 04:11:51	-8.055	-47.224	13515	0.074	0.41	36.517	vol1.45
132	2017/03/16 04:21:00	-8.048	-47.242	13481	0.077	0.369	36.982	vol1.45	-8.051	-47.236	13517.3	0.00360555	0.0103923	37.5544	0.0760132	0.390026	37.0838
133	2017/03/16 04:30:08	-8.027	-47.117	14026	0.069	0.359	39.031	vol1.50
134	2017/03/16 04:39:16	-8.046	-47.183	14114	0.069	0.373	38.085	vol1.50
135	2017/03/16 04:48:25	-8.045	-47.157	13864	0.071	0.403	37.475	vol1.50
136	2017/03/16 04:57:33	-8.038	-47.237	13977	0.076	0.407	39.077	vol1.50	-8.043	-47.1923	13985	0.0043589	0.0408085	125.192	0.0720602	0.394625	38.218
137	2017/03/16 05:06:41	-8.042	-47.102	14350	0.075	0.432	39.957	vol1.55
138	2017/03/16 05:15:50	-8.056	-47.127	14381	0.07	0.401	38.667	vol1.55
139	2017/03/16 05:24:58	-8.067	-47.154	14260	0.073	0.365	39.537	vol1.55
140	2017/03/16 05:34:07	-8.067	-47.119	14223	0.073	0.397	37.514	vol1.55	-8.06333	-47.1333	14288	0.00635085	0.0183394	82.6378	0.0720139	0.388001	38.5816
141	2017/03/16 08:02:28	-8.205	-47.985	14931	0.07	0.351	33.983	vol1.60
142	2017/03/16 08:11:37	-8.059	-47.284	14549	0.077	0.4	32.627	vol1.60
143	2017/03/16 08:20:46	-8.077	-47.205	14772	0.074	0.416	36.255	vol1.60
144	2017/03/16 08:29:55	-8.079	-47.244	14524	0.076	0.392	36.746	vol1.60	-8.07167	-47.2443	14615	0.0110151	0.0395011	136.539	0.0756769	0.40279	35.2572
145	2017/03/16 08:39:04	-8.088	-47.091	15005	0.08	0.391	38.001	vol1.65
146	2017/03/16 08:48:13	-8.073	-47.034	15182	0.074	0.4	38.265	vol1.65
147	2017/03/16 08:57:22	-8.096	-47.215	15067	0.08	0.407	39.85	vol1.65
148	2017/03/16 09:06:30	-8.103	-47.09	15165	0.073	0.395	39.735	vol1.65	-8.09067	-47.113	15138	0.015695	0.0926661	62.0725	0.0757298	0.400697	39.29
149	2017/03/16 09:15:39	-8.116	-47.093	15734	0.077	0.376	41.233	vol1.70
150	2017/03/16 09:24:48	-8.083	-47.04	15524	0.072	0.379	41.683	vol1.70
151	2017/03/16 09:33:57	-8.1	-47.106	15680	0.067	0.367	41.36	vol1.70
152	2017/03/16 09:43:06	-8.107	-47.035	15688	0.079	0.414	41.567	vol1.70	-8.09667	-47.0603	15630.7	0.0123423	0.0396274	92.4626	0.0728331	0.38718	41.5369
153	2017/03/16 09:52:15	-8.111	-46.983	16146	0.07	0.337	41.147	vol1.75
154	2017/03/16 10:01:25	-8.112	-46.983	16249	0.079	0.378	43.944	vol1.75
155	2017/03/16 10:10:34	-8.074	-46.893	16193	0.074	0.363	43.424	vol1.75
156	2017/03/16 10:19:43	-8.102	-46.91	16024	0.076	0.411	42.193	vol1.75	-8.096	-46.9287	16155.3	0.0196977	0.0478156	117.134	0.076361	0.384523	43.1932
157	2017/03/16 10:28:53	-8.112	-46.988	16690	0.078	0.398	45.483	vol1.80
158	2017/03/16 10:38:02	-8.102	-46.861	16670	0.071	0.405	43.988	vol1.80
159	2017/03/16 10:47:11	-8.13	-46.905	16870	0.084	0.407	44.98	vol1.80
160	2017/03/16 10:56:21	-8.117	-46.944	16918	0.086	0.398	47.191	vol1.80	-8.11633	-46.9033	16819.3	0.0140119	0.0415251	131.535	0.0806081	0.403352	45.4061
161	2017/03/16 11:05:30	-8.117	-46.744	17477	0.077	0.432	42.365	vol1.85
162	2017/03/16 11:14:40	-8.145	-46.861	17464	0.075	0.397	44.993	vol1.85
163	2017/03/16 11:23:49	-8.119	-46.855	17399	0.085	0.428	44.825	vol1.85
164	2017/03/16 11:32:59	-8.137	-46.78	17638	0.077	0.421	46.236	vol1.85	-8.13367	-46.832	17500.3	0.0133167	0.0451331	123.573	0.0791181	0.415545	45.3557
165	2017/03/16 11:42:09	-8.127	-46.9	17789	0.076	0.451	47.593	vol1.90
166	2017/03/16 11:51:19	-8.131	-46.981	17769	0.081	0.401	45.639	vol1.90
167	2017/03/16 12:00:28	-8.125	-46.725	17930	0.076	0.436	49.27	vol1.90
168	2017/03/16 12:09:38	-8.139	-46.781	17858	0.073	0.39	49.313	vol1.90	-8.13167	-46.829	17852.3	0.00702377	0.134581	80.6494	0.0767376	0.40947	48.1048
169	2017/03/16 12:18:48	-8.143	-46.663	18449	0.076	0.422	46.087	vol1.95
170	2017/03/16 12:27:58	-8.138	-46.847	18411	0.066	0.436	47.374	vol1.95
171	2017/03/16 12:37:08	-8.127	-46.746	18509	0.08	0.415	47.809	vol1.95
172	2017/03/16 12:46:19	-8.139	-46.649	18478	0.075	0.438	45.464	vol1.95	-8.13467	-46.7473	18466	0.00665833	0.0990067	50.0899	0.0738941	0.429793	46.8934
173	2017/03/16 12:55:29	-8.153	-46.722	18991	0.073	0.42	52.165	vol2.00
174	2017/03/16 13:04:39	-8.112	-46.608	18870	0.073	0.366	48.889	vol2.00
175	2017/03/16 13:13:49	-8.142	-46.739	19012	0.069	0.416	46.717	vol2.00
176	2017/03/16 13:22:59	-8.161	-46.764	19016	0.076	0.435	47.977	vol2.00	-8.13833	-46.7037	18966	0.0247049	0.0837874	83.1625	0.0727232	0.406709	47.8693
177	2017/03/16 13:32:09	-8.153	-46.58	19444	0.075	0.456	48.012	vol2.05
178	2017/03/16 13:41:19	-8.144	-46.577	19306	0.071	0.407	49.859	vol2.05
179	2017/03/16 13:50:30	-8.148	-46.607	19471	0.075	0.457	48.103	vol2.05
180	2017/03/16 13:59:40	-8.159	-46.555	19407	0.076	0.434	51.317	vol2.05	-8.15033	-46.5797	19394.7	0.00776745	0.0261024	83.1885	0.0740315	0.433149	49.777
181	2017/03/16 14:19:09	-8.155	-46.66	19926	0.08	0.445	50.76	vol2.10
182	2017/03/16 14:28:19	-8.148	-46.462	19970	0.077	0.445	50.502	vol2.10
183	2017/03/16 14:37:29	-8.145	-46.561	19877	0.078	0.388	47.49	vol2.10
184	2017/03/16 14:46:40	-8.164	-46.52	19859	0.071	0.415	50.803	vol2.10	-8.15233	-46.5143	19902	0.0102144	0.0497427	59.5735	0.0753967	0.416651	49.6209
185	2017/03/16 14:55:50	-8.149	-46.553	20254	0.069	0.438	50.7	vol2.15
186	2017/03/16 15:05:00	-8.172	-46.565	20020	0.075	0.431	50.686	vol2.15
187	2017/03/16 15:14:11	-8.162	-46.584	20304	0.08	0.401	53.943	vol2.15
188	2017/03/16 15:23:21	-8.192	-46.55	20098	0.076	0.452	52.263	vol2.15	-8.17533	-46.5663	20140.7	0.0152753	0.0170392	146.729	0.0770303	0.428511	52.3142
189	2017/03/16 15:32:32	-8.193	-46.61	20655	0.083	0.432	53.605	vol2.20
190	2017/03/16 15:41:42	-8.198	-46.506	20787	0.077	0.424	56.081	vol2.20
191	2017/03/16 15:50:53	-8.194	-46.459	20587	0.079	0.461	52.929	vol2.20
192	2017/03/16 16:00:04	-8.181	-46.477	20222	0.08	0.417	56.461	vol2.20	-8.191	-46.4807	20532	0.00888819	0.0237136	286.487	0.0786766	0.434429	55.1797
193	2017/03/16 16:09:14	-8.215	-46.525	20912	0.071	0.46	55.028	vol2.25
194	2017/03/16 16:18:25	-8.229	-46.533	20994	0.081	0.468	55.367	vol2.25
195	2017/03/16 16:27:36	-8.196	-46.495	21146	0.077	0.48	57.217	vol2.25
196	2017/03/16 16:36:46	-8.23	-46.722	20883	0.073	0.452	53.802	vol2.25	-8.21833	-46.5833	21007.7	0.0193477	0.121583	132.032	0.0770692	0.466808	55.4796
197	2017/03/16 16:45:57	-8.227	-46.404	21207	0.074	0.452	54.633	vol2.30
198	2017/03/16 16:55:08	-8.235	-46.497	21210	0.069	0.457	56.641	vol2.30
199	2017/03/16 17:04:18	-8.237	-46.495	21532	0.075	0.46	55.532	vol2.30
200	2017/03/16 17:13:29	-8.237	-46.57	21411	0.074	0.413	53.332	vol2.30	-8.23633	-46.5207	21384.3	0.0011547	0.0427356	162.648	0.0727141	0.443854	55.1855
201	2017/03/16 17:22:41	-8.231	-46.431	22167	0.078	0.45	57.058	vol2.40
202	2017/03/16 17:31:52	-8.247	-46.453	22472	0.076	0.437	58.78	vol2.40
203	2017/03/16 17:41:03	-8.25	-46.413	22569	0.086	0.483	54.955	vol2.40
204	2017/03/16 17:50:14	-8.253	-46.548	22299	0.077	0.485	58.11	vol2.40	-8.25	-46.4713	22446.7	0.003	0.0693421	136.771	0.0797935	0.468858	57.3059
205	2017/03/16 17:59:25	-8.267	-46.391	23086	0.082	0.462	62.199	vol2.50
206	2017/03/16 18:08:36	-8.261	-46.387	23193	0.078	0.464	60.269	vol2.50
207	2017/03/16 18:17:48	-8.273	-46.31	23417	0.082	0.485	55.256	vol2.50
208	2017/03/16 18:26:59	-8.243	-46.439	23329	0.083	0.399	61.337	vol2.50	-8.259	-46.3787	23313	0.0150997	0.0649025	112.854	0.0810288	0.450822	59.0136
209	2017/03/16 18:36:09	-8.179	-46.842	18778	0.075	0.413	53.17	vol2.00
210	2017/03/16 18:45:18	-8.131	-46.676	18432	0.062	0.422	54.006	vol2.00
211	2017/03/16 18:54:28	-8.171	-46.853	18610	0.07	0.473	52.904	vol2.00
212	2017/03/16 19:03:38	-8.116	-46.643	18540	0.073	0.419	50.491	vol2.00	-8.13933	-46.724	18527.3	0.0284312	0.112929	89.6735	0.0684909	0.4387	52.4875

## Sheet: exp1_EVAP_raw
Line	Time Code	d(18_16)Mean	d(D_H)Mean	H2O_Mean	d(18_16)_SD	d(D_H)_SD	H2O_SD	Method	d(18_16)_avg	d(D_H)_avg	H2O_avg	d(18_16)_SDM	d(D_H)_SDM	H2O_SDM	d(18_16)_SD_rms	d(D_H)_SD_rms	H2O_SD_rms
13	2017/03/09 22:40:02	3.184	12.37	18240	0.079	0.404	49.787	vol2.00
14	2017/03/09 22:49:11	3.182	12.325	18067	0.078	0.457	51.061	vol2.00
15	2017/03/09 22:58:21	3.192	12.283	17672	0.08	0.475	47.605	vol2.00
16	2017/03/09 23:07:30	3.189	12.451	17986	0.087	0.433	46.385	vol2.00	3.18767	12.353	17908.3	0.0051316	0.08743	208.639	0.0817578	0.455325	48.3909
17	2017/03/09 23:16:34	-0.117	-0.743	742	0.353	2.691	20.662	vol0.05
18	2017/03/09 23:25:39	0.147	-3.024	684	0.443	2.624	15.985	vol0.05
19	2017/03/09 23:34:43	-0.137	-4.861	605	0.474	3.329	13.943	vol0.05
20	2017/03/09 23:43:47	0.038	-4.812	634	0.488	3.038	12.919	vol0.05	0.016	-4.23233	641	0.143272	1.04673	39.9625	0.468711	3.01093	14.3391
21	2017/03/09 23:52:51	1.569	0.482	1077	0.272	1.667	13.753	vol0.10
22	2017/03/10 00:01:55	1.653	1.286	1074	0.276	1.747	13.495	vol0.10
23	2017/03/10 00:10:58	1.673	1.18	1068	0.269	1.953	12.913	vol0.10
24	2017/03/10 00:20:02	1.654	0.979	1059	0.272	1.91	12.432	vol0.10	1.66	1.14833	1067	0.0112694	0.155931	7.54983	0.272348	1.8721	12.954
25	2017/03/10 00:29:05	2.225	3.494	1500	0.213	1.428	13.164	vol0.15
26	2017/03/10 00:38:09	2.32	3.897	1502	0.194	1.555	13.242	vol0.15
27	2017/03/10 00:47:12	2.304	3.952	1488	0.215	1.42	13.207	vol0.15
28	2017/03/10 00:56:16	2.357	4.436	1495	0.207	1.346	12.866	vol0.15	2.327	4.095	1495	0.0271846	0.296592	7	0.205516	1.44293	13.1061
29	2017/03/10 01:05:21	2.66	5.752	1989	0.159	0.996	13.934	vol0.20
30	2017/03/10 01:14:25	2.688	6.072	1995	0.168	0.973	13.348	vol0.20
31	2017/03/10 01:23:29	2.685	6.044	1980	0.175	0.891	13.845	vol0.20
32	2017/03/10 01:32:33	2.708	6.076	1977	0.162	1.081	13.668	vol0.20	2.69367	6.064	1984	0.0125033	0.0174356	9.64365	0.168417	0.984745	13.6219
33	2017/03/10 01:41:37	2.866	7.145	2390	0.138	0.912	14.237	vol0.25
34	2017/03/10 01:50:41	2.895	7.393	2425	0.148	0.844	14.666	vol0.25
35	2017/03/10 01:59:46	2.905	7.429	2413	0.151	0.82	14.821	vol0.25
36	2017/03/10 02:08:51	2.916	7.51	2414	0.133	0.81	14.559	vol0.25	2.90533	7.444	2417.33	0.010504	0.059925	6.65833	0.144215	0.82479	14.6824
37	2017/03/10 02:17:55	3.056	8.287	2918	0.13	0.707	14.949	vol0.30
38	2017/03/10 02:27:00	3.028	8.306	2919	0.124	0.753	15.626	vol0.30
39	2017/03/10 02:36:04	3.061	8.292	2923	0.114	0.882	15.53	vol0.30
40	2017/03/10 02:45:09	3.085	8.418	2928	0.128	0.711	15.529	vol0.30	3.058	8.33867	2923.33	0.0286182	0.0690604	4.50925	0.122142	0.785378	15.5617
41	2017/03/10 02:54:13	3.126	8.673	3420	0.12	0.662	16.052	vol0.35
42	2017/03/10 03:03:17	3.193	8.903	3479	0.12	0.625	16.752	vol0.35
43	2017/03/10 03:12:21	3.197	9.132	3485	0.116	0.601	16.636	vol0.35
44	2017/03/10 03:21:25	3.198	9.094	3487	0.115	0.623	16.621	vol0.35	3.196	9.043	3483.67	0.00264575	0.122723	4.16333	0.11702	0.616429	16.6698
45	2017/03/10 03:30:30	3.218	9.41	3853	0.116	0.626	17.403	vol0.40
46	2017/03/10 03:39:34	3.245	9.525	3896	0.112	0.651	17.507	vol0.40
47	2017/03/10 03:48:39	3.224	9.593	3950	0.092	0.497	17.965	vol0.40
48	2017/03/10 03:57:44	3.225	9.635	3920	0.105	0.621	17.379	vol0.40	3.23133	9.58433	3922	0.0118462	0.0555098	27.0555	0.103333	0.593423	17.6188
49	2017/03/10 04:06:49	3.274	9.875	4254	0.101	0.572	17.349	vol0.45
50	2017/03/10 04:15:54	3.261	9.741	4273	0.108	0.588	18.721	vol0.45
51	2017/03/10 04:24:59	3.3	10.165	4521	0.097	0.569	19.035	vol0.45
52	2017/03/10 04:34:04	3.296	10.042	4427	0.093	0.491	19.069	vol0.45	3.28567	9.98267	4407	0.0214554	0.218138	125.204	0.0995356	0.550934	18.9423
53	2017/03/10 04:43:09	3.331	10.374	4761	0.107	0.532	18.931	vol0.50
54	2017/03/10 04:52:14	3.278	10.099	4837	0.089	0.527	19.298	vol0.50
55	2017/03/10 05:01:18	3.316	10.227	4932	0.101	0.48	19.672	vol0.50
56	2017/03/10 05:10:23	3.309	10.138	4883	0.099	0.539	19.854	vol0.50	3.301	10.1547	4884	0.0202237	0.0656074	47.5079	0.0964762	0.515962	19.6094
57	2017/03/10 08:57:09	2.529	4.659	5647	0.107	0.497	19.419	vol0.55
58	2017/03/10 09:06:14	3.218	8.893	4940	0.101	0.489	18.011	vol0.55
59	2017/03/10 09:15:19	3.283	9.742	5342	0.099	0.545	18.87	vol0.55
60	2017/03/10 09:24:24	3.293	10.051	5223	0.092	0.476	18.978	vol0.55	3.26467	9.562	5168.33	0.0407226	0.599617	206.5	0.0974098	0.504223	18.6247
61	2017/03/10 09:33:29	3.334	10.275	5745	0.098	0.431	20.386	vol0.60
62	2017/03/10 09:42:34	3.348	10.557	5693	0.084	0.469	20.438	vol0.60
63	2017/03/10 09:51:39	3.341	10.518	5804	0.08	0.456	20.306	vol0.60
64	2017/03/10 10:00:44	3.362	10.643	5795	0.091	0.453	20.685	vol0.60	3.35033	10.5727	5764	0.0106927	0.0639557	61.6523	0.0851215	0.459386	20.4769
65	2017/03/10 10:09:49	3.394	10.802	6274	0.087	0.445	21.731	vol0.65
66	2017/03/10 10:18:55	3.357	10.751	6160	0.082	0.432	21.282	vol0.65
67	2017/03/10 10:28:00	3.358	10.79	6159	0.098	0.424	21.343	vol0.65
68	2017/03/10 10:37:05	3.356	10.856	6048	0.094	0.417	21.674	vol0.65	3.357	10.799	6122.33	0.001	0.0530754	64.3765	0.091586	0.424378	21.4337
69	2017/03/10 10:46:10	3.358	11.011	6467	0.087	0.45	22.21	vol0.70
70	2017/03/10 10:55:16	3.393	11	6465	0.078	0.457	23.125	vol0.70
71	2017/03/10 11:04:21	3.349	11.062	6448	0.079	0.476	22.67	vol0.70
72	2017/03/10 11:13:27	3.374	10.92	6377	0.096	0.417	22.895	vol0.70	3.372	10.994	6430	0.0220681	0.0711899	46.6798	0.0847368	0.450671	22.8974
73	2017/03/10 11:22:32	3.356	11.143	6723	0.085	0.416	23.613	vol0.75
74	2017/03/10 11:31:39	3.379	11.053	6672	0.09	0.441	24.219	vol0.75
75	2017/03/10 11:40:44	3.393	11.181	6763	0.085	0.447	22.956	vol0.75
76	2017/03/10 11:49:50	3.363	11.152	6915	0.075	0.394	23.953	vol0.75	3.37833	11.1287	6783.33	0.0150111	0.0671143	122.769	0.0835663	0.42799	23.7156
77	2017/03/10 11:58:55	3.379	11.241	6955	0.088	0.4	23.271	vol0.80
78	2017/03/10 12:08:01	3.388	11.169	6971	0.08	0.46	23.161	vol0.80
79	2017/03/10 12:17:07	3.394	11.326	7014	0.089	0.499	23.59	vol0.80
80	2017/03/10 12:26:13	3.398	11.377	7008	0.076	0.425	23.567	vol0.80	3.39333	11.2907	6997.67	0.00503322	0.108408	23.2881	0.0818474	0.462322	23.4402
81	2017/03/10 12:35:19	3.371	11.443	7733	0.086	0.396	26.162	vol0.85
82	2017/03/10 12:44:24	3.365	11.31	7658	0.083	0.461	24.443	vol0.85
83	2017/03/10 12:53:30	3.388	11.544	8020	0.081	0.44	26.507	vol0.85
84	2017/03/10 13:02:36	3.37	11.421	7893	0.081	0.438	25.665	vol0.85	3.37433	11.425	7857	0.0120968	0.117051	183.665	0.0816721	0.446455	25.5524
85	2017/03/10 13:11:42	3.37	11.551	8061	0.085	0.429	26.558	vol0.90
86	2017/03/10 13:20:48	3.383	11.579	8027	0.076	0.375	27.185	vol0.90
87	2017/03/10 13:29:54	3.379	11.461	8079	0.087	0.462	26.411	vol0.90
88	2017/03/10 13:39:00	3.384	11.65	8280	0.082	0.401	28.642	vol0.90	3.382	11.5633	8128.67	0.00264575	0.095469	133.613	0.0817904	0.414274	27.4283
89	2017/03/10 13:48:06	3.363	11.522	8329	0.08	0.377	26.75	vol0.95
90	2017/03/10 13:57:12	3.383	11.629	8578	0.076	0.391	27.36	vol0.95
91	2017/03/10 14:06:19	3.386	11.616	8478	0.086	0.371	26.937	vol0.95
92	2017/03/10 14:15:25	3.389	11.71	8540	0.08	0.408	26.723	vol0.95	3.386	11.6517	8532	0.003	0.0509346	50.4777	0.0807713	0.390293	27.008
93	2017/03/10 14:24:32	3.41	11.918	9254	0.075	0.371	27.566	vol1.00
94	2017/03/10 14:33:39	3.394	11.862	9002	0.076	0.41	28.38	vol1.00
95	2017/03/10 14:42:45	3.399	11.845	9339	0.076	0.39	30.623	vol1.00
96	2017/03/10 14:51:51	3.37	11.795	9293	0.073	0.437	28.693	vol1.00	3.38767	11.834	9211.33	0.0155027	0.0348281	182.741	0.0750133	0.412783	29.2488
97	2017/03/10 15:19:05	3.324	11.434	9827	0.073	0.397	28.79	vol1.05
98	2017/03/10 15:28:12	3.396	11.823	9614	0.088	0.438	31.203	vol1.05
99	2017/03/10 15:37:19	3.396	12.006	9957	0.075	0.383	29.046	vol1.05
100	2017/03/10 15:46:25	3.384	12.073	10216	0.081	0.387	28.011	vol1.05	3.392	11.9673	9929	0.0069282	0.129408	301.975	0.0815066	0.403444	29.45
101	2017/03/10 15:55:32	3.385	12.055	10485	0.068	0.361	30.176	vol1.10
102	2017/03/10 16:04:39	3.366	11.951	10145	0.077	0.401	30.594	vol1.10
103	2017/03/10 16:13:46	3.392	12.058	10356	0.072	0.393	29.428	vol1.10
104	2017/03/10 16:22:53	3.349	12.023	10347	0.074	0.431	30.157	vol1.10	3.369	12.0107	10282.7	0.0216564	0.0545558	119.308	0.0743617	0.408661	30.0635
105	2017/03/10 16:31:59	3.358	12.114	10733	0.075	0.373	31.429	vol1.15
106	2017/03/10 16:41:06	3.362	12.133	10873	0.069	0.42	31.164	vol1.15
107	2017/03/10 16:50:13	3.337	11.904	10740	0.072	0.405	34.668	vol1.15
108	2017/03/10 16:59:20	3.392	12.267	10938	0.081	0.363	33.268	vol1.15	3.36367	12.1013	10850.3	0.0275379	0.18356	100.927	0.0741755	0.396734	33.0647
109	2017/03/10 17:08:27	3.366	12.064	11250	0.073	0.408	32.989	vol1.20
110	2017/03/10 17:17:34	3.36	12.175	11465	0.072	0.381	33.589	vol1.20
111	2017/03/10 17:26:41	3.346	12.215	11282	0.082	0.391	33.866	vol1.20
112	2017/03/10 17:35:48	3.371	12.073	10948	0.072	0.396	32.339	vol1.20	3.359	12.1543	11231.7	0.01253	0.0732211	262.149	0.0754807	0.389383	33.2713
113	2017/03/10 17:44:55	3.332	12.174	11986	0.078	0.357	33.343	vol1.25
114	2017/03/10 17:54:02	3.332	12.012	11604	0.083	0.351	33.83	vol1.25
115	2017/03/10 18:03:09	3.372	12.252	11334	0.066	0.38	34.962	vol1.25
116	2017/03/10 18:12:17	3.369	12.286	11699	0.072	0.413	33.953	vol1.25	3.35767	12.1833	11545.7	0.0222785	0.14935	189.363	0.0740023	0.382174	34.2521
117	2017/03/10 18:21:24	3.36	12.348	11908	0.074	0.373	32.148	vol1.30
118	2017/03/10 18:30:31	3.376	12.378	12041	0.072	0.432	35.577	vol1.30
119	2017/03/10 18:39:39	3.343	12.22	12125	0.069	0.408	35.531	vol1.30
120	2017/03/10 18:48:46	3.353	12.381	12121	0.081	0.383	35.323	vol1.30	3.35733	12.3263	12095.7	0.0169214	0.0920996	47.3849	0.0741755	0.408157	35.4772
121	2017/03/10 18:57:53	3.325	12.224	12500	0.069	0.403	34.26	vol1.35
122	2017/03/10 19:07:00	3.371	12.472	12533	0.074	0.366	36.192	vol1.35
123	2017/03/10 19:16:08	3.346	12.424	12533	0.079	0.367	37.468	vol1.35
124	2017/03/10 19:25:16	3.336	12.502	12782	0.085	0.394	35.522	vol1.35	3.351	12.466	12616	0.0180278	0.0393446	143.76	0.0794607	0.37589	36.403
125	2017/03/10 19:34:23	3.348	12.533	12810	0.08	0.397	36.838	vol1.40
126	2017/03/10 19:43:30	3.342	12.445	13064	0.072	0.416	36.197	vol1.40
127	2017/03/10 19:52:38	3.373	12.558	13027	0.08	0.452	35.045	vol1.40
128	2017/03/10 20:01:45	3.345	12.521	13012	0.078	0.379	36.954	vol1.40	3.35333	12.508	13034.3	0.0170978	0.0576108	26.7644	0.076742	0.416734	36.0739
129	2017/03/10 20:10:53	3.373	12.766	13503	0.083	0.394	38.208	vol1.45
130	2017/03/10 20:20:01	3.365	12.552	13303	0.08	0.396	37.344	vol1.45
131	2017/03/10 20:29:09	3.328	12.544	13671	0.074	0.412	38.909	vol1.45
132	2017/03/10 20:38:16	3.344	12.602	13355	0.078	0.405	38.482	vol1.45	3.34567	12.566	13443	0.0185562	0.0314325	199.158	0.0773736	0.404386	38.2507
133	2017/03/10 20:47:25	3.367	12.709	13867	0.077	0.41	37.976	vol1.50
134	2017/03/10 20:56:33	3.36	12.673	13885	0.07	0.374	38.009	vol1.50
135	2017/03/10 21:05:40	3.359	12.678	13561	0.074	0.415	36.386	vol1.50
136	2017/03/10 21:14:48	3.373	12.758	13894	0.077	0.398	37.276	vol1.50	3.364	12.703	13780	0.00781025	0.047697	189.713	0.0737225	0.396024	37.2296
137	2017/03/10 21:28:17	3.34	12.776	14208	0.073	0.398	40.686	vol1.55
138	2017/03/10 21:37:25	3.318	12.597	14213	0.079	0.396	37.914	vol1.55
139	2017/03/10 21:46:33	3.351	12.841	14551	0.08	0.427	39.666	vol1.55
140	2017/03/10 21:55:41	3.346	12.832	14562	0.076	0.376	39.827	vol1.55	3.33833	12.7567	14442	0.0177858	0.138349	198.396	0.0783518	0.400217	39.1453
141	2017/03/10 22:04:49	3.326	12.917	15254	0.063	0.407	41.956	vol1.60
142	2017/03/10 22:13:57	3.319	12.754	14744	0.07	0.395	41.153	vol1.60
143	2017/03/10 22:23:05	3.328	12.804	15017	0.073	0.392	42.017	vol1.60
144	2017/03/10 22:32:13	3.344	12.899	15030	0.073	0.373	38.049	vol1.60	3.33033	12.819	14930.3	0.0126623	0.0736546	161.5	0.0720139	0.386789	40.4422
145	2017/03/10 22:41:21	3.314	12.9	15476	0.072	0.405	42.932	vol1.65
146	2017/03/10 22:50:30	3.313	12.818	15442	0.073	0.389	40.661	vol1.65
147	2017/03/10 22:59:38	3.329	12.881	15446	0.082	0.429	45.125	vol1.65
148	2017/03/10 23:08:46	3.322	12.825	15414	0.072	0.408	43.024	vol1.65	3.32133	12.8413	15434	0.00802081	0.0345302	17.4356	0.0758002	0.408993	42.9754
149	2017/03/10 23:17:55	3.312	12.832	15847	0.084	0.419	42.324	vol1.70
150	2017/03/10 23:27:03	3.298	12.879	15894	0.068	0.42	44.973	vol1.70
151	2017/03/10 23:36:12	3.329	13.01	15910	0.078	0.405	43.387	vol1.70
152	2017/03/10 23:45:21	3.305	12.998	15935	0.07	0.362	43.825	vol1.70	3.31067	12.9623	15913	0.0162583	0.0724178	20.664	0.0721295	0.396429	44.0667
153	2017/03/10 23:54:29	3.312	13.058	16381	0.075	0.412	45.432	vol1.75
154	2017/03/11 00:03:38	3.327	13.079	16400	0.069	0.426	44.358	vol1.75
155	2017/03/11 00:12:46	3.359	13.086	16369	0.078	0.409	44.802	vol1.75
156	2017/03/11 00:21:55	3.293	12.963	16332	0.078	0.462	43.119	vol1.75	3.32633	13.0427	16367	0.0330051	0.0690821	34.0441	0.0751199	0.432898	44.0988
157	2017/03/11 00:31:04	3.278	13.04	16787	0.083	0.448	46.758	vol1.80
158	2017/03/11 00:40:13	3.301	13.11	16757	0.084	0.428	46.115	vol1.80
159	2017/03/11 00:49:22	3.282	13.065	16750	0.071	0.413	44.765	vol1.80
160	2017/03/11 00:58:30	3.3	13.012	16748	0.074	0.377	44.303	vol1.80	3.29433	13.0623	16751.7	0.0106927	0.0490544	4.72582	0.0765354	0.406564	45.0676
161	2017/03/11 01:07:39	3.273	13.129	17268	0.077	0.414	48.221	vol1.85
162	2017/03/11 01:16:49	3.291	13.247	17303	0.084	0.38	46.058	vol1.85
163	2017/03/11 01:25:58	3.285	13.202	17288	0.077	0.438	47.989	vol1.85
164	2017/03/11 01:35:07	3.266	13.186	17324	0.087	0.441	48.756	vol1.85	3.28067	13.2117	17305	0.0130512	0.031628	18.0831	0.0827728	0.420605	47.6145
165	2017/03/11 01:44:16	3.243	13.157	17743	0.074	0.454	46.677	vol1.90
166	2017/03/11 01:53:25	3.26	13.21	17737	0.072	0.424	45.462	vol1.90
167	2017/03/11 02:02:34	3.258	13.205	17744	0.073	0.397	45.975	vol1.90
168	2017/03/11 02:11:43	3.25	13.159	17709	0.085	0.453	46.199	vol1.90	3.256	13.1913	17730	0.0052915	0.0281129	18.5203	0.0768939	0.425282	45.8797
169	2017/03/11 02:20:52	3.232	13.299	18205	0.071	0.411	49.421	vol1.95
170	2017/03/11 02:30:02	3.246	13.246	18208	0.076	0.41	49.315	vol1.95
171	2017/03/11 02:39:11	3.236	13.312	18199	0.081	0.385	48.688	vol1.95
172	2017/03/11 02:48:20	3.225	13.259	18185	0.083	0.389	45.753	vol1.95	3.23567	13.2723	18197.3	0.010504	0.0349619	11.5902	0.0800541	0.394819	47.9438
173	2017/03/11 02:57:30	3.242	13.348	18651	0.083	0.458	50.125	vol2.00
174	2017/03/11 03:06:39	3.242	13.27	18641	0.076	0.416	49.673	vol2.00
175	2017/03/11 03:15:48	3.228	13.203	18628	0.067	0.459	47.491	vol2.00
176	2017/03/11 03:24:57	3.233	13.378	18599	0.072	0.436	50.105	vol2.00	3.23433	13.2837	18622.7	0.0070946	0.0882968	21.5019	0.0717612	0.437353	49.103
177	2017/03/11 14:50:52	2.748	10.161	20032	0.071	0.522	41.364	vol2.05
178	2017/03/11 15:00:01	3.219	12.77	19111	0.071	0.421	42.606	vol2.05
179	2017/03/11 15:09:11	3.222	12.966	19271	0.072	0.434	41.846	vol2.05
180	2017/03/11 15:18:21	3.27	13.175	18994	0.093	0.435	43.822	vol2.05	3.237	12.9703	19125.3	0.0286182	0.202535	139.055	0.0793179	0.430047	42.7657
181	2017/03/11 15:27:30	3.252	13.311	19567	0.084	0.47	45.418	vol2.10
182	2017/03/11 15:36:40	3.27	13.369	19574	0.077	0.458	46.887	vol2.10
183	2017/03/11 15:45:50	3.269	13.439	19590	0.071	0.368	49.342	vol2.10
184	2017/03/11 15:55:00	3.284	13.433	19598	0.072	0.402	43.303	vol2.10	3.27433	13.4137	19587.3	0.0083865	0.0387986	12.2202	0.0733803	0.411012	46.5767
185	2017/03/11 16:04:10	3.262	13.514	20017	0.074	0.44	49.981	vol2.15
186	2017/03/11 16:13:19	3.269	13.462	20037	0.075	0.427	47.547	vol2.15
187	2017/03/11 16:22:29	3.254	13.509	20039	0.077	0.449	50.516	vol2.15
188	2017/03/11 16:31:39	3.284	13.607	20079	0.081	0.468	51.868	vol2.15	3.269	13.526	20051.7	0.015	0.0739797	23.6925	0.0777067	0.448313	50.0096
189	2017/03/11 16:40:49	3.256	13.631	20557	0.068	0.43	47.205	vol2.20
190	2017/03/11 16:49:59	3.263	13.663	20459	0.084	0.45	49.901	vol2.20
191	2017/03/11 16:59:09	3.267	13.677	20510	0.082	0.476	48.346	vol2.20
192	2017/03/11 17:08:19	3.248	13.647	20496	0.073	0.453	52.218	vol2.20	3.25933	13.6623	20488.3	0.0100167	0.0150111	26.3502	0.0798102	0.459813	50.1802
193	2017/03/11 17:17:29	3.231	13.692	20984	0.083	0.503	50.371	vol2.25
194	2017/03/11 17:26:40	3.221	13.754	20997	0.076	0.473	52.261	vol2.25
195	2017/03/11 17:35:50	3.212	13.663	20969	0.082	0.453	46.191	vol2.25
196	2017/03/11 17:45:00	3.237	13.654	20960	0.079	0.464	51.302	vol2.25	3.22333	13.6903	20975.3	0.0126623	0.0553203	19.2959	0.079038	0.463406	49.9891
197	2017/03/11 17:54:11	3.221	13.742	21468	0.073	0.475	55.344	vol2.30
198	2017/03/11 18:03:21	3.249	13.868	21478	0.066	0.45	53.024	vol2.30
199	2017/03/11 18:12:31	3.233	13.735	21404	0.081	0.433	55.191	vol2.30
200	2017/03/11 18:21:42	3.249	13.792	21422	0.078	0.473	56.109	vol2.30	3.24367	13.7983	21434.7	0.0092376	0.0667258	38.5919	0.0752795	0.452297	54.7899
201	2017/03/11 18:30:52	3.235	13.914	21931	0.083	0.435	55.066	vol2.35
202	2017/03/11 18:40:03	3.214	13.822	21842	0.082	0.481	56.073	vol2.35
203	2017/03/11 18:49:13	3.223	13.941	21879	0.069	0.442	53.698	vol2.35
204	2017/03/11 18:58:23	3.246	13.935	21816	0.078	0.48	59.267	vol2.35	3.22767	13.8993	21845.7	0.0165025	0.0670398	31.6596	0.0765267	0.468019	56.3922
205	2017/03/11 19:07:34	3.214	13.897	22277	0.074	0.447	56.031	vol2.40
206	2017/03/11 19:16:45	3.212	13.915	22283	0.078	0.467	54.243	vol2.40
207	2017/03/11 19:25:56	3.208	13.898	22298	0.083	0.47	57.771	vol2.40
208	2017/03/11 19:35:07	3.214	13.968	22273	0.067	0.527	58.109	vol2.40	3.21133	13.927	22284.7	0.00305505	0.0365103	12.5831	0.0762933	0.48878	56.7346
209	2017/03/11 19:44:18	3.217	14.026	23232	0.08	0.486	58.069	vol2.50
210	2017/03/11 19:53:29	3.197	14.149	23200	0.085	0.528	65.908	vol2.50
211	2017/03/11 20:02:40	3.218	14.195	23231	0.076	0.523	62.16	vol2.50
212	2017/03/11 20:11:51	3.183	13.979	23217	0.076	0.475	57.468	vol2.50	3.19933	14.1077	23216	0.0176163	0.113778	15.5242	0.0791138	0.509228	61.9416
213	2017/03/11 20:21:01	3.27	13.479	18641	0.074	0.423	53.671	vol2.00
214	2017/03/11 20:30:11	3.294	13.521	18661	0.074	0.457	51.938	vol2.00
215	2017/03/11 20:39:20	3.285	13.4	18700	0.08	0.422	49.015	vol2.00
216	2017/03/11 20:48:30	3.294	13.565	18487	0.07	0.398	51.983	vol2.00	3.291	13.4953	18616	0.00519615	0.085442	113.406	0.0747797	0.426355	50.9976

## Sheet: exp1_GSM1
Method	d18O	d18O_SD	d18O_corr	d18O_SD_corr	dD	dD_SD	dD_corr	dD_SD_corr	H2O	H2O_SD	H2O_corr	H2O_SD_corr	dxs	dxs_SD	dxs_corr	dxs_SD_corr	d18O_dev	dD_dev	H2O_dev	dxs_dev
'vol2.00'	-30.8453	0.00472582	-30.8455	0.00481186	-278.394	0.037899	-278.388	0.0351629	18407	241.634	18405.8	241.49	-31.631	0.006245	-31.624	0.00638036	0.0890765	0.366391	-1593	-0.346221
'vol0.10'	-30.7857	0.0181751	-30.7866	0.0181113	-264.583	1.69148	-264.555	1.68876	681.667	53.3135	675.5	52.9606	-18.2977	1.78797	-18.2622	1.78452	0.148006	14.1996	-19318.3	13.0156
'vol0.15'	-30.6707	0.0172434	-30.6719	0.0173316	-271.587	0.471884	-271.548	0.469237	1310.33	44.411	1301.76	44.98	-26.2213	0.334835	-26.172	0.331537	0.262649	7.20694	-18689.7	5.10575
'vol0.20'	-30.611	0.0180278	-30.6126	0.0180528	-273.506	0.234558	-273.456	0.231822	1777	30.5123	1766.02	30.2312	-28.6183	0.248148	-28.5552	0.245454	0.321957	5.29825	-18223	2.72259
'vol0.25'	-30.5857	0.0178979	-30.5877	0.0179753	-274.72	0.0548847	-274.659	0.05248	2235	8.18535	2221.62	8.77344	-30.035	0.0883572	-29.958	0.091326	0.346933	4.09522	-17765	1.31975
'vol0.30'	-30.572	0.0145258	-30.5743	0.0146152	-275.475	0.0852369	-275.403	0.0825001	2691.33	57.0993	2675.55	57.2344	-30.8993	0.0310054	-30.8085	0.0344659	0.360242	3.35119	-17308.7	0.469255
'vol0.35'	-30.569	0.0398873	-30.5717	0.039892	-275.951	0.265462	-275.868	0.264471	3213.67	15.3731	3195.47	15.3258	-31.3993	0.108103	-31.2947	0.105536	0.362884	2.88616	-16786.3	-0.0169094
'vol0.40'	-30.557	0.0117898	-30.5601	0.0118508	-276.452	0.022745	-276.358	0.0209037	3824.67	23.4592	3804.07	22.8821	-31.9957	0.0980068	-31.8772	0.0997492	0.374526	2.39681	-16175.3	-0.5994
'vol0.45'	-30.575	0.00458258	-30.5784	0.00449467	-276.729	0.0280951	-276.624	0.0253607	4122.33	89.5786	4099.33	89.1225	-32.1293	0.0641665	-31.997	0.0607147	0.356167	2.13012	-15877.7	-0.719214
'vol0.50'	-30.5563	0.0145717	-30.5637	0.0145597	-275.929	0.536181	-275.702	0.533599	4948.33	51.8106	4898.51	52.3857	-31.4787	0.524681	-31.1921	0.521248	0.370844	3.05244	-15051.7	0.0856897
'vol0.55'	-30.5627	0.00929157	-30.5704	0.00937841	-276.986	0.1068	-276.747	0.104298	5352	130.184	5299.77	130.042	-32.4843	0.0670994	-32.1839	0.0658609	0.364152	2.00709	-14648	-0.906124
'vol0.60'	-30.573	0.0274955	-30.5811	0.0274075	-277.315	0.107482	-277.066	0.110005	5730.67	97.3259	5676.02	97.8955	-32.7313	0.144777	-32.4171	0.14198	0.35346	1.68842	-14269.3	-1.13927
'vol0.65'	-30.584	0.0199249	-30.5925	0.0198462	-277.546	0.0729178	-277.286	0.072781	6245	122.503	6187.95	121.923	-32.874	0.145041	-32.5459	0.141578	0.342102	1.46874	-13755	-1.26808
'vol0.70'	-30.604	0.0173494	-30.6128	0.017378	-277.689	0.110322	-277.418	0.109492	6626.33	145.383	6566.87	144.819	-32.857	0.0284781	-32.515	0.0298162	0.321743	1.33673	-13373.7	-1.23722
'vol0.75'	-30.63	0.013	-30.6392	0.0130793	-277.818	0.143063	-277.536	0.140464	6858.67	55.1936	6796.79	55.2242	-32.778	0.103937	-32.4222	0.102536	0.295385	1.21872	-13141.3	-1.14436
'vol0.80'	-30.6257	0.0236925	-30.6352	0.0236964	-277.938	0.159657	-277.644	0.159724	7500	247.192	7435.72	247.31	-32.9323	0.0315331	-32.5626	0.0328521	0.299359	1.11006	-12500	-1.28482
'vol0.85'	-30.6383	0.020502	-30.6483	0.0205001	-278.029	0.136405	-277.725	0.135572	7999	117.58	7932.3	117.645	-32.9227	0.0578129	-32.5391	0.0550637	0.286334	1.02939	-12001	-1.26128
'vol0.90'	-30.6493	0.0295691	-30.6596	0.0296193	-278.149	0.182083	-277.833	0.179585	8303	161.13	8233.89	160.531	-32.954	0.124952	-32.5565	0.124067	0.274975	0.921071	-11697	-1.27873
'vol0.95'	-30.674	0.0194679	-30.6846	0.0194011	-278.213	0.106604	-277.887	0.108329	8882.33	228.937	8810.81	229.437	-32.8213	0.053929	-32.41	0.0507278	0.249949	0.867414	-11117.7	-1.13218
'vol1.00'	-30.6493	0.0100167	-30.6609	0.010035	-278.073	0.0451331	-277.719	0.0467434	8839.67	217.339	8762.1	217.183	-32.8783	0.0585349	-32.4322	0.0610446	0.273717	1.0353	-11160.3	-1.15444
'vol1.05'	-30.6257	0.0424421	-30.6376	0.0425247	-278.221	0.0954481	-277.856	0.0929445	9830	158.237	9750.02	158.511	-33.2153	0.244111	-32.7553	0.247316	0.297024	0.898646	-10170	-1.47755
'vol1.10'	-30.636	0.0251595	-30.6483	0.0250845	-278.316	0.109343	-277.94	0.111203	10183.3	140.058	10100.9	140.346	-33.228	0.0994585	-32.7541	0.0961454	0.286331	0.814337	-9816.67	-1.47631
'vol1.15'	-30.672	0.0127671	-30.6846	0.0128552	-278.502	0.148113	-278.115	0.14666	10856.3	221.996	10771.5	221.993	-33.1257	0.10659	-32.6379	0.107326	0.249972	0.639695	-9143.67	-1.36008
'vol1.20'	-30.6833	0.025482	-30.6963	0.0255633	-278.545	0.12243	-278.147	0.120267	11097.3	344.227	11010.1	344.267	-33.0783	0.0883761	-32.5766	0.0918228	0.238278	0.607392	-8902.67	-1.29884
'vol1.25'	-30.686	0.0317962	-30.6993	0.0317625	-278.586	0.140905	-278.177	0.140872	11445	262.92	11355.3	262.795	-33.0983	0.13699	-32.5827	0.134503	0.235252	0.57709	-8555	-1.30493
'vol1.30'	-30.7087	0.0176163	-30.7224	0.0175269	-278.695	0.0734189	-278.275	0.0756708	11893.7	189.709	11801.6	190.308	-33.026	0.0848587	-32.4965	0.0815677	0.212225	0.479121	-8106.33	-1.21868
'vol1.35'	-30.713	0.0220681	-30.7271	0.0219784	-278.69	0.0506491	-278.259	0.0532696	12300.3	37.8197	12205.8	38.3484	-32.9863	0.128021	-32.4429	0.124544	0.207532	0.495156	-7699.67	-1.1651
'vol1.40'	-30.7173	0.00550757	-30.7318	0.00541775	-278.778	0.0502029	-278.336	0.0484919	12723.7	302.047	12626.8	302.512	-33.0397	0.0863501	-32.4823	0.0833062	0.202839	0.418191	-7276.33	-1.20452
'vol1.45'	-30.751	0.018735	-30.7658	0.0186486	-278.864	0.0480451	-278.411	0.0463734	13124	131.754	13024.7	131.654	-32.8557	0.191134	-32.2844	0.187975	0.168812	0.343897	-6876	-1.0066
'vol1.50'	-30.7187	0.0327159	-30.734	0.0327903	-278.724	0.203951	-278.254	0.201737	13189	183.524	13085.9	183.678	-32.9747	0.0583895	-32.3818	0.06151	0.200587	0.500692	-6811	-1.104
'vol1.55'	-30.693	0.0365103	-30.7087	0.0365757	-278.74	0.103737	-278.258	0.10124	13543.3	250.847	13437.8	250.707	-33.1957	0.196431	-32.5889	0.198544	0.225893	0.496071	-6456.67	-1.31107
'vol1.60'	-30.7677	0.0132791	-30.7837	0.0132012	-278.961	0.0752861	-278.469	0.0774671	14373.7	128.959	14265.7	129.337	-32.8197	0.0336056	-32.1989	0.0301956	0.150866	0.285785	-5626.33	-0.921143
'vol1.65'	-30.7827	0.00665833	-30.7991	0.00658409	-279.022	0.0413078	-278.519	0.0389948	14712.7	88.0473	14602.3	88.6527	-32.761	0.0945569	-32.1263	0.0916666	0.135506	0.235499	-5287.33	-0.848545
'vol1.70'	-30.7827	0.00945163	-30.7994	0.00951856	-279.038	0.0185023	-278.523	0.0200612	14801.3	223.934	14688.6	223.461	-32.7763	0.0742316	-32.1277	0.0773226	0.135145	0.231221	-5198.67	-0.849939
'vol1.75'	-30.794	0.005	-30.8111	0.00495556	-279.117	0.0508953	-278.592	0.0532252	15098.3	17.0098	14983.1	16.7329	-32.7653	0.0234592	-32.1028	0.0268218	0.123451	0.162616	-4901.67	-0.82499
'vol1.80'	-30.805	0.005	-30.8225	0.00504566	-279.116	0.0205508	-278.579	0.0205335	15528	233.669	15410.4	233.08	-32.6757	0.0581578	-31.9992	0.0593573	0.11209	0.175343	-4472	-0.721377
'vol1.85'	-30.818	0.00458258	-30.8359	0.00449403	-279.1	0.0670398	-278.552	0.0698032	15885.7	60.1858	15765.6	60.0171	-32.5557	0.0323471	-31.8652	0.0357019	0.0987292	0.202403	-4114.33	-0.587431
'vol1.90'	-30.845	0.0115326	-30.8632	0.0114937	-279.212	0.0106927	-278.653	0.0111696	16412.3	235.84	16289.9	236.227	-32.4517	0.0825247	-31.7473	0.0809124	0.0713681	0.101471	-3587.67	-0.469474
'vol1.95'	-30.8517	0.016773	-30.8702	0.0166923	-279.24	0.0624206	-278.67	0.065149	16886.7	177.088	16761.8	177.259	-32.4263	0.0917842	-31.708	0.0896003	0.0643404	0.0845412	-3113.33	-0.430182
'vol2.00'	-30.825	0.0485695	-30.8455	0.0486599	-279.017	0.195502	-278.388	0.192765	18543.7	170.016	18405.8	169.408	-32.417	0.195277	-31.624	0.198768	0.0890765	0.366391	-1456.33	-0.346221
'vol2.05'	-30.8963	0.0124231	-30.9172	0.012427	-279.398	0.003	-278.758	0.000229967	18987.7	36.074	18847.4	35.8085	-32.2273	0.0993093	-31.4204	0.099404	0.0173815	-0.00352204	-1012.33	-0.142574
'vol2.10'	-30.9003	0.017673	-30.9216	0.0176655	-279.364	0.0315331	-278.713	0.0342625	19501	158.786	19358.3	159.059	-32.161	0.136429	-31.3401	0.13696	0.01302	0.0418931	-499	-0.0622669
'vol2.15'	-30.9133	0.0213854	-30.9349	0.0214614	-279.434	0.0770087	-278.772	0.074239	19895.7	97.5722	19750.5	97.0719	-32.1277	0.113183	-31.2928	0.115283	-0.000341733	-0.017685	-104.333	-0.0149514
'vol2.20'	-30.9177	0.0106927	-30.9396	0.0107225	-279.426	0.0556447	-278.752	0.0536891	20191.3	407.971	20043.7	407.777	-32.0843	0.0438216	-31.2354	0.0429948	-0.00503667	0.00206687	191.333	0.04236
'vol2.25'	-30.9293	0.012741	-30.9517	0.0127336	-279.433	0.0106927	-278.748	0.013369	20649.3	204.493	20499.1	204.661	-31.998	0.107392	-31.134	0.107499	-0.0170931	0.00701408	649.333	0.143758
'vol2.30'	-30.9433	0.0051316	-30.9661	0.00507035	-279.509	0.00416333	-278.812	0.00168521	21043.7	143.932	20890.9	143.383	-31.962	0.0446766	-31.0837	0.042243	-0.0314643	-0.0576067	1043.67	0.194107
'vol2.35'	-30.957	0.0141774	-30.9801	0.0142725	-279.517	0.0822739	-278.809	0.0823478	21216	288.969	21060.7	288.601	-31.861	0.118495	-30.9676	0.122034	-0.0455206	-0.0539945	1216	0.31017
'vol2.40'	-30.9673	0.0273191	-30.9908	0.0272313	-279.535	0.0815128	-278.815	0.0841717	21641	272.419	21483.2	273.006	-31.796	0.137197	-30.8883	0.133782	-0.0562254	-0.0602735	1641	0.389529
'vol2.50'	-30.9703	0.00650641	-30.9942	0.00655311	-279.591	0.0109697	-278.86	0.00845824	22715.7	47.0142	22555.2	46.3429	-31.8287	0.0536687	-30.9059	0.05484	-0.0596156	-0.104978	2715.67	0.371947

## Sheet: exp1_MIX
Method	d18O	d18O_SD	d18O_corr	d18O_SD_corr	dD	dD_SD	dD_corr	dD_SD_corr	H2O	H2O_SD	H2O_corr	H2O_SD_corr	dxs	dxs_SD	dxs_corr	dxs_SD_corr	d18O_dev	dD_dev	H2O_dev	dxs_dev
'vol2.00'	-22.8673	0.0211266	-22.8672	0.0211774	-202.089	0.145204	-202.082	0.145238	18612	86.6949	18613.8	86.7422	-19.1507	0.100898	-19.1449	0.0980238	0.0285014	0.105703	-1388	-0.122308
'vol0.05'	-23.416	0.0791644	-23.4155	0.0791725	-194.916	0.462606	-194.895	0.464222	487.667	23.6925	493.112	22.8959	-7.58833	1.05321	-7.57112	1.05362	-0.519826	7.29287	-19512.3	11.4515
'vol0.10'	-22.9027	0.0176163	-22.9018	0.0175346	-197.858	0.3582	-197.823	0.355767	909.333	9.45163	918.392	8.59569	-14.6367	0.24842	-14.608	0.247151	-0.00615367	4.36534	-19090.7	4.41457
'vol0.15'	-22.7503	0.0240069	-22.7491	0.0240634	-199.219	0.0905226	-199.169	0.0936964	1345.67	2.08167	1358.34	2.06093	-17.216	0.189518	-17.1759	0.188832	0.146519	3.01881	-18654.3	1.84666
'vol0.20'	-22.7163	0.0153731	-22.7148	0.0153043	-200.124	0.178478	-200.061	0.176031	1854.67	12.897	1870.96	13.7746	-18.3937	0.200973	-18.3422	0.200645	0.180857	2.12728	-18145.3	0.680425
'vol0.25'	-22.6827	0.0064291	-22.6808	0.00636333	-200.531	0.0360416	-200.453	0.0342555	2236.67	0.57735	2256.57	1.43455	-19.0697	0.0205994	-19.0067	0.0234493	0.214863	1.73477	-17763.3	0.0158631
'vol0.30'	-22.6483	0.0155027	-22.6461	0.0154372	-200.989	0.0417612	-200.897	0.0389378	2756	25.2389	2779.52	24.5106	-19.8023	0.0823974	-19.728	0.0845679	0.249536	1.29092	-17244	-0.705366
'vol0.35'	-22.6393	0.0113725	-22.6368	0.0114546	-201.112	0.102621	-201.006	0.103643	3269.33	51.8588	3296.47	51.0221	-19.9973	0.0965419	-19.9115	0.0947897	0.258875	1.18207	-16730.7	-0.888928
'vol0.40'	-22.6457	0.0184481	-22.6428	0.0183653	-201.409	0.0501431	-201.288	0.047404	3878.67	51.5396	3909.43	52.3578	-20.2433	0.10451	-20.1461	0.107372	0.252881	0.899561	-16121.3	-1.12349
'vol0.45'	-22.6333	0.0057735	-22.6301	0.00570012	-201.53	0.0595343	-201.395	0.0567167	4298	57	4332.38	57.906	-20.463	0.0145258	-20.3543	0.0131685	0.265554	0.792729	-15702	-1.3317
'vol0.50'	-22.589	0.00818535	-22.584	0.00812849	-200.988	0.334455	-200.779	0.331039	4851.67	21.0317	4905.03	20.5507	-20.2757	0.281376	-20.1069	0.27854	0.311666	1.40897	-15148.3	-1.08436
'vol0.55'	-22.603	0.0108167	-22.5977	0.0108406	-201.573	0.0964642	-201.35	0.0966412	5373.67	53.9846	5430.65	54.7672	-20.7487	0.0248462	-20.5685	0.0224781	0.298006	0.838147	-14626.3	-1.5459
'vol0.60'	-22.622	0.0180831	-22.6163	0.0179986	-201.788	0.0928601	-201.551	0.090119	5847.67	19.5533	5908.28	20.0766	-20.812	0.101385	-20.6204	0.103425	0.279346	0.636993	-14152.3	-1.59777
'vol0.65'	-22.613	0.00964365	-22.607	0.00965718	-201.894	0.0450148	-201.643	0.0485579	6306	8.7178	6370.23	8.66028	-20.9903	0.0819898	-20.7872	0.0831855	0.288686	0.544834	-13694	-1.76465
'vol0.70'	-22.6237	0.0104083	-22.6173	0.0103882	-202.005	0.0275741	-201.74	0.0240407	6630.33	8.02081	6698.19	7.11738	-21.016	0.0791644	-20.8014	0.078946	0.278359	0.448017	-13369.7	-1.77885
'vol0.75'	-22.6283	0.01823	-22.6216	0.0182837	-202.007	0.0513907	-201.727	0.0481698	6989	96.3483	7060.49	97.1624	-20.9803	0.166896	-20.7543	0.164519	0.274032	0.460534	-13011	-1.73172
'vol0.80'	-22.6463	0.0104083	-22.6393	0.0103882	-202.123	0.0173494	-201.829	0.0152313	7525.67	12.7017	7600.78	12.734	-20.9523	0.0683691	-20.7148	0.0687844	0.256372	0.358728	-12474.3	-1.69225
'vol0.85'	-22.645	0.0165227	-22.6376	0.0166	-202.149	0.0495715	-201.841	0.0528836	8010.33	305.687	8089.08	305.207	-20.9887	0.0827124	-20.7397	0.0801543	0.258046	0.347253	-11989.7	-1.71711
'vol0.90'	-22.655	0.00984886	-22.6473	0.00993089	-202.245	0.0413562	-201.923	0.0403817	8393.67	116.453	8476.04	116.605	-21.0053	0.107361	-20.7449	0.104996	0.248386	0.264787	-11606.3	-1.7223
'vol0.95'	-22.6603	0.0116762	-22.6523	0.011731	-202.287	0.0699238	-201.951	0.0730897	8999.33	16.5025	9085.34	15.595	-21.0047	0.0393107	-20.7327	0.0395622	0.243393	0.236992	-11000.7	-1.71015
'vol1.00'	-22.652	0.0213776	-22.6434	0.0213578	-202.256	0.0862632	-201.896	0.0853027	9443.33	153.578	9535.33	154.367	-21.0403	0.085049	-20.7495	0.0856012	0.252289	0.291445	-10556.7	-1.72686
'vol1.05'	-22.6557	0.0160416	-22.6467	0.0160047	-202.264	0.0397366	-201.89	0.0419323	9847	139.431	9942.63	139.431	-21.0187	0.11524	-20.7163	0.117237	0.248962	0.297981	-10153	-1.69372
'vol1.10'	-22.682	0.00964365	-22.6727	0.00957756	-202.406	0.069407	-202.018	0.0709153	10392	237.072	10491.3	236.546	-20.9503	0.0892711	-20.6365	0.092104	0.22297	0.169857	-9608	-1.6139
'vol1.15'	-22.6847	0.0170098	-22.675	0.0170949	-202.475	0.0459674	-202.072	0.0459114	10941	114.529	11043.9	113.621	-20.9977	0.147426	-20.6723	0.14473	0.220644	0.115406	-9059	-1.64974
'vol1.20'	-22.7103	0.0178979	-22.7003	0.0178241	-202.46	0.0654319	-202.044	0.0641033	11231	141.255	11337.5	141.923	-20.7777	0.0986779	-20.4408	0.101534	0.195318	0.144286	-8769	-1.41825
'vol1.25'	-22.7263	0.0100167	-22.716	0.00995292	-202.531	0.0670895	-202.1	0.0652209	11648	122.098	11758.2	121.421	-20.7203	0.0237136	-20.372	0.0265682	0.179659	0.0878505	-8352	-1.34942
'vol1.30'	-22.7343	0.0107858	-22.7237	0.0107187	-202.52	0.0293655	-202.075	0.0317284	12218.3	199.58	12332.1	200.202	-20.6457	0.115093	-20.2858	0.11727	0.172	0.11275	-7781.67	-1.26325
'vol1.35'	-22.7433	0.00757188	-22.7323	0.00749312	-202.625	0.0141539	-202.165	0.011137	12618	146.243	12735.4	145.873	-20.678	0.0465081	-20.3067	0.0492083	0.163341	0.02265	-7382	-1.28408
'vol1.40'	-22.7847	0.0228546	-22.7733	0.0227781	-202.746	0.0992287	-202.272	0.0962888	13177.7	77.3585	13298.8	77.9557	-20.4683	0.0854537	-20.0855	0.0882026	0.122349	-0.0841104	-6822.33	-1.0629
'vol1.45'	-22.7763	0.0215716	-22.7646	0.0215044	-202.73	0.0451331	-202.242	0.0419656	13548.3	141.606	13673.1	140.987	-20.5193	0.128726	-20.125	0.130876	0.131023	-0.0542041	-6451.67	-1.10239
'vol1.50'	-22.7683	0.00585947	-22.756	0.00593963	-202.694	0.0755006	-202.178	0.0747317	14097	154.619	14229	155.528	-20.5477	0.108868	-20.1304	0.107256	0.139701	0.00975332	-5903	-1.10786
'vol1.55'	-22.8003	0.00702377	-22.7876	0.00710897	-202.746	0.0343948	-202.216	0.0379246	14529.3	129.863	14664.9	130.203	-20.3433	0.0240901	-19.9146	0.0214893	0.108043	-0.0276651	-5470.67	-0.892008
'vol1.60'	-22.7913	0.00416333	-22.7783	0.00422535	-202.72	0.0390512	-202.175	0.0358892	14922.3	104.558	15061.6	104.636	-20.3893	0.0715146	-19.9491	0.0691552	0.117385	0.0125962	-5077.67	-0.926481
'vol1.65'	-22.8107	0.0130128	-22.7973	0.0129737	-202.754	0.0351615	-202.195	0.0360918	15470	38.223	15612.9	39.0475	-20.269	0.0802932	-19.8172	0.0823095	0.098393	-0.00748025	-4530	-0.794624
'vol1.70'	-22.7953	0.0314696	-22.7816	0.0313962	-202.733	0.0761402	-202.16	0.0725804	15915	189.507	16061.5	190.417	-20.3707	0.193756	-19.9073	0.195851	0.114068	0.0277875	-4085	-0.884759
'vol1.75'	-22.8477	0.0161967	-22.8336	0.0161255	-202.77	0.0602107	-202.183	0.0567828	16366.3	131.975	16516.5	131.777	-19.989	0.0746458	-19.5142	0.0766069	0.0620769	0.00505309	-3633.67	-0.491561
'vol1.80'	-22.8567	0.0110151	-22.8422	0.0110851	-202.835	0.0197569	-202.233	0.0177168	16725.3	221.73	16879.2	221.24	-19.9813	0.107286	-19.495	0.105032	0.0534187	-0.0450168	-3274.67	-0.472366
'vol1.85'	-22.86	0.0072111	-22.8452	0.00712824	-202.823	0.0427707	-202.207	0.0430865	17206.3	143.654	17363.8	144.074	-19.9433	0.0647868	-19.4454	0.0673784	0.0504272	-0.0194201	-2793.67	-0.422837
'vol1.90'	-22.8953	0.0191398	-22.8802	0.0190796	-202.971	0.0790527	-202.34	0.0772168	17641.7	109.208	17802.8	108.667	-19.808	0.078	-19.2986	0.0804542	0.0154359	-0.152483	-2358.33	-0.27597
'vol1.95'	-22.8813	0.0190875	-22.8659	0.019072	-202.854	0.0355949	-202.209	0.0337169	17997	132.827	18161.8	132.614	-19.8033	0.120931	-19.2823	0.121158	0.0297782	-0.0215317	-2003	-0.259757
'vol2.00'	-22.8843	0.0134288	-22.8671	0.0133007	-202.799	0.0990471	-202.085	0.10021	18430.7	171.797	18611.8	169.142	-19.724	0.0875728	-19.1482	0.087473	0.0286101	0.103281	-1569.33	-0.125599
'vol2.05'	-22.89	0.019975	-22.8707	0.0194069	-202.827	0.0212211	-202.104	0.0179217	19063.7	344.784	19231.5	342.859	-19.7067	0.138601	-19.1382	0.137409	0.0249943	0.0843287	-936.333	-0.115625
'vol2.10'	-22.8967	0.0130128	-22.875	0.0127545	-202.835	0.0618574	-202.098	0.0605482	19457.7	92.4247	19611.9	93.633	-19.6613	0.042548	-19.0978	0.0419004	0.0206599	0.0901005	-542.333	-0.0751788
'vol2.15'	-22.916	0.00608276	-22.892	0.0065703	-202.795	0.035949	-202.044	0.0392641	19933.7	158.752	20074.4	161.966	-19.4667	0.0184481	-18.908	0.0188483	0.00365927	0.143874	-66.3333	0.1146
'vol2.20'	-22.933	0.014	-22.9067	0.013416	-202.935	0.0632376	-202.171	0.0598896	20308.7	62.6605	20435.8	65.5808	-19.471	0.0526023	-18.9172	0.0514288	-0.0110081	0.0173148	308.667	0.10538
'vol2.25'	-22.953	0.0173494	-22.9243	0.0167776	-202.921	0.0441928	-202.143	0.0420517	20804	80.2994	20917.6	78.9229	-19.297	0.123843	-18.7481	0.122782	-0.0286733	0.0451012	804	0.274488
'vol2.30'	-22.967	0.00866025	-22.936	0.00816004	-202.93	0.0324191	-202.138	0.034699	21302.3	46.1772	21402.3	48.2037	-19.194	0.0810617	-18.65	0.0798478	-0.0403381	0.0498896	1302.33	0.372595
'vol2.40'	-22.9853	0.0211266	-22.952	0.0217067	-202.952	0.0922442	-202.146	0.0955729	22178.3	96.9656	22264.8	100.238	-19.0693	0.0792107	-18.5302	0.0804299	-0.0563367	0.041676	2178.33	0.49237
'vol2.50'	-23.01	0.0147309	-22.9743	0.0145431	-202.995	0.0309892	-202.175	0.0299969	23069.7	110.387	23142.5	111.874	-18.9147	0.143082	-18.3804	0.142834	-0.0786679	0.0127998	3069.67	0.642143
'vol2.00'	-22.9053	0.00152753	-22.8673	0.00122772	-202.923	0.0375011	-202.089	0.0340593	18552.7	135.722	18612	132.928	-19.68	0.031	-19.1507	0.0321644	0.0283304	0.0985674	-1447.33	-0.128076

## Sheet: exp1_VATS
Method	d18O	d18O_SD	d18O_corr	d18O_SD_corr	dD	dD_SD	dD_corr	dD_SD_corr	H2O	H2O_SD	H2O_corr	H2O_SD_corr	dxs	dxs_SD	dxs_corr	dxs_SD_corr	d18O_dev	dD_dev	H2O_dev	dxs_dev
'vol2.00'	-15.9513	0.0064291	-15.9517	0.00625713	-131.564	0.0395095	-131.568	0.0386853	18437.3	158.254	18433.5	159.834	-3.95333	0.0332014	-3.95394	0.0334656	-0.00571693	0.00228362	-1562.67	0.0480175
'vol0.10'	-16.5277	0.0427356	-16.5295	0.0428962	-134.346	0.135242	-134.364	0.134215	936	1	916.962	0.87785	-2.125	0.383402	-2.12803	0.383106	-0.583535	-2.79435	-19064	1.87392
'vol0.15'	-16.1427	0.0395769	-16.1453	0.0394086	-133.348	0.128204	-133.373	0.126475	1352.67	12.7017	1326.12	14.3572	-4.207	0.19314	-4.21123	0.193397	-0.199265	-1.8034	-18647.3	-0.209274
'vol0.20'	-15.9797	0.0132035	-15.983	0.0131423	-132.879	0.132911	-132.911	0.131216	1878.33	2.08167	1844.28	3.6737	-5.042	0.16345	-5.04742	0.163282	-0.0369963	-1.34144	-18121.7	-1.04547
'vol0.25'	-15.9037	0.0200333	-15.9077	0.0199334	-132.665	0.0880928	-132.704	0.0867408	2283.33	3.21455	2241.76	3.96785	-5.43533	0.190998	-5.44195	0.19103	0.0382721	-1.13382	-17716.7	-1.44
'vol0.30'	-15.8583	0.0136137	-15.8631	0.0134799	-132.461	0.0700095	-132.507	0.0691704	2804	31.749	2754.92	31.448	-5.59467	0.0477214	-5.60249	0.0480101	0.0828741	-0.937537	-17196	-1.60053
'vol0.35'	-15.8037	0.0118462	-15.8092	0.0120087	-132.232	0.114582	-132.285	0.112882	3305	39.8873	3248.4	39.8374	-5.80267	0.194973	-5.81168	0.194674	0.136809	-0.715256	-16695	-1.80973
'vol0.40'	-15.764	0.00655744	-15.7702	0.00662951	-132.09	0.03747	-132.15	0.0362197	3814.33	58.4836	3750.21	57.2783	-5.978	0.0521153	-5.98821	0.0518451	0.175744	-0.580309	-16185.7	-1.98626
'vol0.45'	-15.7487	0.00503322	-15.7556	0.00510885	-132.027	0.0313741	-132.094	0.0297212	4287.33	85.2428	4215.69	83.4569	-6.03733	0.0525389	-6.04875	0.0522795	0.190345	-0.524033	-15712.7	-2.04679
'vol0.50'	-15.7057	0.0110151	-15.7135	0.0109331	-131.73	0.130852	-131.806	0.130207	4833.67	47.9826	4752.76	46.163	-6.08433	0.0438444	-6.09722	0.0437871	0.232443	-0.235719	-15166.3	-2.09527
'vol0.55'	-15.719	0.00964365	-15.7276	0.00950186	-131.786	0.0818719	-131.869	0.0829074	5378.67	13.3167	5290.24	11.6504	-6.034	0.109028	-6.04809	0.109323	0.218378	-0.299108	-14621.3	-2.04613
'vol0.60'	-15.7097	0.00450925	-15.719	0.00459349	-131.724	0.00757188	-131.814	0.00754458	5872	1	5776.05	1.63179	-6.04633	0.0300888	-6.06162	0.0299203	0.226978	-0.243835	-14128	-2.05966
'vol0.65'	-15.719	0.0108167	-15.7291	0.0109947	-131.722	0.0305123	-131.819	0.0317817	6305.67	73.3848	6202.19	74.9825	-5.97	0.0755447	-5.98648	0.0752967	0.216912	-0.249228	-13694.3	-1.98453
'vol0.70'	-15.725	0.00916515	-15.7358	0.00922678	-131.717	0.0141892	-131.821	0.0153704	6675	75.6241	6563.99	75.4855	-5.91733	0.0816415	-5.93502	0.0815869	0.21018	-0.251623	-13325	-1.93306
'vol0.75'	-15.7303	0.0162891	-15.7419	0.0163126	-131.584	0.0461303	-131.695	0.0457798	7132.33	77.7324	7013.8	76.0659	-5.74133	0.0882119	-5.76022	0.0881239	0.204113	-0.125355	-12867.7	-1.75826
'vol0.80'	-15.729	0.0165227	-15.7413	0.0165404	-131.562	0.123705	-131.68	0.12331	7551.67	23.6925	7425.6	23.6878	-5.73	0.0420357	-5.75008	0.0417468	0.204713	-0.110421	-12448.3	-1.74813
'vol0.85'	-15.7293	0.0106927	-15.7423	0.0106858	-131.53	0.0761205	-131.656	0.0745339	7974.33	18.1751	7840.73	19.9965	-5.69567	0.083008	-5.71695	0.0827749	0.203646	-0.0858239	-12025.7	-1.71499
'vol0.90'	-15.7353	0.00896289	-15.7491	0.00895453	-131.563	0.0314696	-131.696	0.0330243	8239.33	60.8714	8098.19	62.6683	-5.68067	0.0924247	-5.70315	0.0925274	0.196912	-0.125898	-11760.7	-1.7012
'vol0.95'	-15.7137	0.0184481	-15.7281	0.0185036	-131.509	0.0814125	-131.648	0.0829585	8654	132.729	8505.32	133.774	-5.79967	0.104582	-5.82335	0.10466	0.217845	-0.0786346	-11346	-1.8214
'vol1.00'	-15.7463	0.00814453	-15.7681	0.00799873	-131.485	0.025	-131.695	0.0259301	8858.67	210.738	8634.75	212.089	-5.51433	0.0668606	-5.55	0.0671505	0.177855	-0.125208	-11141.3	-1.54805
'vol1.05'	-15.7287	0.0122202	-15.7512	0.0120399	-131.443	0.0625247	-131.66	0.0642798	8974.33	186.039	8742.87	187.839	-5.614	0.158341	-5.65087	0.158641	0.194787	-0.0906162	-11025.7	-1.64892
'vol1.10'	-15.7323	0.00750555	-15.7556	0.0074217	-131.471	0.031241	-131.695	0.0297844	9395.67	198.812	9156.66	198.907	-5.61233	0.0358515	-5.65041	0.0358696	0.190386	-0.125365	-10604.3	-1.64845
'vol1.15'	-15.7797	0.020232	-15.8037	0.0202418	-131.488	0.077681	-131.719	0.0780074	10042.3	104.462	9795.77	103.379	-5.25033	0.0853366	-5.28961	0.0853567	0.142317	-0.149117	-9957.67	-1.28765
'vol1.20'	-15.7837	0.0113725	-15.8084	0.0115026	-131.493	0.0270062	-131.731	0.0279029	11166.7	79.3242	10912.6	79.4895	-5.22333	0.0654319	-5.26381	0.0651975	0.137582	-0.161201	-8833.33	-1.26186
'vol1.25'	-15.7843	0.0142945	-15.8098	0.0141145	-131.483	0.0733689	-131.728	0.0722709	11798.7	208.541	11537	208.34	-5.20833	0.074272	-5.25002	0.0745394	0.13618	-0.158621	-8201.33	-1.24806
'vol1.30'	-15.789	0.0308058	-15.8152	0.0307376	-131.45	0.225887	-131.703	0.225285	12235	293.511	11965.8	293.137	-5.138	0.0219317	-5.18089	0.0221319	0.130778	-0.132707	-7765	-1.17893
'vol1.35'	-15.8017	0.00650641	-15.8286	0.00669004	-131.423	0.0215019	-131.683	0.0210353	12761.7	144.507	12484.9	143.557	-5.01	0.0612617	-5.05409	0.0609746	0.117376	-0.113128	-7238.33	-1.05213
'vol1.40'	-15.8073	0.0213854	-15.835	0.0214463	-131.416	0.152179	-131.682	0.152567	13275	187.886	12990.7	188.513	-4.957	0.0268514	-5.00229	0.0265884	0.110973	-0.11255	-6725	-1.00034
'vol1.45'	-15.8353	0.0270986	-15.8637	0.0269938	-131.392	0.23596	-131.666	0.235176	13779.3	78.9071	13487.4	77.6016	-4.70933	0.0385011	-4.75583	0.0386505	0.0822374	-0.0959751	-6220.67	-0.753875
'vol1.50'	-15.8277	0.00305505	-15.857	0.00317872	-131.358	0.0375899	-131.641	0.0393602	14305	35.5106	14003.4	33.8991	-4.73667	0.0301054	-4.7847	0.0303212	0.0889639	-0.0710345	-5695	-0.782747
'vol1.55'	-15.8383	0.0153731	-15.8684	0.0152057	-131.359	0.114595	-131.649	0.113129	14709.3	173.235	14400.2	173.132	-4.65233	0.0215716	-4.70157	0.0218099	0.0775607	-0.0791323	-5290.67	-0.699619
'vol1.60'	-15.8563	0.0168028	-15.8872	0.016924	-131.356	0.0250067	-131.653	0.0266482	15162.7	56.7568	14846	57.9758	-4.505	0.112481	-4.55545	0.112307	0.058824	-0.0828979	-4837.33	-0.553491
'vol1.65'	-15.8533	0.0126623	-15.8849	0.0127	-131.302	0.0439659	-131.606	0.0435351	15670	66.0227	15345.7	66.9467	-4.47533	0.0650103	-4.52699	0.0648647	0.061087	-0.0363334	-4330	-0.525031
'vol1.70'	-15.8567	0.0109697	-15.889	0.0110131	-131.296	0.0815128	-131.608	0.080612	16196.3	49.0544	15864.5	50.9457	-4.443	0.0639296	-4.49586	0.0636372	0.0570167	-0.0377679	-3803.67	-0.493903
'vol1.75'	-15.8613	0.00416333	-15.8944	0.00434085	-131.22	0.0397157	-131.539	0.0413772	16600	206.572	16260.6	207.02	-4.32967	0.0241937	-4.38373	0.024258	0.0516126	0.0311257	-3400	-0.381777
'vol1.80'	-15.8757	0.0172434	-15.9094	0.0170617	-131.272	0.0402616	-131.597	0.0397238	17025.3	61.5169	16678.4	63.4098	-4.26667	0.123913	-4.32194	0.124212	0.0365419	-0.0276464	-2974.67	-0.319983
'vol1.85'	-15.896	0.00781025	-15.9305	0.00765746	-131.253	0.0921466	-131.586	0.0906963	17558.3	178.262	17203.8	178.071	-4.085	0.0297153	-4.14148	0.0294773	0.0154709	-0.015755	-2441.67	-0.139524
'vol1.90'	-15.904	0.02498	-15.9393	0.0249364	-131.239	0.0877857	-131.578	0.0861375	18093.7	94.7066	17731.5	92.8258	-4.00667	0.229073	-4.06435	0.229029	0.00673285	-0.00853358	-1906.33	-0.062398
'vol1.95'	-15.9157	0.00416333	-15.9517	0.00434104	-131.243	0.0241937	-131.59	0.0258911	18400.7	287.837	18030.9	286.039	-3.918	0.00916515	-3.97689	0.00886863	-0.00567217	-0.0203154	-1599.33	0.0250604
'vol2.00'	-15.9147	0.0215484	-15.9516	0.0215214	-131.211	0.0387341	-131.567	0.0379676	18814	271.07	18434.4	270.157	-3.89333	0.207085	-3.95415	0.206443	-0.00559715	0.00303193	-1186	0.0478076
'vol2.05'	-15.9403	0.0112398	-15.9778	0.01143	-131.206	0.0271846	-131.572	0.0293746	19502	96.6902	19112.7	93.5421	-3.68333	0.0793998	-3.74948	0.0780592	-0.0317921	-0.00185907	-498	0.252476
'vol2.10'	-15.9213	0.0133167	-15.9596	0.0133326	-131.14	0.0490748	-131.518	0.0491705	19911.7	89.9407	19509.8	87.0724	-3.769	0.0577148	-3.84129	0.0575227	-0.0135694	0.0521114	-88.3333	0.160665
'vol2.15'	-15.9447	0.00750555	-15.9837	0.00750807	-131.168	0.0576888	-131.558	0.0569093	20448	94.0266	20033.5	91.8913	-3.61067	0.0166533	-3.68911	0.0151839	-0.0376806	0.0114058	448	0.312849
'vol2.20'	-15.968	0.002	-16.0078	0.00210389	-131.148	0.0273008	-131.551	0.0254915	20734.7	238.521	20307.5	236.923	-3.40433	0.0431895	-3.48892	0.042319	-0.0617916	0.018704	734.667	0.513035
'vol2.25'	-15.97	0.0101489	-16.0106	0.0102175	-131.07	0.0557494	-131.485	0.0529344	21386.3	63.705	20946.5	63.5336	-3.31	0.0955196	-3.40073	0.0942528	-0.0645693	0.0846688	1386.33	0.601221
'vol2.30'	-15.9733	0.0192959	-16.0147	0.0191554	-131.022	0.153461	-131.449	0.151118	21795	132.503	21342.6	130.969	-3.235	0.008544	-3.33188	0.00774474	-0.0686807	0.120626	1795	0.67007
'vol2.40'	-15.9857	0.0100167	-16.0278	0.00993073	-131.017	0.0593661	-131.457	0.0599404	22443.3	429.699	21978.3	432.524	-3.13133	0.137914	-3.23437	0.13843	-0.0817922	0.11325	2443.33	0.767586
'vol2.50'	-16.005	0.0043589	-16.0479	0.00420423	-131.025	0.0104083	-131.478	0.00845481	23388	364.395	22910.3	365.05	-2.98533	0.0347035	-3.09452	0.0356339	-0.101904	0.0921981	3388	0.90743
'vol2.00'	-15.9077	0.0135031	-15.9513	0.0136048	-131.099	0.0542433	-131.564	0.0548688	18927.7	86.1704	18437.3	86.4108	-3.838	0.0606712	-3.95333	0.0595025	-0.00534798	0.00583901	-1072.33	0.0486212

## Sheet: exp1_DI
Method	d18O	d18O_SD	d18O_corr	d18O_SD_corr	dD	dD_SD	dD_corr	dD_SD_corr	H2O	H2O_SD	H2O_corr	H2O_SD_corr	dxs	dxs_SD	dxs_corr	dxs_SD_corr	d18O_dev	dD_dev	H2O_dev	dxs_dev
'vol2.00'	-8.17	0.011	-8.17036	0.0108214	-47.176	0.100861	-47.1813	0.101135	18371.7	257.886	18365	260.983	18.184	0.139646	18.1815	0.140507	0.0306969	-0.118262	-1628.33	-0.363838
'vol0.05'	-10.1437	0.0312143	-10.1447	0.0310416	-56.6317	0.483235	-56.6476	0.485564	475.667	23.0072	455.649	26.3243	24.5177	0.726733	24.5103	0.727861	-1.94368	-9.58451	-19524.3	5.96492
'vol0.10'	-8.896	0.02	-8.89777	0.0199122	-53.0733	0.0173877	-53.0998	0.0149032	932	13.0767	898.697	13.1213	18.0947	0.157424	18.0824	0.157921	-0.69672	-6.03674	-19068	-0.462973
'vol0.15'	-8.53133	0.0198578	-8.53382	0.0197423	-51.5217	0.141426	-51.5587	0.14395	1338	12.2882	1291.41	9.94447	16.729	0.251388	16.7118	0.252553	-0.332761	-4.49563	-18662	-1.83353
'vol0.20'	-8.32767	0.0240901	-8.33086	0.023947	-50.6663	0.22743	-50.7139	0.229279	1803.33	39.0171	1743.46	40.6985	15.955	0.418606	15.9329	0.419527	-0.129803	-3.65085	-18196.7	-2.61243
'vol0.25'	-8.22167	0.0201329	-8.22556	0.0200632	-50.1003	0.0950807	-50.1585	0.0949909	2186.33	42.0634	2113.17	40.6698	15.673	0.0795676	15.646	0.0804872	-0.0245108	-3.09541	-17813.7	-2.89933
'vol0.30'	-8.11567	0.021362	-8.12027	0.0213918	-49.6757	0.0603517	-49.7444	0.0604739	2743.33	31.5013	2656.88	31.5203	15.2497	0.230448	15.2178	0.23031	0.080781	-2.68131	-17256.7	-3.32756
'vol0.35'	-8.07167	0.0136504	-8.07698	0.0135081	-49.3137	0.0691544	-49.3929	0.0665188	3251	42.332	3151.25	39.2062	15.2597	0.0629788	15.2229	0.0633591	0.124073	-2.32987	-16749	-3.32246
'vol0.40'	-8.06133	0.00896289	-8.06736	0.00895466	-49.1587	0.0839782	-49.2485	0.0813546	3651.67	43.6616	3538.63	43.9751	15.332	0.113168	15.2903	0.112312	0.133698	-2.18544	-16348.3	-3.25502
'vol0.45'	-8.00133	0.0011547	-8.00807	0.00131107	-48.8193	0.0550757	-48.9197	0.054899	4229.67	44.0946	4103.32	40.819	15.1913	0.0608714	15.1448	0.0606217	0.192989	-1.85668	-15770.3	-3.40059
'vol0.50'	-7.98333	0.00971253	-7.99116	0.00959473	-48.5753	0.118035	-48.692	0.116179	4858	38.7427	4711.2	36.2723	15.2913	0.0406489	15.2372	0.039706	0.209899	-1.62894	-15142	-3.30813
'vol0.55'	-7.97367	0.0046188	-7.9822	0.00446611	-48.4687	0.0428525	-48.5959	0.0413029	5232.67	54.4181	5072.55	51.4419	15.3207	0.0528804	15.2617	0.0530341	0.218856	-1.53285	-14767.3	-3.2837
'vol0.60'	-7.97167	0.0146401	-7.98091	0.0147499	-48.3597	0.0153731	-48.4975	0.0178169	5630.67	92.0887	5457.24	92.167	15.4137	0.103751	15.3498	0.10307	0.220147	-1.43443	-14369.3	-3.1956
'vol0.65'	-7.95433	0.00665833	-7.96428	0.00653972	-48.2347	0.0228108	-48.3831	0.0245782	5967	20.9523	5780.26	24.2203	15.4	0.0549454	15.3312	0.0560753	0.236771	-1.32001	-14033	-3.21418
'vol0.70'	-7.957	0.003	-7.96766	0.00291549	-48.1523	0.0424774	-48.3113	0.0435133	6425.67	22.3681	6225.61	25.6478	15.5037	0.0332916	15.4299	0.0343116	0.233395	-1.24826	-13574.3	-3.11542
'vol0.75'	-7.95533	0.0125033	-7.9667	0.0126667	-48.0743	0.0582266	-48.2439	0.0602953	6736	2.64575	6522.63	5.60449	15.5683	0.0470567	15.4897	0.0458311	0.234352	-1.18084	-13264	-3.05566
'vol0.80'	-7.94733	0.00493288	-7.95941	0.00477147	-48.0513	0.0614356	-48.2315	0.0596105	6785	88.476	6558.3	91.283	15.5273	0.0604511	15.4438	0.0603206	0.241642	-1.16843	-13215	-3.10157
'vol0.85'	-7.957	0.028931	-7.96979	0.0287653	-48.0063	0.100286	-48.1971	0.098214	7082	166.135	6841.98	167.111	15.6497	0.138655	15.5612	0.139869	0.231265	-1.13402	-12918	-2.98414
'vol0.90'	-7.941	0.004	-7.9545	0.0038224	-47.8197	0.0210792	-48.021	0.0185129	7535	126.677	7281.64	124.53	15.7083	0.0125033	15.615	0.0136413	0.246555	-0.957953	-12465	-2.93039
'vol0.95'	-7.93633	0.0138684	-7.95054	0.0136955	-47.855	0.0718401	-48.067	0.0692783	7727	136.591	7460.3	138.703	15.6357	0.0581578	15.5374	0.0589788	0.250511	-1.00389	-12273	-3.00797
'vol1.00'	-7.961	0.00953939	-7.97605	0.00964297	-47.6353	0.120268	-47.8598	0.12135	9488	96.5764	9205.58	97.6642	16.0527	0.0480867	15.9486	0.0482046	0.225006	-0.796718	-10512	-2.59677
'vol1.05'	-7.96967	0.00416333	-7.98543	0.00399267	-47.6367	0.0532009	-47.8717	0.0510026	9581	71.4633	9285.23	74.5352	16.1207	0.0403774	16.0117	0.0400142	0.215628	-0.808659	-10419	-2.53369
'vol1.10'	-7.98067	0.0080829	-7.99714	0.00815068	-47.6263	0.0287112	-47.872	0.0313072	9645.33	131.948	9336.2	135.168	16.219	0.0538424	16.1051	0.0539478	0.203916	-0.808949	-10354.7	-2.44028
'vol1.15'	-7.98367	0.0051316	-8.00085	0.00495838	-47.602	0.0536749	-47.8583	0.0522115	9990.67	50.6491	9668.17	48.6098	16.2673	0.0361985	16.1485	0.0365401	0.200204	-0.795232	-10009.3	-2.39687
'vol1.20'	-8.00733	0.0195021	-8.02523	0.0196802	-47.6163	0.0854478	-47.8832	0.0854891	10299.3	143.005	9963.48	139.746	16.4423	0.17899	16.3186	0.177917	0.175826	-0.820184	-9700.67	-2.22679
'vol1.25'	-8.01767	0.0179258	-8.03627	0.018075	-47.4927	0.0447363	-47.7702	0.0430597	11102	138.622	10752.8	135.79	16.6487	0.155491	16.52	0.154311	0.164781	-0.707136	-8898	-2.02538
'vol1.30'	-8.014	0.0160935	-8.03332	0.015989	-47.3577	0.106758	-47.6458	0.105742	11850	165.227	11487.4	163.737	16.7543	0.0344867	16.6207	0.0357025	0.167735	-0.582761	-8150	-1.92464
'vol1.35'	-8.03	0.00556776	-8.05003	0.00574392	-47.34	0.006245	-47.6388	0.00883048	12531	34.5977	12155	37.8024	16.9	0.0383536	16.7615	0.0371326	0.151023	-0.575719	-7469	-1.7839
'vol1.40'	-8.03	0.00916515	-8.05074	0.00922498	-47.2583	0.0428525	-47.5677	0.0402195	13096	47.0319	12706.7	43.9969	16.9817	0.0921539	16.8382	0.0912691	0.15031	-0.504679	-6904	-1.70716
'vol1.45'	-8.051	0.00360555	-8.07246	0.00356014	-47.236	0.0103923	-47.556	0.0107284	13517.3	37.5544	13114.6	40.8952	17.172	0.0389358	17.0236	0.0392083	0.128597	-0.492977	-6482.67	-1.52176
'vol1.50'	-8.043	0.0043589	-8.06517	0.00419597	-47.1923	0.0408085	-47.523	0.0426132	13985	125.192	13568.9	127.055	17.1517	0.0738738	16.9983	0.0748616	0.135885	-0.459942	-6015	-1.54702
'vol1.55'	-8.06333	0.00635085	-8.08622	0.00650578	-47.1333	0.0183394	-47.4746	0.0179467	14288	82.6378	13858.5	85.841	17.3733	0.0485833	17.2151	0.0473658	0.114838	-0.411575	-5712	-1.33028
'vol1.60'	-8.07167	0.0110151	-8.09798	0.0111774	-47.2443	0.0395011	-47.6368	0.0382227	14615	136.539	14121.2	136.887	17.329	0.12265	17.147	0.121646	0.103078	-0.573701	-5385	-1.39832
'vol1.65'	-8.09067	0.015695	-8.11769	0.0158655	-47.113	0.0926661	-47.5161	0.0935051	15138	62.0725	14630.8	62.6201	17.6123	0.105377	17.4254	0.104303	0.083364	-0.453011	-4862	-1.11992
'vol1.70'	-8.09667	0.0123423	-8.1244	0.0125159	-47.0603	0.0396274	-47.474	0.0395488	15630.7	92.4626	15110.1	89.5064	17.713	0.0998649	17.5212	0.0986482	0.0766506	-0.410985	-4369.33	-1.02419
'vol1.75'	-8.096	0.0196977	-8.12445	0.0196532	-46.9287	0.0478156	-47.353	0.0458165	16155.3	117.134	15621.4	120.353	17.8393	0.121583	17.6426	0.121624	0.0766033	-0.289968	-3844.67	-0.902794
'vol1.80'	-8.11633	0.0140119	-8.1455	0.0141082	-46.9033	0.0415251	-47.3383	0.0441871	16819.3	131.535	16272	128.381	18.0273	0.0950596	17.8256	0.0948277	0.0555559	-0.275285	-3180.67	-0.719732
'vol1.85'	-8.13367	0.0133167	-8.16355	0.0132642	-46.832	0.0451331	-47.2777	0.0427586	17500.3	123.573	16939.6	121.236	18.2373	0.121829	18.0307	0.121749	0.0375083	-0.214606	-2499.67	-0.514672
'vol1.90'	-8.13167	0.00702377	-8.16226	0.00712705	-46.829	0.134581	-47.2853	0.132615	17852.3	80.6494	17278.1	78.8513	18.2243	0.139102	18.0128	0.137931	0.0387937	-0.222265	-2147.67	-0.532614
'vol1.95'	-8.13467	0.00665833	-8.16598	0.00667424	-46.7473	0.0990067	-47.2143	0.0963386	18466	50.0899	17878.4	47.9108	18.33	0.115365	18.1135	0.114261	0.0350787	-0.151262	-1534	-0.431892
'vol2.00'	-8.13833	0.0247049	-8.17017	0.0246247	-46.7037	0.0837874	-47.1785	0.0832449	18966	83.1625	18372.3	87.2722	18.403	0.118114	18.1829	0.118953	0.0308845	-0.115416	-1034	-0.362492
'vol2.05'	-8.15033	0.00776745	-8.18189	0.00774145	-46.5797	0.0261024	-47.0498	0.0263376	19394.7	83.1885	18847.6	90.8518	18.623	0.0814125	18.4053	0.0817023	0.0191616	0.0132525	-605.333	-0.14004
'vol2.10'	-8.15233	0.0102144	-8.18375	0.0101933	-46.5143	0.0497427	-46.9817	0.0494256	19902	59.5735	19415.4	48.7586	18.7043	0.0977053	18.4884	0.097825	0.0172996	0.0813909	-98	-0.0570057
'vol2.15'	-8.17533	0.0152753	-8.20665	0.0152576	-46.5663	0.0170392	-47.0315	0.017287	20140.7	146.729	19701.3	150.307	18.8363	0.138746	18.6217	0.138955	-0.00559273	0.0315808	140.667	0.0763227
'vol2.20'	-8.191	0.00888819	-8.22221	0.00891398	-46.4807	0.0237136	-46.9436	0.0240527	20532	286.487	20139.9	274.833	19.0473	0.0665307	18.834	0.0662636	-0.0211516	0.119438	532	0.288652
'vol2.25'	-8.21833	0.0193477	-8.24943	0.019347	-46.5833	0.121583	-47.0441	0.121158	21007.7	132.032	20662.9	127.522	19.1633	0.119626	18.9513	0.119375	-0.0483772	0.0189631	1007.67	0.405981
'vol2.30'	-8.23633	0.0011547	-8.26732	0.00113146	-46.5207	0.0427356	-46.9792	0.0422687	21384.3	162.648	21086.8	170.197	19.37	0.0391535	19.1593	0.0389123	-0.0662694	0.083821	1384.33	0.613977
'vol2.40'	-8.25	0.003	-8.28088	0.00297304	-46.4713	0.0693421	-46.9277	0.0689678	22446.7	136.771	22196.5	129.616	19.5287	0.0557165	19.3193	0.0555771	-0.0798282	0.135348	2446.67	0.773974
'vol2.50'	-8.259	0.0150997	-8.28977	0.0151158	-46.3787	0.0649025	-46.8329	0.0646849	23313	112.854	23110.1	120.362	19.6933	0.184619	19.4853	0.184443	-0.0887204	0.230208	3313	0.939971
'vol2.00'	-8.13933	0.0284312	-8.17	0.0284383	-46.724	0.112929	-47.176	0.11301	18527.3	89.6735	18371.7	97.2395	18.3907	0.116131	18.184	0.116007	0.0310539	-0.112937	-1472.67	-0.361368

## Sheet: exp1_EVAP
Method	d18O	d18O_SD	d18O_corr	d18O_SD_corr	dD	dD_SD	dD_corr	dD_SD_corr	H2O	H2O_SD	H2O_corr	H2O_SD_corr	dxs	dxs_SD	dxs_corr	dxs_SD_corr	d18O_dev	dD_dev	H2O_dev	dxs_dev
'vol2.00'	3.18767	0.0051316	3.18716	0.00496319	12.353	0.08743	12.343	0.083886	17908.3	208.639	17900.6	209.423	-13.1483	0.0971665	-13.1543	0.0961258	0.00616936	-0.0775545	-2091.67	-0.126909
'vol0.05'	0.016	0.143272	0.0144966	0.143367	-4.23233	1.04673	-4.26231	1.05098	641	39.9625	617.988	42.4539	-4.36033	0.689623	-4.37829	0.691604	-3.1665	-16.6828	-19359	8.64915
'vol0.10'	1.66	0.0112694	1.6575	0.0112613	1.14833	0.155931	1.09847	0.160822	1067	7.54983	1028.73	11.3452	-12.1317	0.1695	-12.1615	0.172267	-1.52349	-11.322	-18933	0.865911
'vol0.15'	2.327	0.0271846	2.3235	0.0270156	4.095	0.296592	4.02528	0.292086	1495	7	1441.48	9.49687	-14.521	0.126582	-14.5628	0.12373	-0.85749	-8.39524	-18505	-1.53532
'vol0.20'	2.69367	0.0125033	2.68917	0.0123049	6.064	0.0174356	5.97439	0.0175735	1984	9.64365	1915.22	13.2754	-15.4853	0.0889344	-15.539	0.0915565	-0.491821	-6.44613	-18016	-2.51156
'vol0.25'	2.90533	0.010504	2.89984	0.0102543	7.444	0.059925	7.33449	0.0550738	2417.33	6.65833	2333.28	10.0495	-15.7987	0.0276466	-15.8642	0.0304192	-0.281152	-5.08602	-17582.7	-2.83681
'vol0.30'	3.058	0.0286182	3.05151	0.0283697	8.33867	0.0690604	8.20925	0.0650893	2923.33	4.50925	2824	0.738875	-16.1253	0.182563	-16.2028	0.185373	-0.129483	-4.21126	-17076.7	-3.1754
'vol0.35'	3.196	0.00264575	3.18851	0.0024116	9.043	0.122723	8.8937	0.118896	3483.67	4.16333	3369.07	1.16935	-16.525	0.103058	-16.6144	0.100898	0.00751954	-3.52682	-16516.3	-3.58697
'vol0.40'	3.23133	0.0118462	3.22285	0.0120578	9.58433	0.0555098	9.41513	0.0505798	3922	27.0555	3792.13	25.5905	-16.2663	0.147056	-16.3677	0.144323	0.0418549	-3.00539	-16078	-3.34023
'vol0.45'	3.28567	0.0214554	3.27618	0.0212522	9.98267	0.218138	9.79354	0.214733	4407	125.204	4261.84	122.89	-16.3027	0.0595343	-16.4159	0.0590813	0.0951894	-2.62697	-15593	-3.38849
'vol0.50'	3.301	0.0202237	3.29052	0.0200333	10.1547	0.0656074	9.94563	0.0643069	4884	47.5079	4723.55	45.783	-16.2533	0.112358	-16.3785	0.115134	0.109524	-2.47489	-15116	-3.35108
'vol0.55'	3.26467	0.0407226	3.2472	0.0404928	9.562	0.599617	9.21369	0.59481	5168.33	206.5	4900.99	203.9	-16.5553	0.280489	-16.7639	0.277523	0.0662075	-3.20682	-14831.7	-3.73648
'vol0.60'	3.35033	0.0106927	3.33187	0.0105309	10.5727	0.0639557	10.2044	0.0607194	5764	61.6523	5481.37	58.5296	-16.23	0.0216564	-16.4505	0.0235677	0.150875	-2.21608	-14236	-3.42308
'vol0.65'	3.357	0.001	3.33754	0.00114546	10.799	0.0530754	10.4108	0.0481548	6122.33	64.3765	5824.4	67.7279	-16.057	0.0583866	-16.2894	0.0555057	0.156543	-2.00967	-13877.7	-3.26201
'vol0.70'	3.372	0.0220681	3.35154	0.0221767	10.994	0.0711899	10.5859	0.0741076	6430	46.6798	6116.77	50.303	-15.982	0.221188	-16.2264	0.220723	0.170543	-1.83461	-13570	-3.19895
'vol0.75'	3.37833	0.0150111	3.35687	0.0151459	11.1287	0.0671143	10.7006	0.063529	6783.33	122.769	6454.79	118.984	-15.898	0.126693	-16.1543	0.124025	0.175876	-1.71989	-13216.7	-3.1269
'vol0.80'	3.39333	0.00503322	3.37087	0.00478478	11.2907	0.108408	10.8427	0.103631	6997.67	23.2881	6653.82	20.3791	-15.856	0.0690724	-16.1243	0.0663135	0.189876	-1.57783	-13002.3	-3.09684
'vol0.85'	3.37433	0.0120968	3.35087	0.0120476	11.425	0.117051	10.9571	0.11477	7857	183.665	7497.84	181.239	-15.5697	0.0364737	-15.8499	0.0335727	0.169876	-1.46345	-12143	-2.82245
'vol0.90'	3.382	0.00264575	3.35754	0.00261006	11.5633	0.095469	11.0754	0.0937283	8128.67	133.613	7754.19	129.993	-15.4927	0.0747953	-15.7848	0.0735869	0.176542	-1.34507	-11871.3	-2.7574
'vol0.95'	3.386	0.003	3.36053	0.00274959	11.6517	0.0509346	11.1438	0.0470631	8532	50.4777	8142.2	52.0436	-15.4363	0.035019	-15.7405	0.0337148	0.179541	-1.2767	-11468	-2.71303
'vol1.00'	3.38767	0.0155027	3.3612	0.0156971	11.834	0.0348281	11.3062	0.0396506	9211.33	182.741	8806.2	179.707	-15.2673	0.0930931	-15.5834	0.0911141	0.180206	-1.11435	-10788.7	-2.55599
'vol1.05'	3.392	0.0069282	3.36403	0.0071461	11.9673	0.129408	11.4096	0.12459	9929	301.975	9500.9	298.155	-15.1687	0.173096	-15.5027	0.170107	0.183039	-1.01093	-10071	-2.47524
'vol1.10'	3.369	0.0216564	3.34003	0.021756	12.0107	0.0545558	11.4329	0.0513949	10282.7	119.308	9839.23	116.078	-14.9413	0.157557	-15.2873	0.155598	0.159037	-0.98758	-9717.33	-2.25987
'vol1.15'	3.36367	0.0275379	3.3337	0.0274021	12.1013	0.18356	11.5036	0.181795	10850.3	100.927	10391.6	99.7581	-14.808	0.0547814	-15.1659	0.0576823	0.152701	-0.916898	-9149.67	-2.13851
'vol1.20'	3.359	0.01253	3.32803	0.012422	12.1543	0.0732211	11.5366	0.0767864	11231.7	262.149	10757.5	265.933	-14.7177	0.171351	-15.0876	0.173029	0.147032	-0.883892	-8768.33	-2.06015
'vol1.25'	3.35767	0.0222785	3.32569	0.0220707	12.1833	0.14935	11.5456	0.144775	11545.7	189.363	11056.2	188.434	-14.678	0.041328	-15.0599	0.0422228	0.144696	-0.874889	-8454.33	-2.03246
'vol1.30'	3.35733	0.0169214	3.32435	0.017093	12.3263	0.0920996	11.6686	0.0921566	12095.7	47.3849	11590.8	44.1902	-14.5323	0.0937781	-14.9262	0.0907911	0.14336	-0.751894	-7904.33	-1.89877
'vol1.35'	3.351	0.0180278	3.31702	0.0182716	12.466	0.0393446	11.7883	0.0377207	12616	143.76	12095.8	140.445	-14.342	0.15501	-14.7479	0.152011	0.136023	-0.632234	-7384	-1.72042
'vol1.40'	3.35333	0.0170978	3.31835	0.0170774	12.508	0.0576108	11.8103	0.0544387	13034.3	26.7644	12498.8	30.5088	-14.3187	0.0965212	-14.7365	0.0957591	0.137353	-0.610242	-6965.67	-1.70907
'vol1.45'	3.34567	0.0185562	3.30968	0.0186994	12.566	0.0314325	11.8483	0.0276221	13443	199.158	12892.1	198.691	-14.1993	0.150204	-14.6292	0.148043	0.128683	-0.572263	-6557	-1.60172
'vol1.50'	3.364	0.00781025	3.32701	0.00760267	12.703	0.047697	11.9652	0.0432974	13780	189.713	13213.7	189.659	-14.209	0.0160935	-14.6508	0.0180262	0.146012	-0.455291	-6220	-1.62338
'vol1.55'	3.33833	0.0177858	3.30022	0.0175888	12.7567	0.138349	11.9965	0.134122	14442	198.396	13858.5	195.024	-13.95	0.0157162	-14.4052	0.0149334	0.119221	-0.424036	-5558	-1.37781
'vol1.60'	3.33033	0.0126623	3.29121	0.0124145	12.819	0.0736546	12.0388	0.0687312	14930.3	161.5	14331.5	158.107	-13.8237	0.0276827	-14.2909	0.0306637	0.110217	-0.381733	-5069.67	-1.26347
'vol1.65'	3.32133	0.00802081	3.28121	0.00788267	12.8413	0.0345302	12.0411	0.0343854	15434	17.4356	14819.8	20.6493	-13.7293	0.0375278	-14.2086	0.0401528	0.100212	-0.379439	-4566	-1.18113
'vol1.70'	3.31067	0.0162583	3.26953	0.016206	12.9623	0.0724178	12.142	0.0683558	15913	20.664	15283.4	16.8509	-13.523	0.09134	-14.0142	0.090348	0.08854	-0.278487	-4087	-0.986807
'vol1.75'	3.32633	0.0330051	3.2842	0.0331353	13.0427	0.0690821	12.2023	0.0733421	16367	34.0441	15722	37.8868	-13.568	0.204272	-14.0713	0.203143	0.103201	-0.218206	-3633	-1.04382
'vol1.80'	3.29433	0.0106927	3.25119	0.0107075	13.0623	0.0490544	12.2019	0.0540614	16751.7	4.72582	16091.3	8.47127	-13.2923	0.0986222	-13.8076	0.100026	0.0701953	-0.2186	-3248.33	-0.780162
'vol1.85'	3.28067	0.0130512	3.23652	0.0132923	13.2117	0.031628	12.3312	0.03649	17305	18.0831	16629.2	16.1544	-13.0337	0.0793998	-13.561	0.0767839	0.0555222	-0.089336	-2695	-0.533514
'vol1.90'	3.256	0.0052915	3.21084	0.00552981	13.1913	0.0281129	12.2908	0.0327315	17730	18.5203	17038.8	21.5787	-12.8567	0.0146401	-13.396	0.011672	0.0298494	-0.129736	-2270	-0.368531
'vol1.95'	3.23567	0.010504	3.1895	0.0107554	13.2723	0.0349619	12.3517	0.0343844	18197.3	11.5902	17490.7	15.4183	-12.613	0.0960052	-13.1643	0.0931786	0.00850937	-0.0688119	-1802.67	-0.136887
'vol2.00'	3.23433	0.0070946	3.18725	0.00723006	13.2837	0.0882968	12.3474	0.0922864	18622.7	21.5019	17904.5	19.0852	-12.591	0.093675	-13.1506	0.0970585	0.0062554	-0.0731544	-1377.33	-0.123198
'vol2.05'	3.237	0.0286182	3.15159	0.0281755	12.9703	0.202535	11.895	0.200676	19125.3	139.055	18415.6	139.031	-12.9257	0.100182	-13.3178	0.100172	-0.029399	-0.525548	-874.667	-0.290356
'vol2.10'	3.27433	0.0083865	3.18694	0.00797573	13.4137	0.0387986	12.3309	0.0372799	19587.3	12.2202	18877.8	12.2777	-12.781	0.0635925	-13.1646	0.062822	0.00594417	-0.0896484	-412.667	-0.137202
'vol2.15'	3.269	0.015	3.17961	0.0147574	13.526	0.0739797	12.4358	0.0721585	20051.7	23.6925	19342.4	23.7444	-12.626	0.0900722	-13.0012	0.0903912	-0.00137935	0.0152511	51.6667	0.0262859
'vol2.20'	3.25933	0.0100167	3.16796	0.0103946	13.6623	0.0150111	12.5647	0.0160792	20488.3	26.3502	19779.3	26.3914	-12.4123	0.0658584	-12.779	0.0675471	-0.0130371	0.144147	488.333	0.248444
'vol2.25'	3.22333	0.0126623	3.12996	0.0123538	13.6903	0.0553203	12.5852	0.0570063	20975.3	19.2959	20266.5	19.2398	-12.0963	0.126508	-12.4545	0.124599	-0.0510291	0.164706	975.333	0.572939
'vol2.30'	3.24367	0.0092376	3.14831	0.00925077	13.7983	0.0667258	12.6858	0.0678021	21434.7	38.5919	20726.1	38.5494	-12.151	0.0425088	-12.5007	0.0406201	-0.0326881	0.265265	1434.67	0.526769
'vol2.35'	3.22767	0.0165025	3.13031	0.0160204	13.8993	0.0670398	12.7793	0.0654804	21845.7	31.6596	21137.3	31.6356	-11.922	0.0989596	-12.2632	0.0974368	-0.0506807	0.358822	1845.67	0.764267
'vol2.40'	3.21133	0.00305505	3.11199	0.00292996	13.927	0.0365103	12.7996	0.0351816	22284.7	12.5831	21576.5	12.5599	-11.7637	0.01861	-12.0963	0.0207255	-0.0690078	0.379041	2284.67	0.931103
'vol2.50'	3.19933	0.0176163	3.09799	0.0178203	14.1077	0.113778	12.9728	0.115176	23216	15.5242	22508.1	15.5564	-11.487	0.0610246	-11.8112	0.0600431	-0.0830025	0.552257	3216	1.21628
'vol2.00'	3.291	0.00519615	3.18767	0.00521964	13.4953	0.085442	12.353	0.0849817	18616	113.406	17908.3	113.361	-12.8327	0.0465224	-13.1483	0.047563	0.00667278	-0.067515	-1384	-0.120897

[truncated: 31 more sheets: IGP_flight_295_descent_raw, IGP_flight_295_descent_1min_average, exp2_GSM1, exp2_VATS, exp2_DI, exp2_EVAP, exp3_GSM1, exp3_VATS, exp3_DI, exp3_EVAP, exp6_GSM1, exp6_DI, exp7_GSM1, exp7_DI, exp9_GSM1, exp9_MIX, exp9_VATS, exp9_DI_ascend, exp9_DI_descend, exp9_EVAP …]
