# Supplementary material for: Correcting the impact of the isotope composition on the mixing ratio dependency of water vapour isotope measurements with cavity ring-down spectrometers
Source: Copernicus journal article supplement (doi:10.5194/amt-13-3167-2020), 2020-06-16
Supplement: Supplementary file [file amt-13-3167-2020-supplement-title-page.pdf › amt-13-3167-2020-supplement-title-page.pdf]

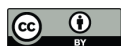

## *Supplement of*

# **Correcting the impact of the isotope composition on the mixing ratio dependency of water vapour isotope measurements with cavity ring-down spectrometers**

**Yongbiao Weng et al.**

*Correspondence to:* Yongbiao Weng ([yongbiao.weng@uib.no](mailto:yongbiao.weng@uib.no))

- [amt-13-3167-2020-supplement-title-page.pdf](#)
- [mixing\\_ratio\\_dependency\\_Weng\\_et\\_al\\_data.xlsx](#)

The copyright of individual parts of the supplement might differ from the CC BY 4.0 License.
